# Supplementary material for: Ring expansion of 3-hydroxyoxindoles to 4-quinolones via palladium-catalyzed C–C(acyl) bond cleavage
Source: Royal Society of Chemistry journal article supplement (doi:10.1039/d4cc05369a), 2024-11-20

## Supporting Information

### Ring Expansion of 3-Hydroxyoxindoles to 4-Quinolones *via* Palladium-Catalyzed C–C(acyl) Bond Cleavage

Zhi-Cong Huang,<sup>1</sup> Zhi-Ling Ruan,<sup>3</sup> Hui Xu,<sup>1</sup> Hui-Xiong Dai<sup>1,2,3\*</sup>

<sup>1</sup>State Key Laboratory of Drug Research, Shanghai Institute of Materia Medica, Chinese Academy of Sciences, Shanghai 201203, China.

<sup>2</sup>State Key Laboratory of Organometallic Chemistry, Shanghai Institute of Organic Chemistry, Chinese Academy of Sciences, Shanghai 200032, China.

<sup>3</sup>School of Chinese Materia Medica, Nanjing University of Chinese Medicine, Nanjing, Jiangsu 210023, China.

\*E-mail for Hui-Xiong Dai: hxdai@simm.ac.cn.

## Content

|                                                                              |    |
|------------------------------------------------------------------------------|----|
| 1. General Information.....                                                  | 2  |
| 2. Optimization Reaction Conditions.....                                     | 3  |
| 3. Experimental Procedure.....                                               | 5  |
| 3.1 General procedure for the synthesis of 3-Hydroxyoxindoles <b>1</b> ..... | 5  |
| 3.2 Synthesis of substrates: <b>1g-1l</b> .....                              | 5  |
| 3.3 Synthesis of substrates: <b>2w</b> .....                                 | 6  |
| 3.4 General procedure for the preparation of <b>3</b> .....                  | 6  |
| 3.5 Experimental procedure for the preparation of <b>4</b> .....             | 6  |
| 4. Analytical Data.....                                                      | 8  |
| 4.1 Characterization of Starting Material.....                               | 8  |
| 4.2 Characterization of Products.....                                        | 10 |
| 5. Supplementary References.....                                             | 19 |
| 6. X-Ray Crystallography Data of Compound <b>3h</b> .....                    | 20 |
| 7. NMR Spectra.....                                                          | 27 |

## 1. General Information

All reagents were purchased from TCI, J&K, STREM, Sigma-Aldrich, Adamas-beta, and Energy Chemical of the highest purity grade, and used directly without further purification.  $^1\text{H}$  and  $^{13}\text{C}$  NMR spectra were recorded on Bruker AVANCE III 400 and Bruker AVANCE III 500 instruments.  $^{19}\text{F}$  NMR spectra were recorded on Bruker AVANCE III 500 instrument and are reported relative to the  $\text{CFCl}_3$  as the internal standard. Chemical shifts are reported in parts per million (ppm,  $\delta$  scale) downfield from TMS at 0.00 ppm and referenced to the  $\text{CDCl}_3$  at 7.26 ppm (for  $^1\text{H}$  NMR) or 77.0 ppm (for  $^{13}\text{C}$  NMR). The following abbreviations were used to explain multiplicities: s = singlet, d = doublet, t = triplet, q = quartet, m = multiplet, dd = double of doublets, td = triple doublet, dt = double triplet, tt = triple triplet. EI-double focus magnetic-sector high resolution MS(EI-DFS-HRMS) was recorded on a DFS-Thermofischer instrument employing an ultra-high precision toroidal electrostatic analyzer (ESA) and a carefully refined magnetic analyzer at the Center for Mass Spectrometry, Shanghai Institute of Material Medica. ESI with TOF analyzer was carried out at the Center for Mass Spectrometry, Shanghai Institute of Material Medica. Solvents were purified prior to use according to conventional procedures. Column chromatography was performed on silica gel (200–300 mesh) using a mixture of petroleum ether-ethyl acetate as the eluent. Solvents were purified prior to use according to conventional procedures.



1,3,5-trioxane as internal standard.

**Table S3.** Screening of the bases

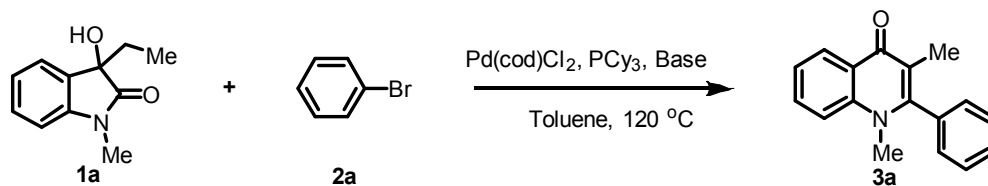

| Entry | Base                     | Yield (%) | Entry | Base                     | Yield (%) |
|-------|--------------------------|-----------|-------|--------------------------|-----------|
| 1     | $\text{Li}_2\text{CO}_3$ | 0         | 10    | $\text{KH}_2\text{PO}_4$ | 0         |
| 2     | $\text{Na}_2\text{CO}_3$ | 0         | 11    | $\text{CH}_3\text{OLi}$  | 0         |
| 3     | $\text{K}_2\text{CO}_3$  | 17        | 12    | $\text{CH}_3\text{ONa}$  | 0         |
| 4     | $\text{Cs}_2\text{CO}_3$ | 87        | 13    | <i>t</i> BuONa           | 82        |
| 5     | $\text{MgCO}_3$          | 0         | 14    | <i>t</i> BuOK            | 10        |
| 6     | $\text{NaHCO}_3$         | 0         | 15    | LiOH                     | 0         |
| 7     | $\text{KHCO}_3$          | 0         | 16    | NaOH                     | 88        |
| 8     | $\text{K}_3\text{PO}_4$  | 21        | 17    | $\text{Ca}(\text{OH})_2$ | 0         |
| 9     | $\text{K}_2\text{HPO}_4$ | 13        | 18    | NaH                      | trace     |

<sup>a</sup>**1a** (0.1 mmol), **2a** (1.5 eq.),  $\text{Pd}(\text{cod})\text{Cl}_2$  (10 mol%),  $\text{PCy}_3$  (20 mol%), Base (2.0 eq.), toluene (2.0 mL),  $120\text{ }^\circ\text{C}$ ,  $\text{N}_2$ . Yields were determined by  $^1\text{H}$  NMR of crude products using 1,3,5-trioxane as internal standard.

**Table S4.** Screening of the solvents

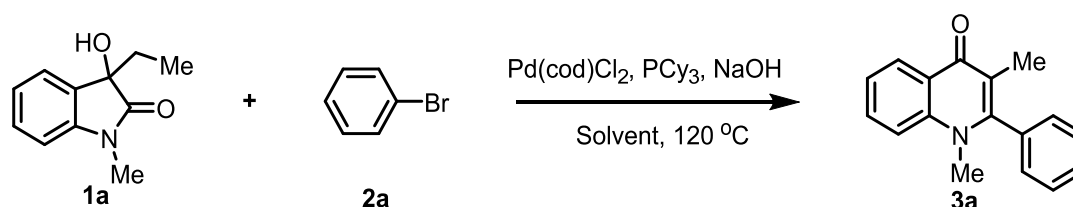

| Entry | Solvent | Yield (%) |
|-------|---------|-----------|
| 1     | Toluene | 88        |
| 2     | MeCN    | 0         |
| 3     | DCE     | 0         |
| 4     | Dioxane | 50        |
| 5     | Hexane  | 0         |
| 6     | DMF     | 0         |
| 7     | DMSO    | 20        |

<sup>a</sup>**1a** (0.1 mmol), **2a** (1.5 eq.),  $\text{Pd}(\text{cod})\text{Cl}_2$  (10 mol%),  $\text{PCy}_3$  (20 mol%), NaOH (2.0 eq.), Solvent (2.0 mL),  $120\text{ }^\circ\text{C}$ ,  $\text{N}_2$ . Yields were determined by  $^1\text{H}$  NMR of crude products using 1,3,5-trioxane as internal standard.

### 3. Experimental Procedure

#### 3.1 General procedure for the synthesis of 3-Hydroxyoxindoles **1**<sup>1</sup>

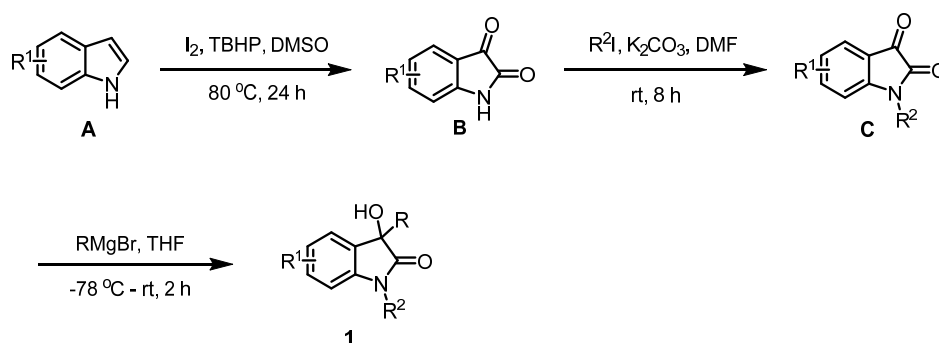

Step 1: Indoles **A** (10 mmol), iodine (3.05 g, 12 mmol, 1.2 equiv.) and dry DMSO (0.25 M) were added to an oven-dried 100 mL round bottom flask under argon gas. TBHP (5.0 – 6.0 M in Decane, 5.0 equiv.) was added dropwise over a period of 0.5 h at  $80\text{ }^\circ\text{C}$ . The mixture was then heated at  $80\text{ }^\circ\text{C}$  for 24 h. Upon the completion of reaction, after cooled to rt, the mixture was extracted with EtOAc (2 x 40 mL). The organic layer was washed with brine (40 mL), dried over anhydrous  $Na_2SO_4$ , and concentrated to give the crude product, which was further, purified by flash column chromatography on silica gel to give the desired isatins **B**.

Step 2: **B** (5 mmol, 1.0 equiv.),  $R^2I$  (6 mmol, 1.2 equiv.),  $K_2CO_3$  (1.04 g, 7.5 mmol, 1.5 equiv.) and dry DMF (0.25 M) were mixed in an oven-dried 100 mL round bottom flask under argon gas. The reaction was allowed to stir for overnight at room temperature. Upon the completion of reaction, then the reaction mixture was extracted with EtOAc, washed with sat.  $NH_4Cl$ , brine, and dried over  $Na_2SO_4$ . The residues were purified by flash column chromatography on silica gel to give **C**.

Step 3: Grignard reagent (1.5 equiv.) was added dropwise to a solution of **C** (5.0 mmol, 1.0 equiv.) in dry THF (0.5 M) for 30 min using syringe pump at  $-78\text{ }^\circ\text{C}$ . The mixture was then stirred at room temperature for 2 h. Upon the completion of reaction, then the reaction mixture was extracted with EtOAc, washed with sat.  $NH_4Cl$ , brine, and dried over  $Na_2SO_4$ . The residues were purified by flash column chromatography on silica gel to give **1**.

#### 3.2 Synthesis of substrates: **1g-11**<sup>2</sup>

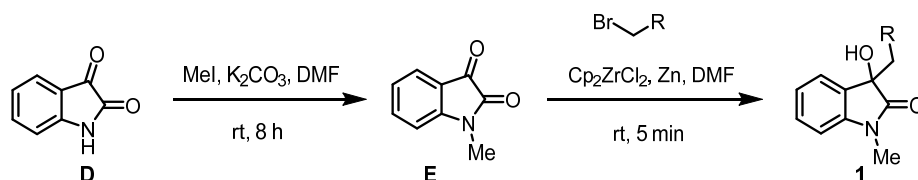

Step 1: Isatin **D** (735 mg, 5 mmol, 1.0 equiv.), MeI (852 mg, 6 mmol, 1.2 equiv.),  $K_2CO_3$  (1.04 g, 7.5 mmol, 1.5 equiv.) and dry DMF (0.25 M) were mixed in an oven-dried 100 mL round bottom flask under argon gas. The reaction was allowed to stir for overnight at room temperature. Upon the completion of reaction, then the reaction mixture was extracted with EtOAc, and washed with sat.  $NH_4Cl$ , brine, and dried over  $Na_2SO_4$ . The solution was concentrated under reduced

pressure. The compound **E** was recrystallized from EtOAc and cooled hexane.

Step 2: **E** (805 mg, 5 mmol, 1.0 equiv.), alkyl bromides (7.5 mmol, 1.5 equiv.),  $\text{Cp}_2\text{ZrCl}_2$  (146 mg, 0.5 mmol, 0.1 equiv.), zinc powder (640 mg, 10 mmol, 2 equiv.) and dry DMF (0.25 M) were added to an oven-dried 100 mL round bottom flask under argon gas. Upon the completion of reaction, then the reaction mixture was extracted with EtOAc, washed with 1M HCl, brine, and dried over  $\text{Na}_2\text{SO}_4$ . The residues were purified by flash column chromatography on silica gel to give **1**.

### 3.3 Synthesis of substrates: **2w**<sup>3</sup>

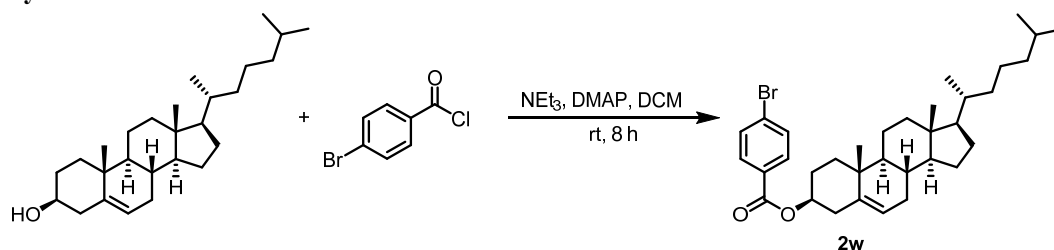

4-Bromobenzoyl chloride (1.20 g, 5.5 mmol, 1.1 equiv.) was dissolved in DCM (10 mL) and added to a mixture of cholesterol (1.93 g, 5 mmol, 1.0 equiv.), DMAP (61 mg, 0.5 mmol, 0.1 equiv.) and  $\text{Et}_3\text{N}$  (1.01 g, 10 mmol, 2.0 equiv.) in DCM (10 mL). The reaction was allowed to stirred overnight at room temperature. Then, the mixture was quenched upon addition of  $\text{NH}_4\text{Cl}$  (aq. 10%), and extracted with DCM three times. The organic phase was washed with brine, concentrated and purified by silica gel flash chromatography to give the corresponding substituted aryl bromide **2w** (2.27 g) in 90% as white solid.

### 3.4 General procedure for the preparation of **3**.

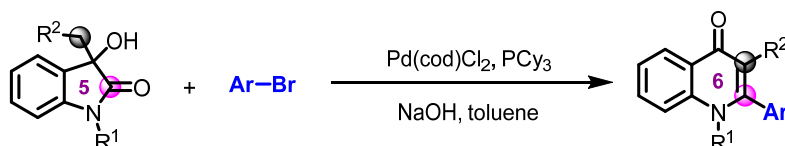

An oven dried 25 mL Schlenk tube was charged with isatin-derived aryl alcohols **1** (0.1 mmol, 1.0 equiv.), aryl bromides **2** (0.15 mmol, 1.5 equiv.),  $\text{Pd}(\text{cod})\text{Cl}_2$  (2.9 mg, 0.01 mmol, 0.1 equiv.),  $\text{PCy}_3$  (5.6 mg, 0.02 mmol, 0.2 equiv.),  $\text{NaOH}$  (8.0 mg, 0.2 mmol, 2.0 eq.), and 2.0 mL toluene. The tube was tightly capped and vigorously stirred in a pre-warmed oil bath maintained at 120 °C for a period of time under  $\text{N}_2$  atmosphere. After cooling to room temperature, the reaction mixture was filtered through celite. The filtrate was extracted with EtOAc, and the organic layer was washed with brine. The organic layer was dried over  $\text{Na}_2\text{SO}_4$  and concentrated in vacuo. The residue was purified by silica gel column chromatography (EtOAc/hexane) to afford the products.

### 3.5 Experimental procedure for the preparation of **4**.

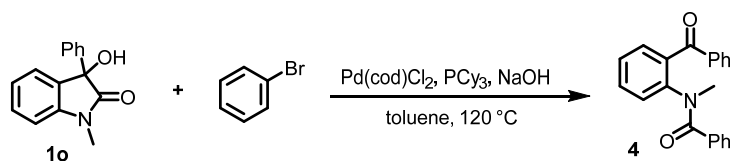

An oven dried 25 mL Schlenk tube was charged with isatin-derived aryl alcohols **1o** (23.9 mg, 0.1

mmol), PhBr (23.3 mg, 0.15 mmol, 1.5 equiv.), Pd(cod)Cl<sub>2</sub> (2.9 mg, 0.01 mmol, 0.1 equiv.), PCy<sub>3</sub> (5.6 mg, 0.02 mmol, 0.2 equiv.), NaOH (8.0 mg, 0.2 mmol, 2.0 eq.), and 2.0 mL toluene. The tube was tightly capped and vigorously stirred in a pre-warmed oil bath maintained at 120 °C for 12 h under N<sub>2</sub> atmosphere. After cooling to room temperature, the reaction mixture was filtered through celite. The filtrate was extracted with EtOAc, and the organic layer was washed with brine. The organic layer was dried over Na<sub>2</sub>SO<sub>4</sub> and concentrated in vacuo. The residue was purified by silica gel column chromatography (Hexane/EtOAc = 1:1) to afford the product **4** (27.1 mg, 86% yield).

## 4. Analytical Data

### 4.1 Characterization of Starting Material

Starting material **1a**, **1b**, **1f**, **1g-1i**, **1k**, **1l**, **1m**, **1n**, and **1o** are known products and are synthesized according to the general procedure 3.1 and 3.2.

**3-ethyl-3-hydroxy-1-methylindolin-2-one (1a)**<sup>4</sup>: Purification by flash column chromatography on silica gel (Hexane/EtOAc = 4:1) afforded **1a** as a white solid. 42% yield (0.40 g). <sup>1</sup>H NMR (500 MHz, CDCl<sub>3</sub>) δ 7.38 (dd, *J* = 7.3, 1.3 Hz, 1H), 7.33 (td, *J* = 7.8, 1.3 Hz, 1H), 7.11 (td, *J* = 7.5, 1.0 Hz, 1H), 6.84 (dd, *J* = 7.8, 0.9 Hz, 1H), 3.19 (d, *J* = 1.1 Hz, 3H), 2.08-1.94 (m, 2H), 0.75 (t, *J* = 7.5 Hz, 3H).

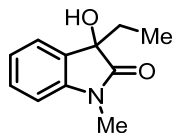

**3-ethyl-3-hydroxy-1,4-dimethylindolin-2-one (1b)**<sup>4</sup>: Purification by flash column chromatography on silica gel (Hexane/EtOAc = 4:1) afforded **1b** as a yellow solid. 38% yield (0.39 g). <sup>1</sup>H NMR (500 MHz, CDCl<sub>3</sub>) δ 7.21 (td, *J* = 7.8, 1.5 Hz, 1H), 6.87 (d, *J* = 7.8 Hz, 1H), 6.66 (d, *J* = 7.7 Hz, 1H), 3.18 (d, *J* = 1.1 Hz, 3H), 2.95-2.62 (m, 1H), 2.45 (s, 3H), 2.27-2.01 (m, 2H), 0.59 (t, *J* = 7.6, 3H).

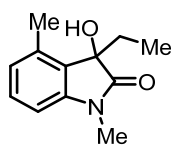

**3-ethyl-3-hydroxy-1,5-dimethylindolin-2-one (1c)**: Purification by flash column chromatography on silica gel (Hexane/EtOAc = 4:1) afforded **1c** as a yellow solid. 50% yield (0.51 g). m.p. 106-107 °C. <sup>1</sup>H NMR (500 MHz, CDCl<sub>3</sub>) δ 7.21 (d, *J* = 1.6 Hz, 1H), 7.16-7.09 (m, 1H), 6.74 (d, *J* = 7.8 Hz, 1H), 3.31 (s, 1H), 3.18 (m, 3H), 2.36 (s, 3H), 2.06-1.93 (m, 2H), 0.75 (t, *J* = 7.5 Hz, 3H). <sup>13</sup>C NMR (125 MHz, CDCl<sub>3</sub>) δ 178.4, 141.2, 132.7, 129.9, 129.7, 124.7, 108.1, 77.4, 31.6, 26.2, 21.1, 7.6. HRMS (ESI) *m/z*: [M+Na]<sup>+</sup> Calcd for C<sub>12</sub>H<sub>15</sub>NNaO<sub>2</sub> 228.0995; Found 228.0994.

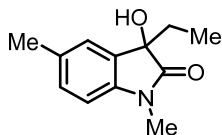

**3-ethyl-5-fluoro-3-hydroxy-1-methylindolin-2-one (1d)**: Purification by flash column chromatography on silica gel (Hexane/EtOAc = 4:1) afforded **1d** as a white solid. 44% yield (0.46 g). m.p. 117-118 °C. <sup>1</sup>H NMR (500 MHz, CDCl<sub>3</sub>) δ 7.17-7.11 (m, 1H), 7.06-6.99 (m, 1H), 6.79-6.74 (m, 1H), 3.96-3.42 (m, 1H), 3.18 (d, *J* = 2.8 Hz, 3H), 2.07-1.92 (m, 2H), 0.78-0.70 (m, 3H). <sup>13</sup>C NMR (125 MHz, CDCl<sub>3</sub>) δ 178.5, 159.7 (d, *J* = 239.5 Hz), 139.5, 131.7, 115.8 (d, *J* = 23.8 Hz), 112.3 (d, *J* = 25.0 Hz), 109.1 (d, *J* = 8.8 Hz), 77.6, 31.7, 26.4, 7.6. <sup>19</sup>F NMR (470 MHz, CDCl<sub>3</sub>) δ -119.69 – -119.85 (m, 1F). HRMS (ESI) *m/z*: [M+H]<sup>+</sup> Calcd for C<sub>11</sub>H<sub>13</sub>FNO<sub>2</sub> 210.0925; Found 210.0927.

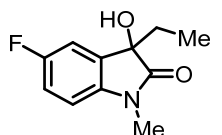

**3-ethyl-3-hydroxy-1-methyl-5-(trifluoromethoxy)indolin-2-one (1e)**: Purification by flash column chromatography on silica gel (Hexane/EtOAc = 3:1) afforded **1e** as a white solid. 30% yield (0.41 g). m.p. 68-69 °C. <sup>1</sup>H NMR (500 MHz, CDCl<sub>3</sub>) δ 7.28 (dd, *J* = 2.4, 1.0 Hz, 1H), 7.23-7.19 (m, 1H), 6.83 (d, *J* = 8.5 Hz, 1H), 3.68-3.43 (m, 1H), 3.20 (s, 3H), 2.07-1.93 (m, 2H), 0.76 (t, *J* = 7.5 Hz, 3H). <sup>13</sup>C NMR (125 MHz, Acetone-*d*<sub>6</sub>) δ 177.3, 144.4, 142.9, 132.9, 122.3, 120.7 (q, *J* = 254.7 Hz), 117.5, 109.0, 76.6, 30.9, 25.4, 6.9. <sup>19</sup>F NMR (470 MHz, CDCl<sub>3</sub>) δ -58.35. HRMS (ESI) *m/z*: [M+H]<sup>+</sup> Calcd for C<sub>12</sub>H<sub>13</sub>F<sub>3</sub>NO<sub>3</sub> 276.0842; Found 276.0842.

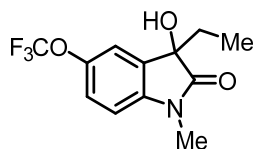



**3-ethyl-3-hydroxy-5-methoxy-1-methylindolin-2-one (1f)**<sup>4</sup>: Purification by flash column chromatography on silica gel (Hexane/EtOAc = 2:1) afforded **1f** as a red solid. 52% yield (0.57 g). <sup>1</sup>H NMR (500 MHz, CDCl<sub>3</sub>) δ 7.00 (d, *J* = 2.5 Hz, 1H), 6.87-6.83 (m, 1H), 6.75 (d, *J* = 8.5 Hz, 1H), 3.81 (s, 3H), 3.18 (d, *J* = 0.9 Hz, 3H), 3.06-2.77 (m, 1H), 2.02-1.93 (m, 2H), 0.74 (t, *J* = 7.4, 3H).

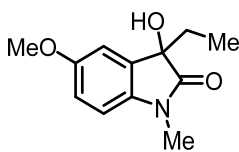

**3-benzyl-3-hydroxy-1-methylindolin-2-one (1g)**<sup>2</sup>: Purification by flash column chromatography on silica gel (Hexane/EtOAc = 2:1) afforded **1g** as a white solid. 70% yield (0.89 g). <sup>1</sup>H NMR (500 MHz, CDCl<sub>3</sub>) δ 7.29-7.24 (m, 1H), 7.19-7.10 (m, 4H), 7.08-7.03 (m, 1H), 6.97-6.93 (m, 2H), 6.65 (d, *J* = 7.8 Hz, 1H), 3.31 (d, *J* = 12.9 Hz, 1H), 3.14 (d, *J* = 12.9 Hz, 1H), 3.01 (s, 3H).

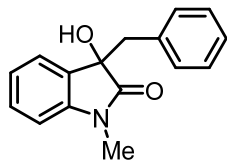

**3-hydroxy-1-methyl-3-(4-methylbenzyl)indolin-2-one (1h)**<sup>2</sup>: Purification by flash column chromatography on silica gel (Hexane/EtOAc = 2:1) afforded **1h** as a white solid. 54% yield (0.72 g). <sup>1</sup>H NMR (500 MHz, CDCl<sub>3</sub>) δ 7.29-7.24 (m, 1H), 7.17 (dd, *J* = 7.3, 1.3 Hz, 1H), 7.07-7.03 (m, 1H), 6.94 (d, *J* = 7.7 Hz, 2H), 6.85 (d, *J* = 7.9 Hz, 2H), 6.67 (d, *J* = 7.7 Hz, 1H), 3.26 (d, *J* = 13.0 Hz, 1H), 3.08 (d, *J* = 13.0 Hz, 1H), 3.03 (s, 3H), 2.87 (s, 1H), 2.25 (s, 3H).

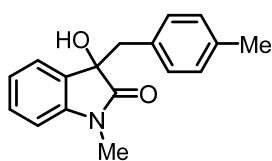

**3-(4-chlorobenzyl)-3-hydroxy-1-methylindolin-2-one (1i)**<sup>2</sup>: Purification by flash column chromatography on silica gel (Hexane/EtOAc = 2:1) afforded **1i** as a white solid. 64% yield (0.92 g). <sup>1</sup>H NMR (400 MHz, CDCl<sub>3</sub>) δ 7.30-7.27 (m, 1H), 7.20-7.04 (m, 4H), 6.91-6.86 (m, 2H), 6.68 (d, *J* = 7.8 Hz, 1H), 3.26 (d, *J* = 12.9 Hz, 1H), 3.09 (d, *J* = 13.0 Hz, 1H), 3.03 (s, 3H), 2.72 (s, 1H).

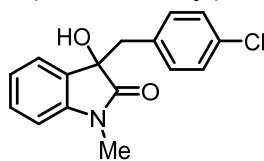

**3-(cyclohexylmethyl)-3-hydroxy-1-methylindolin-2-one (1j)**: Purification by flash column chromatography on silica gel (Hexane/EtOAc = 2:1) afforded **1j** as a light yellow liquid. 36% yield (0.45 g). m.p. 124-126 °C <sup>1</sup>H NMR (500 MHz, CDCl<sub>3</sub>) δ 7.39-7.31 (m, 2H), 7.13-7.08 (m, 1H), 6.84 (d, *J* = 7.8 Hz, 1H), 3.19 (s, 3H), 2.73 (s, 1H), 1.97-1.86 (m, 2H), 1.58-1.43 (m, 5H), 1.17-1.03 (m, 4H), 0.94-0.83 (m, 2H). <sup>13</sup>C NMR (125 MHz, CDCl<sub>3</sub>) δ 178.7, 143.6, 130.3, 129.8, 124.3, 123.2, 108.6, 76.5, 45.8, 34.5, 34.2, 33.5, 26.4, 26.2. HRMS (ESI-ESA) *m/z*: [M]<sup>+</sup> Calcd for C<sub>16</sub>H<sub>22</sub>NO<sub>2</sub> 260.1645; Found 260.1647.

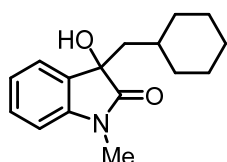

**3-hydroxy-1,3-dimethylindolin-2-one (1k)**<sup>4</sup>: Purification by flash column chromatography on silica gel (Hexane/EtOAc = 4:1) afforded **1k** as an white solid. 50% yield (0.44 g). <sup>1</sup>H NMR (500 MHz, CDCl<sub>3</sub>) δ 7.42 (dd, *J* = 7.3, 1.3 Hz, 1H), 7.33 (td, *J* = 7.8, 1.3 Hz, 1H), 7.11 (td, *J* = 7.5, 1.0 Hz, 1H), 6.84 (d, *J* = 7.7 Hz, 1H), 3.20 (s, 3H), 1.61 (s, 3H).

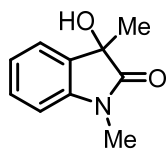

**ethyl 2-(3-hydroxy-1-methyl-2-oxoindolin-3-yl) acetate (1l)**<sup>2</sup>: Purification by flash column chromatography on silica gel (Hexane/EtOAc = 4:1) afforded **1l** as an orange solid. 72% yield (0.90 g). <sup>1</sup>H NMR (500 MHz, CDCl<sub>3</sub>) δ 7.41 (dd, *J* = 7.4, 1.3 Hz, 1H), 7.35 (td, *J* = 7.8, 1.3 Hz, 1H), 7.09 (td, *J* = 7.6, 1.0 Hz, 1H), 6.84 (d, *J* = 7.8 Hz, 1H), 4.49-4.41 (m, 1H), 4.18-4.09 (m, 2H), 3.21 (d, *J* = 1.2 Hz,

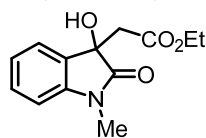

3H), 2.94 (d,  $J = 14.0$  Hz, 1H), 2.90 (d,  $J = 14.0$  Hz, 1H), 1.23-1.16 (m, 3H).

**1,3-diethyl-3-hydroxyindolin-2-one (1m)**<sup>5</sup>: Purification by flash column chromatography on silica gel (Hexane/EtOAc = 4:1) afforded **1m** as a white solid. 52% yield (0.53 g). <sup>1</sup>H NMR (500 MHz, CDCl<sub>3</sub>)  $\delta$  7.38 (dd,  $J = 7.3, 1.3$  Hz, 1H), 7.32 (td,  $J = 7.7, 1.3$  Hz, 1H), 7.10 (t,  $J = 7.5$  Hz, 1H), 6.86 (d,  $J = 7.8$  Hz, 1H), 3.86-3.77 (m, 1H), 3.73-3.64 (m, 1H), 3.14-2.67 (m, 1H), 2.06-1.94 (m, 2H), 1.28-1.25 (m, 3H), 0.74-0.71 (m, 3H).

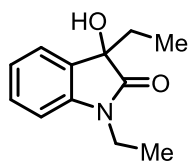

**3-ethyl-3-hydroxy-1-phenylindolin-2-one (1n)**<sup>6</sup>: Purification by flash column chromatography on silica gel (Hexane/EtOAc = 4:1) afforded **1n** as a white solid. 40% yield (0.51 g). <sup>1</sup>H NMR (500 MHz, DMSO-*d*<sub>6</sub>)  $\delta$  7.59 (t,  $J = 7.8$  Hz, 2H), 7.50-7.44 (m, 1H), 7.43-7.37 (m, 3H), 7.27 (td,  $J = 7.7, 1.3$  Hz, 1H), 7.13 (td,  $J = 7.5, 1.0$  Hz, 1H), 6.73 (d,  $J = 7.7$  Hz, 1H), 6.15 (s, 1H), 1.96-1.91 (m, 2H), 0.71 (t,  $J = 7.5$  Hz, 3H). <sup>13</sup>C NMR (125 MHz, DMSO-*d*<sub>6</sub>)  $\delta$  177.6, 143.4, 134.7, 131.5, 130.1, 129.5, 128.4, 127.0, 124.5, 123.4, 109.2, 76.5, 31.5, 8.0.

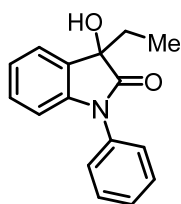

**3-hydroxy-1-methyl-3-phenylindolin-2-one (1o)**<sup>6</sup>: Purification by flash column chromatography on silica gel (DCM/EtOAc = 10:1) afforded **1o** as a yellow solid. 57% yield (0.68 g). <sup>1</sup>H NMR (500 MHz, CDCl<sub>3</sub>)  $\delta$  7.43-7.29 (m, 7H), 7.11 (td,  $J = 7.9, 1.1$  Hz, 1H), 6.93 (d,  $J = 7.9$  Hz, 1H), 3.45 (s, 1H), 3.27 (s, 3H).

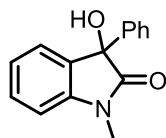

**(3S,8S,9S,10R,13R,14S,17R)-10,13-dimethyl-17-((R)-6-methylheptan-2-yl)-2,3,4,7,8,9,10,11,12,13,14,15,16,17-tetradecahydro-1H-cyclopenta[a]phenanthren-3-yl 4-bromobenzoate (2w)**<sup>3</sup>:

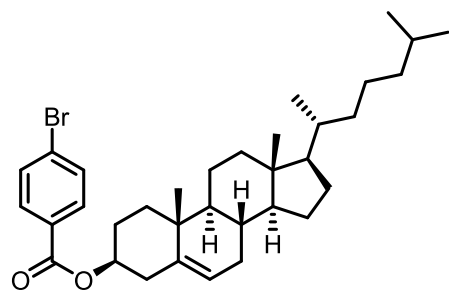

Purification by flash column chromatography on silica gel (Hexane/EtOAc = 4:1) afforded **2w** as a white solid. 90% yield (2.56 g). <sup>1</sup>H NMR (500 MHz, CDCl<sub>3</sub>)  $\delta$  7.90 (d,  $J = 8.6$  Hz, 2H), 7.57 (d,  $J = 8.5$  Hz, 2H), 5.42 (d,  $J = 5.1$  Hz, 1H), 4.88-4.81 (m, 1H), 2.45 (d,  $J = 8.1$  Hz, 2H), 2.06-1.89 (m, 5H), 1.88-1.80 (m, 1H), 1.77-1.68 (m, 1H), 1.60-1.57 (m, 1H), 1.54-1.45 (m, 4H), 1.39-1.22 (m, 8H), 1.21-1.09 (m, 6H), 1.05-0.97 (m, 3H), 0.92 (d,  $J = 6.6$  Hz, 3H), 0.88 (d,  $J = 6.6$  Hz, 3H), 0.86 (d,  $J = 6.6$  Hz, 3H), 0.69 (s, 3H).

## 4.2 Characterization of Products

**1,3-dimethyl-2-phenylquinolin-4(1H)-one (3a)**<sup>7</sup>: Purification by flash column chromatography on silica gel (Hexane/EtOAc = 1:1) afforded **3a** as an orange solid. 86% yield (21.4 mg). <sup>1</sup>H NMR (500 MHz, CDCl<sub>3</sub>)  $\delta$  8.55 (dd,  $J = 8.0, 1.7$  Hz, 1H), 7.68-7.64 (m, 1H), 7.57-7.43 (m, 5H), 7.40-7.36 (m, 1H), 7.28-7.27 (m, 1H), 3.46 (s, 3H), 1.86 (s, 3H).

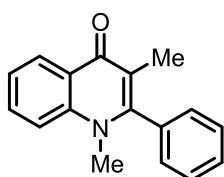

**1,3-dimethyl-2-(*o*-tolyl)quinolin-4(1*H*)-one (3b)**<sup>7</sup>: Purification by flash column chromatography

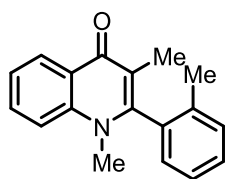

on silica gel (Hexane/EtOAc = 1:1) afforded **3b** as a yellow solid. 47% yield (12.3 mg). <sup>1</sup>H NMR (500 MHz, CDCl<sub>3</sub>) δ 8.59 (dd, *J* = 8.0, 1.7 Hz, 1H), 7.72-7.66 (m, 1H), 7.52 (d, *J* = 8.5 Hz, 1H), 7.44-7.32 (m, 4H), 7.15 (dd, *J* = 7.4, 1.4 Hz, 1H), 3.46 (s, 3H), 2.11 (s, 3H), 1.82 (s, 3H).

**1,3-dimethyl-2-(*m*-tolyl)quinolin-4(1*H*)-one (3c)**: Purification by flash column chromatography

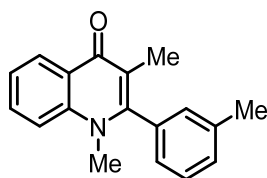

on silica gel (Hexane/EtOAc = 1:1) afforded **3c** as an orange solid. 57% yield (15.0 mg). m.p. 131-132 °C. <sup>1</sup>H NMR (500 MHz, CDCl<sub>3</sub>) δ 8.56 (dd, *J* = 8.0, 1.7 Hz, 1H), 7.70-7.64 (m, 1H), 7.50 (d, *J* = 8.5 Hz, 1H), 7.44-7.37 (m, 2H), 7.33-7.29 (m, 1H), 7.11-7.04 (m, 2H), 3.48 (s, 3H), 2.44 (s, 3H), 1.87 (s, 3H). <sup>13</sup>C NMR (125 MHz, CDCl<sub>3</sub>) δ 177.6, 151.5, 141.1, 139.2, 135.7, 131.9, 129.9, 129.2, 129.0, 127.1, 125.6, 125.2,

123.2, 118.2, 115.6, 37.3, 21.6, 13.5. HRMS (EI-ESA) *m/z*: [M]<sup>+</sup> Calcd for C<sub>18</sub>H<sub>17</sub>NO 263.1305; Found 263.1301.

**2-(3-fluorophenyl)-1,3-dimethylquinolin-4(1*H*)-one (3d)**: Purification by flash column

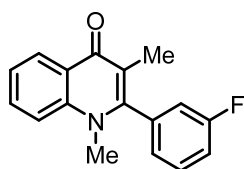

chromatography on silica gel (Hexane/EtOAc = 1:1) afforded **3d** as an orange solid. 84% yield (22.4 mg). m.p. 145-146 °C. <sup>1</sup>H NMR (500 MHz, CDCl<sub>3</sub>) δ 8.54 (dd, *J* = 8.1, 1.7 Hz, 1H), 7.71-7.65 (m, 1H), 7.61-7.47 (m, 2H), 7.43-7.37 (m, 1H), 7.26-7.19 (m, 1H), 7.14-7.00 (m, 2H), 3.48 (s, 3H), 1.86 (s, 3H). <sup>13</sup>C NMR (125 MHz, CDCl<sub>3</sub>) δ 177.5, 163.1 (d, *J* =

246.5 Hz), 149.6, 141.0, 137.6 (d, *J* = 8.0 Hz), 132.1, 131.2 (d, *J* = 8.8 Hz), 127.0, 125.1, 124.5 (d, *J* = 3.3 Hz), 123.3, 118.1, 116.4 (d, *J* = 21.3 Hz), 115.9 (d, *J* = 21.3 Hz), 115.5, 37.3, 13.4. <sup>19</sup>F NMR (470 MHz, CDCl<sub>3</sub>) δ -110.75 – -110.84 (m, 1F). HRMS (EI-ESA) *m/z*: [M]<sup>+</sup> Calcd for C<sub>17</sub>H<sub>14</sub>FNO 267.1054; Found 267.1054.

**1,3-dimethyl-2-(*p*-tolyl)quinolin-4(1*H*)-one (3e)**: Purification by flash column chromatography

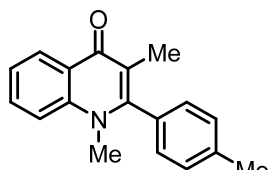

on silica gel (Hexane/EtOAc = 1:1) afforded **3e** as a yellow solid. 90% yield (23.7 mg). m.p. 175-176 °C. <sup>1</sup>H NMR (500 MHz, CDCl<sub>3</sub>) δ 8.55 (dd, *J* = 8.1, 1.7 Hz, 1H), 7.68-7.63 (m, 1H), 7.49 (d, *J* = 8.6 Hz, 1H), 7.40-7.36 (m, 1H), 7.34 (d, *J* = 7.7 Hz, 2H), 7.19-7.12 (m, 2H), 3.47 (s, 3H), 2.46 (s, 3H), 1.87 (s, 3H). <sup>13</sup>C NMR (125 MHz, CDCl<sub>3</sub>) δ 177.5,

151.5, 141.0, 139.1, 132.8, 131.8, 129.9, 128.4, 127.0, 125.1, 123.1, 118.3, 115.6, 37.3, 21.5, 13.5. HRMS (EI-ESA) *m/z*: [M]<sup>+</sup> Calcd for C<sub>18</sub>H<sub>17</sub>NO 263.1305; Found 263.1299.

**2-(4-fluorophenyl)-1,3-dimethylquinolin-4(1*H*)-one (3f)**<sup>7</sup>: Purification by flash column

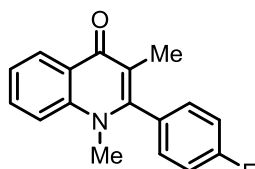

chromatography on silica gel (Hexane/EtOAc = 1:1) afforded **3f** as a white solid. 82% yield (18.7 mg). <sup>1</sup>H NMR (500 MHz, CDCl<sub>3</sub>) δ 8.53 (dd, *J* = 8.1, 1.7 Hz, 1H), 7.70-7.64 (m, 1H), 7.48 (d, *J* = 8.6 Hz, 1H), 7.41-7.36 (m, 1H), 7.30-7.21 (m, 4H), 3.47 (s, 3H), 1.85 (s, 3H). <sup>19</sup>F NMR (470 MHz, CDCl<sub>3</sub>) δ -111.33.

**2-(4-chlorophenyl)-1,3-dimethylquinolin-4(1H)-one (3g):** Purification by flash column

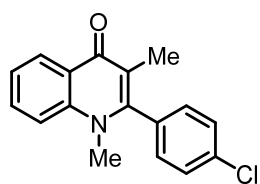

chromatography on silica gel (Hexane/EtOAc = 1:1) afforded **3g** as an orange solid. 79% yield (22.4 mg). m.p. 110-111 °C.  $^1\text{H NMR}$  (500 MHz,  $\text{CDCl}_3$ )  $\delta$  8.53 (dd,  $J = 8.1, 1.7$  Hz, 1H), 7.69-7.64 (m, 1H), 7.57-7.52 (m, 2H), 7.48 (d,  $J = 8.6$  Hz, 1H), 7.41-7.36 (m, 1H), 7.27-7.23 (m, 2H), 3.46 (s, 3H), 1.85 (s, 3H).  $^{13}\text{C NMR}$  (125 MHz,  $\text{CDCl}_3$ )  $\delta$  177.4, 149.9, 141.0, 135.4, 134.0, 132.1, 130.1, 129.6, 127.0, 125.1, 123.3, 118.3, 115.5, 37.3, 13.4. **HRMS** (EI-ESA)  $m/z$ :  $[\text{M}]^+$  Calcd for  $\text{C}_{17}\text{H}_{14}\text{ClNO}$  283.0758; Found 283.0732.

**1,3-dimethyl-2-(4-(trifluoromethyl)phenyl)quinolin-4(1H)-one (3h):** Purification by flash

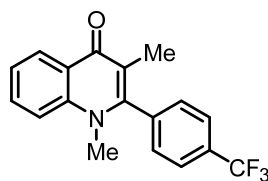

column chromatography on silica gel (Hexane/EtOAc = 1:1) afforded **3h** as a yellow solid. 57% yield (18.1 mg). m.p. 132-133 °C.  $^1\text{H NMR}$  (500 MHz,  $\text{CDCl}_3$ )  $\delta$  8.56 (dd,  $J = 8.1, 1.7$  Hz, 1H), 7.84 (d,  $J = 8.0$  Hz, 2H), 7.72-7.66 (m, 1H), 7.53-7.39 (m, 4H), 3.46 (s, 3H), 1.84 (s, 3H).  $^{13}\text{C NMR}$  (125 MHz,  $\text{CDCl}_3$ )  $\delta$  177.5, 149.5, 141.1, 139.3, 132.3, 131.5 (q,  $J = 28.8$  Hz), 129.3, 127.1, 126.5 (d,  $J = 3.8$  Hz), 125.2, 123.9 (q,  $J = 270$  Hz), 123.5, 118.2, 115.5, 37.5, 13.4.  $^{19}\text{F NMR}$  (470 MHz,  $\text{CDCl}_3$ )  $\delta$  -62.77. **HRMS** (EI-ESA)  $m/z$ :  $[\text{M}]^+$  Calcd for  $\text{C}_{18}\text{H}_{14}\text{F}_3\text{NO}$  317.1022; Found 317.0993.

**2-(4-methoxyphenyl)-1,3-dimethylquinolin-4(1H)-one (3i):** Purification by flash column

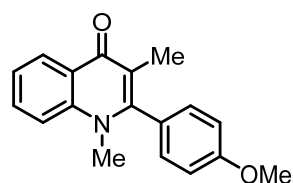

chromatography on silica gel (Hexane/EtOAc = 2:3) afforded **3i** as a red solid. 71% yield (19.8 mg).  $^1\text{H NMR}$  (500 MHz,  $\text{CDCl}_3$ )  $\delta$  8.54 (dd,  $J = 8.1, 1.7$  Hz, 1H), 7.68-7.63 (m, 1H), 7.49 (d,  $J = 8.5$  Hz, 1H), 7.40-7.35 (m, 1H), 7.22-7.16 (m, 2H), 7.09-7.02 (m, 2H), 3.90 (s, 3H), 3.48 (s, 3H), 1.88 (s, 3H).

**1,3-dimethyl-2-(4-(trifluoromethoxy)phenyl)quinolin-4(1H)-one (3j):** Purification by flash

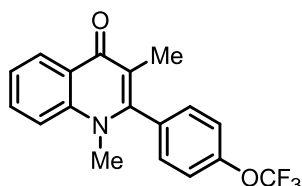

column chromatography on silica gel (Hexane/EtOAc = 2:3) afforded **3j** as a light red solid. 92% yield (30.6 mg). m.p. 134-135 °C.  $^1\text{H NMR}$  (500 MHz,  $\text{CDCl}_3$ )  $\delta$  8.53 (dd,  $J = 8.0, 1.7$  Hz, 1H), 7.70-7.64 (m, 1H), 7.48 (d,  $J = 8.6$  Hz, 1H), 7.44-7.33 (m, 5H), 3.47 (s, 3H), 1.84 (s, 3H).  $^{13}\text{C NMR}$  (125 MHz,  $\text{CDCl}_3$ )  $\delta$  177.4, 149.7, 141.0, 134.2, 132.1, 130.4, 127.0, 125.1, 123.3, 121.7, 120.5 (q,  $J = 256.3$  Hz), 118.4, 115.6, 37.4, 13.5.  $^{19}\text{F NMR}$  (470 MHz,  $\text{CDCl}_3$ )  $\delta$  -57.75. **HRMS** (EI-ESA)  $m/z$ :  $[\text{M}]^+$  Calcd for  $\text{C}_{18}\text{H}_{14}\text{F}_3\text{NO}_2$  333.0971; Found 333.0971.

**1,3-dimethyl-2-(4-(trimethylsilyl)phenyl)quinolin-4(1H)-one (3k):** Purification by flash column

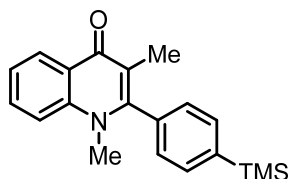

chromatography on silica gel (Hexane/EtOAc = 1:1) afforded **3k** as a yellow solid. 95% yield (30.5 mg). m.p. 154-155 °C.  $^1\text{H NMR}$  (500 MHz,  $\text{CDCl}_3$ )  $\delta$  8.54 (dd,  $J = 8.1, 1.7$  Hz, 1H), 7.71-7.61 (m, 3H), 7.49 (d,  $J = 8.6$  Hz, 1H), 7.41-7.35 (m, 1H), 7.26-7.23 (m, 2H), 3.47 (s, 3H), 1.86 (s, 3H), 0.34 (s, 9H).  $^{13}\text{C NMR}$  (125 MHz,  $\text{CDCl}_3$ )  $\delta$  177.5, 151.3, 142.0, 141.0, 135.9, 134.1, 131.9, 127.7, 126.9, 125.1, 123.1, 118.1, 115.6, 37.4, 13.5, -1.1. **HRMS** (EI-ESA)  $m/z$ :  $[\text{M}]^+$  Calcd for  $\text{C}_{20}\text{H}_{23}\text{NOSi}$  321.1543; Found 321.1534.

**2-([1,1'-biphenyl]-4-yl)-1,3-dimethylquinolin-4(1H)-one (3l):** Purification by flash column chromatography on silica gel (Hexane/EtOAc = 1:1) afforded **3l** as a yellow solid. 90% yield (29.2 mg). m.p. > 200 °C. <sup>1</sup>H NMR (500 MHz, CDCl<sub>3</sub>) δ 8.58 (dd, *J* = 8.1, 1.7 Hz, 1H), 7.77 (d, *J* = 8.2 Hz, 2H), 7.71-7.66 (m, 3H), 7.54-7.48 (m, 3H), 7.45-7.38 (m, 2H), 7.38-7.34 (m, 2H), 3.53 (s, 3H), 1.93 (s, 3H). <sup>13</sup>C NMR (125 MHz, CDCl<sub>3</sub>) δ 177.5, 151.1, 142.1, 141.1, 140.1, 134.6, 132.0, 129.1, 129.1, 128.1, 127.9, 127.3, 127.1, 125.2, 123.3, 118.4, 115.6, 37.5, 13.6. HRMS (EI-ESA) *m/z*: [M]<sup>+</sup> Calcd for C<sub>23</sub>H<sub>19</sub>NO 325.1461; Found 325.1461.

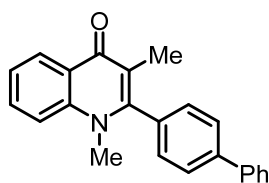

**2-(3,5-dimethylphenyl)-1,3-dimethylquinolin-4(1H)-one (3m):** Purification by flash column chromatography on silica gel (Hexane/EtOAc = 1:1) afforded **3m** as a white solid. 91% yield (25.2 mg). m.p. 160-161 °C. <sup>1</sup>H NMR (500 MHz, CDCl<sub>3</sub>) δ 8.55 (dd, *J* = 8.1, 1.7 Hz, 1H), 7.68-7.62 (m, 1H), 7.49 (d, *J* = 8.6 Hz, 1H), 7.42-7.35 (m, 1H), 7.12 (d, *J* = 1.9 Hz, 1H), 6.87 (d, *J* = 1.7 Hz, 2H), 3.47 (s, 3H), 2.40 (s, 6H), 1.87 (s, 3H). <sup>13</sup>C NMR (125 MHz, CDCl<sub>3</sub>) δ 177.5, 151.7, 141.0, 138.9, 135.6, 131.8, 130.7, 127.0, 126.1, 125.1, 123.0, 118.0, 115.5, 37.3, 21.5, 13.5. HRMS (EI-ESA) *m/z*: [M]<sup>+</sup> Calcd for C<sub>19</sub>H<sub>19</sub>NO 277.1461; Found 277.1442.

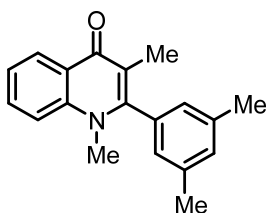

**1,3-dimethyl-2-(naphthalen-2-yl)quinolin-4(1H)-one (3n):** Purification by flash column chromatography on silica gel (Hexane/EtOAc = 1:1) afforded **3n** as a black solid. 64% yield (19.1 mg). m.p. > 200 °C. <sup>1</sup>H NMR (500 MHz, CDCl<sub>3</sub>) δ 8.58 (dd, *J* = 8.2, 1.7 Hz, 1H), 8.02 (d, *J* = 8.4 Hz, 1H), 7.98-7.89 (m, 2H), 7.81-7.77 (m, 1H), 7.72-7.65 (m, 1H), 7.64-7.57 (m, 2H), 7.51 (d, *J* = 8.6 Hz, 1H), 7.43-7.34 (m, 2H), 3.49 (s, 3H), 1.89 (s, 3H). <sup>13</sup>C NMR (125 MHz, CDCl<sub>3</sub>) δ 177.5, 151.8, 150.3, 148.0, 141.1, 136.5, 133.8, 132.1, 130.9, 129.6, 128.3, 128.1, 127.1, 125.2, 123.3, 122.3, 118.5, 115.6, 37.5, 13.5. HRMS (EI-ESA) *m/z*: [M]<sup>+</sup> Calcd for C<sub>21</sub>H<sub>17</sub>NO 299.1305; Found 299.1290.

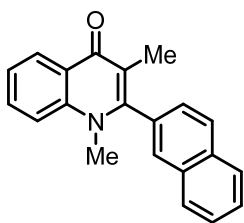

**2-(2,3-dihydrobenzofuran-5-yl)-1,3-dimethylquinolin-4(1H)-one (3o):** Purification by flash column chromatography on silica gel (Hexane/EtOAc = 1:1) afforded **3o** as a brown solid. 70% yield (20.4 mg). m.p. 197-198 °C. <sup>1</sup>H NMR (500 MHz, CDCl<sub>3</sub>) δ 8.54 (dd, *J* = 8.1, 1.7 Hz, 1H), 7.770-7.62 (m, 1H), 7.49 (d, *J* = 8.6 Hz, 1H), 7.40-7.35 (m, 1H), 7.08 (d, *J* = 1.5 Hz, 1H), 6.99 (dd, *J* = 8.1, 1.9 Hz, 1H), 6.92 (d, *J* = 8.1 Hz, 1H), 4.68 (td, *J* = 8.7, 1.3 Hz, 2H), 3.50 (s, 3H), 3.31 (td, *J* = 8.7, 2.6 Hz, 2H), 1.90 (s, 3H). <sup>13</sup>C NMR (125 MHz, CDCl<sub>3</sub>) δ 177.5, 160.7, 151.6, 141.0, 131.8, 128.6, 128.2, 127.8, 126.9, 125.2, 125.1, 123.1, 118.6, 115.6, 109.9, 71.7, 37.3, 29.7, 13.6. HRMS (EI-ESA) *m/z*: [M]<sup>+</sup> Calcd for C<sub>19</sub>H<sub>17</sub>NO<sub>2</sub> 291.1254; Found 291.1226.

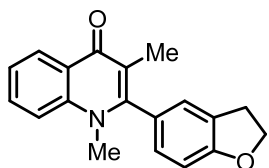

**2-(benzo[d][1,3]dioxol-5-yl)-1,3-dimethylquinolin-4(1H)-one (3p):** Purification by flash column chromatography on silica gel (Hexane/EtOAc = 2:3) afforded **3p** as a white solid. 68% yield (19.9 mg). m.p. > 200 °C. <sup>1</sup>H NMR (500 MHz, CDCl<sub>3</sub>) δ 8.53 (dd, *J* = 8.1, 1.7 Hz, 1H), 7.69-7.62 (m, 1H), 7.49 (d, *J* = 8.6 Hz, 1H), 7.42-7.34 (m, 1H), 6.97 (d, *J* = 8.2 Hz, 1H), 6.76-6.71 (m,

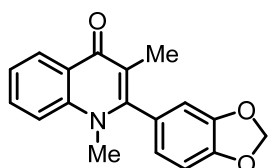

2H), 6.08 (s, 2H), 3.51 (s, 3H), 1.90 (s, 3H).  $^{13}\text{C}$  NMR (125 MHz,  $\text{CDCl}_3$ )  $\delta$  177.5, 150.8, 148.4, 148.2, 141.0, 131.9, 129.2, 127.0, 125.1, 123.2, 122.4, 118.5, 115.6, 109.1, 109.0, 101.7, 37.2, 13.5. HRMS (EI-ESA)  $m/z$ :  $[\text{M}]^+$  Calcd for  $\text{C}_{18}\text{H}_{15}\text{NO}_3$  293.1046; Found 293.1030.

**2-(benzo[*b*]thiophen-5-yl)-1,3-dimethylquinolin-4(1*H*)-one (3q):** Purification by flash column chromatography on silica gel (Hexane/EtOAc = 2:3) afforded **3q** as a yellow solid. 80% yield (24.4 mg). m.p. > 200 °C.

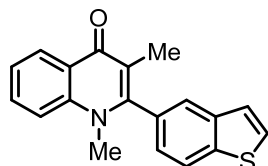

$^1\text{H}$  NMR (500 MHz,  $\text{CDCl}_3$ )  $\delta$  8.58 (dd,  $J = 8.1, 1.7$  Hz, 1H), 8.05 (d,  $J = 8.2$  Hz, 1H), 7.74 (d,  $J = 1.6$  Hz, 1H), 7.71-7.65 (m, 1H), 7.60 (d,  $J = 5.4$  Hz, 1H), 7.51 (d,  $J = 8.6$  Hz, 1H), 7.45-7.38 (m, 2H), 7.24 (dd,  $J = 8.2, 1.6$  Hz, 1H), 3.48 (s, 3H), 1.88 (s, 3H).  $^{13}\text{C}$  NMR (125 MHz,  $\text{CDCl}_3$ )  $\delta$  177.5, 151.3, 141.1, 140.4, 140.0, 131.9, 131.7, 128.3, 127.0, 125.2, 124.3, 124.0, 123.7, 123.5, 123.2, 118.6, 115.6, 37.4, 13.6. HRMS (EI-ESA)  $m/z$ :  $[\text{M}]^+$  Calcd for  $\text{C}_{19}\text{H}_{15}\text{NOS}$  305.0869; Found 305.0850.

**1,3-dimethyl-[2,6'-biquinolin]-4(1*H*)-one (3r):** Purification by flash column chromatography on silica gel (Hexane/EtOAc = 2:3) afforded **3r** as an orange solid. 67% yield (20.1 mg). m.p. > 200 °C.

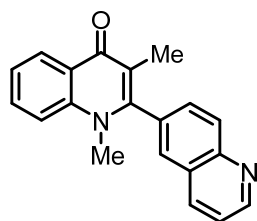

$^1\text{H}$  NMR (500 MHz,  $\text{CDCl}_3$ )  $\delta$  9.05 (dd,  $J = 4.3, 1.7$  Hz, 1H), 8.57 (dd,  $J = 8.1, 1.7$  Hz, 1H), 8.34- 8.24 (m, 2H), 7.81 (d,  $J = 1.9$  Hz, 1H), 7.74-7.66 (m, 1H), 7.63 (dd,  $J = 8.6, 2.0$  Hz, 1H), 7.58-7.48 (m, 2H), 7.44-7.39 (m, 1H), 3.50 (s, 3H), 1.88 (s, 3H).  $^{13}\text{C}$  NMR (125 MHz,  $\text{CDCl}_3$ )  $\delta$  177.6, 151.2, 141.1, 133.2, 133.0, 132.0, 129.3, 128.4, 128.1, 127.3, 127.2, 127.1, 125.8, 125.2, 123.2, 118.5, 115.6, 37.5, 13.6. HRMS (EI-ESA)  $m/z$ :  $[\text{M}]^+$  Calcd for  $\text{C}_{20}\text{H}_{16}\text{N}_2\text{O}$  300.1257; Found 300.1233.

**2-(benzofuran-5-yl)-1,3-dimethylquinolin-4(1*H*)-one (3s):** Purification by flash column chromatography on silica gel (Hexane/EtOAc = 2:3) afforded **3s** as a deep red solid. 64% yield (18.5 mg). m.p. 172-173 °C.

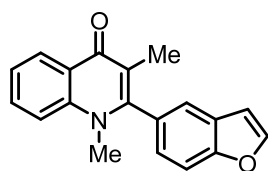

$^1\text{H}$  NMR (500 MHz,  $\text{CDCl}_3$ )  $\delta$  8.57 (dd,  $J = 8.1, 1.7$  Hz, 1H), 7.76 (d,  $J = 2.1$  Hz, 1H), 7.70-7.65 (m, 2H), 7.54-7.48 (m, 2H), 7.43-7.37 (m, 1H), 7.19 (dd,  $J = 8.4, 1.8$  Hz, 1H), 6.87 (dd,  $J = 2.2, 1.0$  Hz, 1H), 3.47 (s, 3H), 1.87 (s, 3H).  $^{13}\text{C}$  NMR (125 MHz,  $\text{CDCl}_3$ )  $\delta$  177.5, 154.9, 151.5, 146.5, 141.0, 131.9, 130.4, 128.2, 127.0, 125.2, 124.7, 123.2, 121.5, 118.7, 115.6, 112.4, 106.9, 37.4, 13.6. HRMS (EI-ESA)  $m/z$ :  $[\text{M}]^+$  Calcd for  $\text{C}_{19}\text{H}_{15}\text{NO}_2$  289.1097; Found 289.1069.

**1,3-dimethyl-2-(1-methyl-1*H*-indol-5-yl)quinolin-4(1*H*)-one (3t):** Purification by flash column chromatography on silica gel (Hexane/EtOAc = 2:3) afforded **3t** as a white solid. 81% yield (24.5 mg). m.p. > 200 °C.

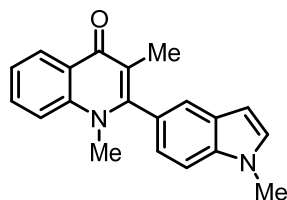

$^1\text{H}$  NMR (500 MHz,  $\text{CDCl}_3$ )  $\delta$  8.58 (dd,  $J = 8.1, 1.7$  Hz, 1H), 7.69-7.62 (m, 1H), 7.53-7.45 (m, 3H), 7.42-7.36 (m, 1H), 7.18 (d,  $J = 3.1$  Hz, 1H), 7.07 (dd,  $J = 8.4, 1.6$  Hz, 1H), 6.56 (dd,  $J = 3.1, 0.8$  Hz, 1H), 3.87 (s, 3H), 3.47 (s, 3H), 1.89 (s, 3H).  $^{13}\text{C}$  NMR (125 MHz,  $\text{CDCl}_3$ )  $\delta$  177.5, 152.9, 141.0, 136.6, 131.7, 130.3, 128.6, 126.9, 126.7, 125.2, 122.9, 121.7, 121.1, 118.7, 115.7, 110.0, 101.5, 37.4, 33.1, 13.7. HRMS (EI-ESA)  $m/z$ :  $[\text{M}]^+$  Calcd for  $\text{C}_{20}\text{H}_{18}\text{N}_2\text{O}$  302.1414; Found 302.1398.

**2-(dibenzo[*b,d*]thiophen-1-yl)-1,3-dimethylquinolin-4(1*H*)-one (3u):** Purification by flash

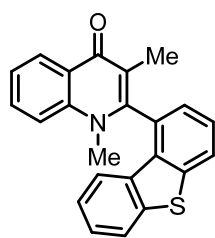

column chromatography on silica gel (Hexane/EtOAc = 2:3) afforded **3u** as a yellow solid. 83% yield (29.5 mg). m.p. > 200 °C. <sup>1</sup>H NMR (500 MHz, CDCl<sub>3</sub>) δ 8.59 (dd, *J* = 8.1, 1.7 Hz, 1H), 8.20-8.15 (m, 1H), 8.10-8.07 (m, 1H), 8.03 (d, *J* = 8.1 Hz, 1H), 7.94-7.90 (m, 1H), 7.72-7.67 (m, 1H), 7.56-7.48 (m, 3H), 7.45-7.40 (m, 1H), 7.36 (dd, *J* = 8.1, 1.7 Hz, 1H), 3.52 (s, 3H), 1.91 (s, 3H). <sup>13</sup>C NMR (125 MHz, CDCl<sub>3</sub>) δ 177.6, 151.1, 141.1, 140.3, 140.0, 136.3, 135.0, 132.1, 132.0, 127.7, 127.1, 126.7, 125.2, 124.9, 123.8, 123.3, 123.2, 122.0, 121.7, 118.7, 115.6, 37.5, 13.7. HRMS (EI-ESA) *m/z*: [M]<sup>+</sup> Calcd for C<sub>23</sub>H<sub>17</sub>NOS 355.1025; Found 355.1011.

**1,3-dimethyl-2-(thiophen-3-yl)quinolin-4(1*H*)-one (3v):** Purification by flash column

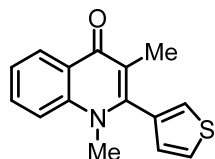

chromatography on silica gel (Hexane/EtOAc = 1:2) afforded **3v** as a yellow solid. 51% yield (13.0 mg). m.p. 85-86 °C. <sup>1</sup>H NMR (500 MHz, CDCl<sub>3</sub>) δ 8.53 (dd, *J* = 8.1, 1.7 Hz, 1H), 7.69-7.64 (m, 1H), 7.55 (dd, *J* = 4.9, 2.9 Hz, 1H), 7.48 (d, *J* = 8.6 Hz, 1H), 7.42-7.36 (m, 1H), 7.34 (dd, *J* = 2.9, 1.3 Hz, 1H), 7.06 (dd, *J* = 4.9, 1.3 Hz, 1H), 3.51 (s, 3H), 1.91 (s, 3H). <sup>13</sup>C NMR (125 MHz, CDCl<sub>3</sub>) δ 177.4, 146.7, 141.1, 135.6, 132.0, 127.8, 127.4, 127.0, 125.3, 125.1, 123.2, 119.3, 115.6, 37.2, 13.5. HRMS (EI-ESA) *m/z*: [M]<sup>+</sup> Calcd for C<sub>15</sub>H<sub>13</sub>NOS 255.0712; Found 255.0710.

**(3*S*,8*S*,9*S*,10*R*,13*R*,14*S*,17*R*)-10,13-dimethyl-17-((*R*)-6-methylheptan-2-yl)-**

**2,3,4,7,8,9,10,11,12,13,14,15,16,17-tetradecahydro-1*H*-cyclopenta[*a*]phenanthren-3-yl**

**4-(1,3-dimethyl-4-oxo-1,4-dihydroquinolin-2-yl)benzoate (3w):** Purification by flash column

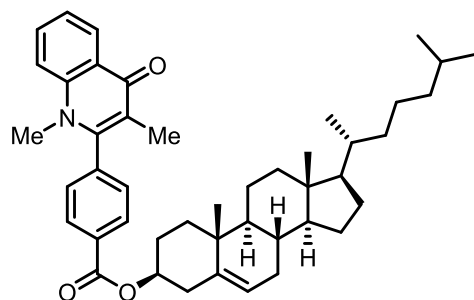

chromatography on silica gel (Hexane/EtOAc = 1:1) afforded **3w** as a white solid. 60% yield (39.7 mg). m.p. > 200 °C. <sup>1</sup>H NMR (500 MHz, CDCl<sub>3</sub>) δ 8.56 (d, *J* = 8.1 Hz, 1H), 8.24 (d, *J* = 8.1 Hz, 2H), 7.70 (dd, *J* = 8.7, 6.9 Hz, 1H), 7.50 (d, *J* = 8.6 Hz, 1H), 7.45-7.37 (m, 3H), 5.47-5.43 (m, 1H), 4.97-4.88 (m, 1H), 3.46 (s, 3H), 2.51 (d, *J* = 8.1 Hz, 2H), 2.09-1.92 (m, 5H), 1.85 (s, 3H), 1.79-1.74 (m, 1H), 1.63-1.47 (m, 6H), 1.38-1.32 (m, 3H), 1.31-1.20 (m, 5H), 1.17-1.11 (m, 3H), 1.09 (s, 3H), 1.06-0.98 (m, 3H), 0.93 (d, *J* = 6.5 Hz, 3H), 0.87 (d, *J* = 6.6 Hz, 3H), 0.87 (d, *J* = 6.6 Hz, 3H), 0.70 (s, 3H). <sup>13</sup>C NMR (125 MHz, CDCl<sub>3</sub>) δ 177.5, 165.3, 150.2, 141.1, 139.9, 139.6, 132.2, 131.8, 130.6, 128.8, 127.2, 125.3, 123.5, 123.2, 118.1, 115.5, 75.3, 56.8, 56.3, 50.2, 42.5, 39.9, 39.7, 38.4, 37.4, 37.2, 36.8, 36.3, 35.9, 32.1, 32.0, 28.4, 28.2, 28.0, 24.5, 24.0, 23.0, 22.7, 21.2, 19.5, 18.9, 13.4, 12.0. HRMS (ESI) *m/z*: [M+H]<sup>+</sup> Calcd for C<sub>45</sub>H<sub>60</sub>NO<sub>3</sub> 662.4568; Found 662.4570.

**1,3,5-trimethyl-2-(4-(trimethylsilyl)phenyl)quinolin-4(1*H*)-one (3x):** Purification by flash

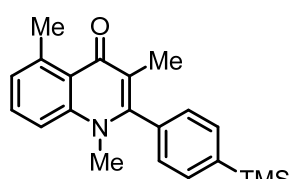

column chromatography on silica gel (Hexane/EtOAc = 1:1) afforded **3x** as a yellow solid. 23% yield (7.7 mg). m.p. 150-151 °C. <sup>1</sup>H NMR (500 MHz, CDCl<sub>3</sub>) δ 7.68-7.64 (m, 2H), 7.49 (dd, *J* = 8.7, 7.2 Hz, 1H), 7.34 (d, *J* = 8.6 Hz, 1H), 7.27-7.23 (m, 2H), 7.14-7.09 (m, 1H), 3.43 (s, 3H), 3.04 (s, 3H), 1.82 (s, 3H), 0.33 (s, 9H). <sup>13</sup>C NMR (125 MHz,

CDCl<sub>3</sub>)  $\delta$  180.1, 150.0, 142.9, 141.9, 141.9, 136.2, 134.1, 130.9, 127.8, 126.2, 123.9, 119.3, 113.6, 38.2, 24.7, 13.7, -1.0. **HRMS** (EI-ESA)  $m/z$ : [M]<sup>+</sup> Calcd for C<sub>21</sub>H<sub>25</sub>NOSi 335.1700; Found 335.1697.

**1,3,6-trimethyl-2-(4-(trimethylsilyl)phenyl)quinolin-4(1H)-one (3y)**: Purification by flash column chromatography on silica gel (Hexane/EtOAc = 1:1)

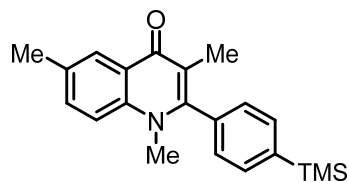

afforded **3y** as an orange solid. 91% yield (30.5 mg). m.p. 160-161 °C. **<sup>1</sup>H NMR** (500 MHz, CDCl<sub>3</sub>)  $\delta$  8.37-8.32 (m, 1H), 7.69-7.64 (m, 2H), 7.48 (dd,  $J$  = 8.7, 2.2 Hz, 1H), 7.40 (d,  $J$  = 8.7 Hz, 1H), 7.26-7.22 (m, 2H), 3.45 (s, 3H), 2.49 (s, 3H), 1.86 (s, 3H), 0.34 (s, 9H). **<sup>13</sup>C NMR** (125 MHz, CDCl<sub>3</sub>)  $\delta$  177.3, 151.0, 141.9, 139.2, 136.0, 134.0, 133.3, 132.9, 127.7, 126.2, 125.0, 117.8, 115.5, 37.4, 21.0, 13.6, -1.1. **HRMS** (EI-ESA)  $m/z$ : [M]<sup>+</sup> Calcd for C<sub>21</sub>H<sub>25</sub>NOSi 335.1700; Found 335.1676.

**6-fluoro-1,3-dimethyl-2-(4-(trimethylsilyl)phenyl)quinolin-4(1H)-one (3z)**: Purification by

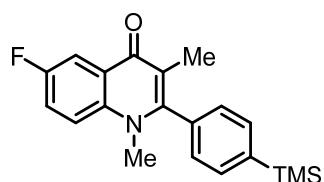

flash column chromatography on silica gel (Hexane/EtOAc = 1:1) afforded **3z** as an orange solid. 69% yield (23.4 mg). m.p. > 200 °C. **<sup>1</sup>H NMR** (500 MHz, CDCl<sub>3</sub>)  $\delta$  8.18 (dd,  $J$  = 9.1, 3.1 Hz, 1H), 7.72-7.65 (m, 2H), 7.50 (dd,  $J$  = 9.4, 4.2 Hz, 1H), 7.42-7.37 (m, 1H), 7.25 (d,  $J$  = 7.9 Hz, 2H), 3.49 (s, 3H), 1.86 (s, 3H), 0.34 (s, 9H). **<sup>13</sup>C NMR** (125 MHz, CDCl<sub>3</sub>)  $\delta$  176.8, 160.0 (d,  $J$  = 242.6 Hz), 151.6, 142.3, 137.7, 135.7, 134.2, 127.7, 126.6 (d,  $J$  = 25.4 Hz), 120.5 (d,  $J$  = 25.0 Hz), 117.9 (d,  $J$  = 7.5 Hz), 117.8, 111.4 (d,  $J$  = 21.3 Hz), 37.8, 13.6, -1.0. **<sup>19</sup>F NMR** (470 MHz, CDCl<sub>3</sub>)  $\delta$  -118.60 – -118.81 (m, 1H). **HRMS** (EI-ESA)  $m/z$ : [M]<sup>+</sup> Calcd for C<sub>20</sub>H<sub>22</sub>FNOSi 339.1449; Found 339.1435.

**1,3-dimethyl-6-(trifluoromethoxy)-2-(4-(trimethylsilyl)phenyl)quinolin-4(1H)-one (3aa)**:

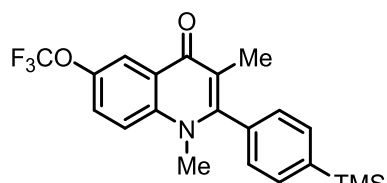

Purification by flash column chromatography on silica gel (Hexane/EtOAc = 1:2) afforded **3aa** as a yellow solid. 85% yield (34.4 mg). m.p. > 200 °C. **<sup>1</sup>H NMR** (500 MHz, CDCl<sub>3</sub>)  $\delta$  8.40 (t,  $J$  = 1.9 Hz, 1H), 7.72-7.67 (m, 2H), 7.57-7.49 (m, 2H), 7.26-7.23 (m, 2H), 3.49 (s, 3H), 1.86 (s, 3H), 0.34 (s, 9H). **<sup>13</sup>C NMR** (125 MHz, CDCl<sub>3</sub>)  $\delta$  176.8, 151.7, 145.0, 142.4, 139.4, 135.5, 134.2, 127.6, 125.4, 120.7 (q,  $J$  = 256.3 Hz), 118.4, 117.7, 37.7, 13.6, -1.0. **<sup>19</sup>F NMR** (470 MHz, CDCl<sub>3</sub>)  $\delta$  -58.01. **HRMS** (EI-ESA)  $m/z$ : [M]<sup>+</sup> Calcd for C<sub>21</sub>H<sub>22</sub>F<sub>3</sub>NO<sub>2</sub>Si 405.1366; Found 405.1349.

**6-methoxy-1,3-dimethyl-2-(4-(trimethylsilyl)phenyl)quinolin-4(1H)-one (3ab)**: Purification by

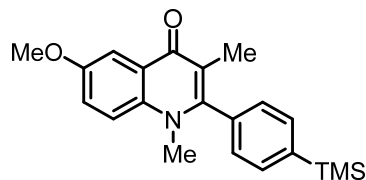

flash column chromatography on silica gel (Hexane/EtOAc = 2:3) afforded **3ab** as a white solid. 75% yield (26.3 mg). m.p. 192-193 °C. **<sup>1</sup>H NMR** (500 MHz, CDCl<sub>3</sub>)  $\delta$  7.96 (d,  $J$  = 3.1 Hz, 1H), 7.70-7.65 (m, 2H), 7.46 (d,  $J$  = 9.3 Hz, 1H), 7.30 (dd,  $J$  = 9.3, 2.8 Hz, 1H), 7.26-7.23 (m, 2H), 3.96 (s, 3H), 3.48 (s, 3H), 1.88 (s, 3H), 0.34 (s, 9H). **<sup>13</sup>C NMR** (125 MHz, CDCl<sub>3</sub>)  $\delta$  176.8, 156.0, 150.7, 142.0, 136.0, 135.8, 134.1, 127.8, 122.7, 117.4, 105.7, 55.9, 37.6, 13.6, -1.0. **HRMS** (EI-ESA)  $m/z$ : [M]<sup>+</sup> Calcd for C<sub>21</sub>H<sub>25</sub>NO<sub>2</sub>Si 351.1649; Found 351.1620.



**1-methyl-3-phenyl-2-(4-(trimethylsilyl)phenyl)quinolin-4(1H)-one (3ac):** Purification by flash

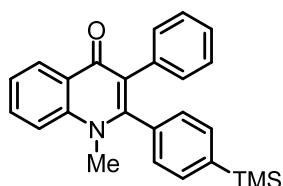

column chromatography on silica gel (Hexane/EtOAc = 1:1) afforded **3ac** as a white solid. 90% yield (34.5 mg). m.p. 196-197 °C.  $^1\text{H NMR}$  (400 MHz,  $\text{CDCl}_3$ )  $\delta$  8.61-8.56 (m, 1H), 7.76-7.68 (m, 1H), 7.57 (d,  $J = 8.7$  Hz, 1H), 7.47-7.37 (m, 3H), 7.15-7.00 (m, 7H), 3.54 (d,  $J = 1.9$  Hz, 3H), 0.23 (d,  $J = 1.9$  Hz, 9H).  $^{13}\text{C NMR}$  (125 MHz,  $\text{CDCl}_3$ )  $\delta$  176.4, 152.3, 141.62, 141.56, 135.8, 135.3, 133.2, 132.4, 131.5, 128.9, 127.6, 127.5, 126.7, 126.2, 124.3, 123.7, 115.9, 37.9, -1.1. **HRMS** (EI-ESA)  $m/z$ :  $[\text{M}]^+$  Calcd for  $\text{C}_{25}\text{H}_{25}\text{NOSi}$  383.1700; Found 383.1681.

**1-methyl-3-(p-tolyl)-2-(4-(trimethylsilyl)phenyl)quinolin-4(1H)-one (3ad):** Purification by

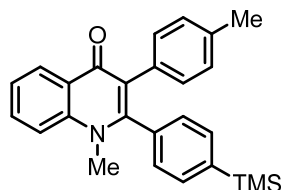

flash column chromatography on silica gel (Hexane/EtOAc = 1:1) afforded **3ad** as a white solid. 77% yield (30.6 mg). m.p. 147-149 °C.  $^1\text{H NMR}$  (500 MHz,  $\text{CDCl}_3$ )  $\delta$  8.58 (dd,  $J = 8.1, 1.7$  Hz, 1H), 7.75-7.68 (m, 1H), 7.56 (d,  $J = 8.6$  Hz, 1H), 7.45-7.39 (m, 3H), 7.15-7.10 (m, 2H), 6.91 (s, 4H), 3.53 (s, 3H), 2.21 (s, 3H), 0.24 (s, 9H).  $^{13}\text{C NMR}$  (125 MHz,  $\text{CDCl}_3$ )  $\delta$  176.5, 152.2, 141.53, 141.48, 135.6, 135.50, 133.2, 132.6, 132.3, 131.3, 128.9, 128.3, 127.6, 126.7, 124.3, 123.6, 115.9, 37.9, 21.3, -1.1. **HRMS** (ESI-ESA)  $m/z$ :  $[\text{M}]^+$  Calcd for  $\text{C}_{26}\text{H}_{28}\text{NOSi}$  398.1935; Found 398.1933.

**3-(4-chlorophenyl)-1-methyl-2-(4-(trimethylsilyl)phenyl)quinolin-4(1H)-one (3ae):**

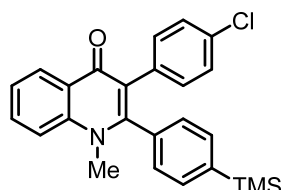

Purification by flash column chromatography on silica gel (Hexane/EtOAc = 1:1) afforded **3ae** as a white solid. 81% yield (33.9 mg). m.p. 188-190 °C.  $^1\text{H NMR}$  (500 MHz,  $\text{CDCl}_3$ )  $\delta$  8.57 (dd,  $J = 8.1, 1.6$  Hz, 1H), 7.76-7.71 (m, 1H), 7.58 (d,  $J = 8.6$  Hz, 1H), 7.48-7.41 (m, 3H), 7.14-7.06 (m, 4H), 7.01-6.94 (m, 2H), 3.54 (s, 3H), 0.26 (s, 9H).  $^{13}\text{C NMR}$  (125 MHz,  $\text{CDCl}_3$ )  $\delta$  176.2, 152.4, 142.1, 141.5, 135.0, 134.3, 133.4, 132.9, 132.6, 132.0, 128.7, 127.8, 127.5, 126.6, 123.9, 123.0, 116.0, 37.9, -1.1. **HRMS** (ESI-ESA)  $m/z$ :  $[\text{M}]^+$  Calcd for  $\text{C}_{25}\text{H}_{25}\text{ClNOSi}$  418.1388; Found 418.1388.

**3-cyclohexyl-1-methyl-2-(4-(trimethylsilyl)phenyl)quinolin-4(1H)-one (3af):** Purification by

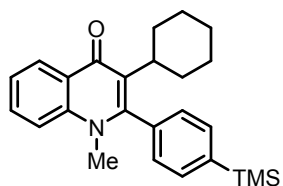

flash column chromatography on silica gel (Hexane/EtOAc = 1:1) afforded **3af** as a white solid. 78% yield (30.3 mg). m.p. 173-175 °C.  $^1\text{H NMR}$  (400 MHz,  $\text{CDCl}_3$ )  $\delta$  8.52 (d,  $J = 7.9$  Hz, 1H), 7.65 (t,  $J = 8.5$  Hz, 3H), 7.45 (d,  $J = 8.7$  Hz, 1H), 7.37 (t,  $J = 7.6$  Hz, 1H), 7.23 (d,  $J = 7.4$  Hz, 2H), 3.38 (s, 3H), 2.43 (q,  $J = 13.1, 12.7$  Hz, 2H), 1.98 (t,  $J = 12.2$  Hz, 1H), 1.65 (d,  $J = 13.2$  Hz, 2H), 1.50 (d,  $J = 12.9$  Hz, 1H), 1.40 (d,  $J = 12.8$  Hz, 2H), 1.33-1.21 (m, 1H), 0.92 (q,  $J = 13.3$  Hz, 2H), 0.35 (s, 9H).  $^{13}\text{C NMR}$  (125 MHz,  $\text{CDCl}_3$ )  $\delta$  177.4, 151.4, 141.8, 140.8, 136.3, 133.8, 131.7, 127.3, 126.9, 126.6, 126.0, 123.0, 115.3, 41.6, 37.4, 29.2, 27.1, 25.8, -1.1. **HRMS** (EI-ESA)  $m/z$ :  $[\text{M}]^+$  Calcd for  $\text{C}_{25}\text{H}_{31}\text{NOSi}$  389.2169; Found 389.2152.

**1-methyl-2-(4-(trimethylsilyl)phenyl)quinolin-4(1H)-one (3ag):** Purification by flash column

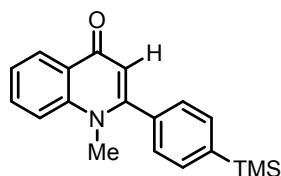

chromatography on silica gel (Hexane/EtOAc = 1:1) afforded **3ag** as a red solid. 84% yield (25.8 mg). m.p. 145-147 °C.  $^1\text{H NMR}$  (500 MHz,  $\text{CDCl}_3$ )  $\delta$  8.51 (dd,  $J = 8.1, 1.7$  Hz, 1H), 7.77-7.71 (m, 1H), 7.68-7.63

(m, 2H), 7.59 (d,  $J = 8.6$  Hz, 1H), 7.48-7.43 (m, 1H), 7.42-7.38 (m, 2H), 6.39 (s, 1H), 3.65 (s, 3H), 0.33 (s, 9H).  $^{13}\text{C}$  NMR (125 MHz,  $\text{CDCl}_3$ )  $\delta$  177.4, 155.3, 143.0, 142.0, 136.1, 133.8, 132.6, 127.9, 126.9, 126.7, 124.0, 116.2, 112.6, 37.6, -1.1. HRMS (ESI-ESA)  $m/z$ :  $[\text{M}]^+$  Calcd for  $\text{C}_{19}\text{H}_{22}\text{NOSi}$  308.1465; Found 308.1468.

**Ethyl 1-methyl-4-oxo-2-(4-(trimethylsilyl)phenyl)-1,4-dihydroquinoline-3-carboxylate (3ah):**

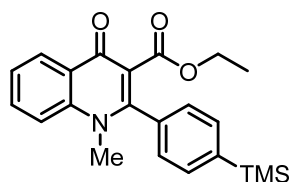

Purification by flash column chromatography on silica gel (Hexane/EtOAc = 1:1) afforded **3ah** as a red liquid. 68% yield (25.8 mg).  $^1\text{H}$  NMR (500 MHz,  $\text{CDCl}_3$ )  $\delta$  7.65-7.60 (m, 2H), 7.56-7.53 (m, 2H), 7.26-7.22 (m, 1H), 6.92-6.89 (m, 1H), 6.81-6.75 (m, 2H), 4.40 (q,  $J = 7.1$  Hz, 2H), 3.24 (s, 3H), 1.37 (t,  $J = 7.2$  Hz, 3H), 0.32 (s, 9H).

$^{13}\text{C}$  NMR (125 MHz,  $\text{CDCl}_3$ )  $\delta$  168.3, 166.5, 144.6, 143.1, 141.8, 134.1, 134.0, 130.5, 127.2, 125.4, 123.6, 122.0, 120.8, 108.3, 62.2, 26.1, 14.1, -1.0. HRMS (ESI)  $m/z$ :  $[\text{M}+\text{H}]^+$  Calcd for  $\text{C}_{22}\text{H}_{26}\text{NO}_3\text{Si}$  380.1676; Found 380.1675.

**1-ethyl-3-methyl-2-(4-(trimethylsilyl)phenyl)quinolin-4(1H)-one (3ai):**

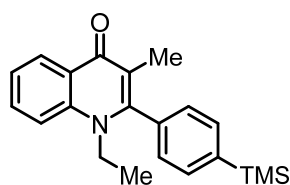

Purification by flash column chromatography on silica gel (Hexane/EtOAc = 1:1) afforded **3ai** as an orange liquid. 89% yield (29.8 mg).  $^1\text{H}$  NMR (500 MHz,  $\text{CDCl}_3$ )  $\delta$  8.57 (dd,  $J = 8.2, 1.7$  Hz, 1H), 7.69-7.63 (m, 3H), 7.52 (d,  $J = 8.7$  Hz, 1H), 7.40-7.35 (m, 1H), 7.28-7.24 (m, 2H), 4.00 (q,  $J = 7.1$  Hz, 2H), 1.80 (s, 3H), 1.24 (t,  $J = 7.1$  Hz, 3H), 0.34 (s, 9H).  $^{13}\text{C}$  NMR

(125 MHz,  $\text{CDCl}_3$ )  $\delta$  177.3, 151.0, 141.9, 139.6, 135.8, 134.1, 131.8, 127.4, 127.3, 125.6, 123.0, 118.3, 115.8, 43.5, 14.4, 13.5, -1.0. HRMS (EI-ESA)  $m/z$ :  $[\text{M}]^+$  Calcd for  $\text{C}_{21}\text{H}_{25}\text{NOSi}$  335.1700; Found 335.1683.

**3-methyl-1-phenyl-2-(4-(trimethylsilyl)phenyl)quinolin-4(1H)-one (3aj):**

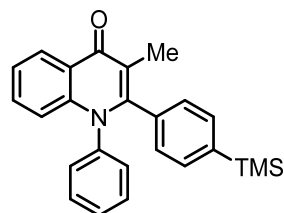

Purification by flash column chromatography on silica gel (Hexane/EtOAc = 1:1) afforded **3aj** as an orange solid. 86% yield (32.9 mg). m.p. 194-196 °C.  $^1\text{H}$  NMR (500 MHz,  $\text{CDCl}_3$ )  $\delta$  8.58-8.52 (m, 1H), 7.44-7.37 (m, 1H), 7.35-7.23 (m, 6H), 7.11-7.05 (m, 2H), 7.02 (d,  $J = 7.7$  Hz, 2H), 6.75 (d,  $J = 8.6$  Hz, 1H), 1.94 (s, 3H), 0.20 (s, 9H).  $^{13}\text{C}$  NMR (125 MHz,  $\text{CDCl}_3$ )  $\delta$  178.1, 150.8, 142.0, 140.8, 139.9, 135.4, 132.9, 131.4, 130.3,

129.4, 128.7, 128.6, 126.5, 124.6, 123.3, 118.2, 117.9, 13.3, -1.2. HRMS (ESI-ESA)  $m/z$ :  $[\text{M}]^+$  Calcd for  $\text{C}_{25}\text{H}_{26}\text{NOSi}$  384.1778; Found 384.1777.

**N-(2-benzoylphenyl)-N-methylbenzamide (4)<sup>9</sup>:**

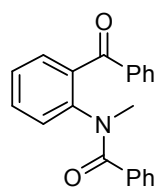

Purification by flash column chromatography on silica gel (Hexane/EtOAc = 1:1) afforded **4** as a yellow oil. 86% yield (27.1 mg).  $^1\text{H}$  NMR (500 MHz,  $\text{CDCl}_3$ )  $\delta$  7.53-7.45 (m, 2H), 7.35-7.14 (m, 10H), 7.01-6.98 (m, 2H), 3.43 (s, 3H).  $^{13}\text{C}$  NMR (125 MHz,  $\text{CDCl}_3$ )  $\delta$  194.8, 170.0, 144.5, 136.5, 136.0, 135.5, 133.1, 131.8, 130.5, 130.2, 129.6, 129.5, 129.1, 128.2, 127.7, 126.4, 39.2.

## 5. Supplementary References

1. (a) Zi, Y.; Cai, Z. J.; Wang, S. Y.; Ji, S. J. Synthesis of Isatins by I<sub>2</sub>/TBHP Mediated Oxidation of Indoles. *Org. Lett.* **2014**, *16*, 3094–3097. (b) Samineni, R.; Madapa, J.; Srihari, P.; Mehta, G. Spiroannulation of Oxindoles via Aryne and Alkyne Incorporation: Substituent-Diverted, Transition-Metal-Free, One-Pot Access to Spirooxindoles. *Org. Lett.* **2017**, *19*, 3119–3122. (c) Jia, W. L.; He, J.; Yang, J. J.; Gao, X. W.; Liu, Q.; Wu, L. Z. Homocoupling of 3-Halooxindole via Visible-Light Photocatalysis: A Mild Access to 3,3'-Bioxindoles. *J. Org. Chem.* **2016**, *81*, 7172–7181.
2. Chouhan, M.; Sharma, R.; Nair, V.A. Cp<sub>2</sub>ZrCl<sub>2</sub>-induced Reformatsky and Barbier reactions on isatins: an efficient synthesis of 3-substituted-3-hydroxyindolin-2-ones. *Appl. Organometal. Chem.* **2011**, *25*, 470-475.
3. Shen, Y. Y.; Gu, Y. T.; Martin, R. *sp*<sup>3</sup> C–H Arylation and Alkylation Enabled by the Synergy of Triplet Excited Ketones and Nickel Catalysts. *J. Am. Chem. Soc.* **2018**, *140*, 12200–12209.
4. Gorokhovich, I.; Neuville, L.; Zhu J. Trifluoroacetic Acid-Promoted Synthesis of 3-Hydroxy, 3-Amino and Spirooxindoles from  $\alpha$ -Keto-N-Anilides. *Org. Lett.* **2011**, *13*, 5536–5539.
5. Chen, G.; Lin, J.; Zhang, J.; Wu, Y.; Gu, X. F.; Hao, X. J.; Zhang, Y. Autocatalytic synthesis of 3-ethyl-3-hydroxy-indole-2-ones and their neuroprotection and antitumor activities' evaluation. *Comptes Rendus Chimie*, **2018**, *21*, 471–474.
6. Nishio, T. Synthesis of 3-Hydroperoxyindolin-2-ones and Oxidation of Sulphides to Sulphoxides by 3-Hydroperoxyindolin-2-one. *J. Chem. Soc., Perkin Trans.* **1991**, *1*, 1717-1720.
7. Brown, M. F. Eur. Pat. Appl. 811613, 1997.
8. Rocha, D. H. A.; Pinto, D. C. G. A.; Silva, A. M. S. Synthesis and cyclisation studies of (E)-2-aryl-1-methyl-3-styrylquinolin-4(1H)-ones. *Tetrahedron.* **2015**, *71*, 7717-7721.
9. Dong, Y.-Q.; Shi, X.-N.; Cao, L.-Y.; Baia, J.; Zhuo, C.-X. Molybdenum-catalyzed carbonyl–carbonyl olefination reaction for heterocycle syntheses. *Org. Chem. Front.*, **2023**, *10*, 3544-3552.

## 6. X-Ray Crystallography Data of Compound 3h

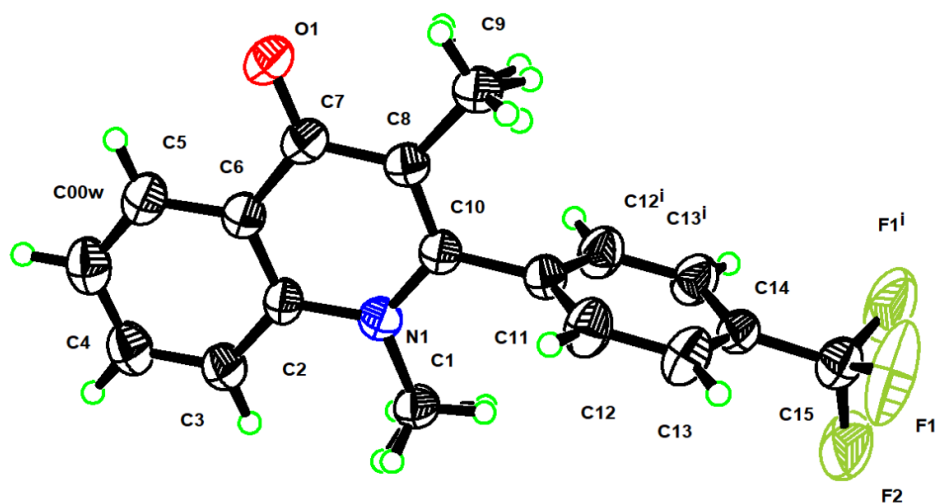

Figure S1. X-ray structures of **3h**

X-ray-quality crystal was obtained by slow evaporation of **3h** solution in hexane and ethyl ether at room temperature under air. Thermal ellipsoids drawn at the 50 % probability level. X-ray diffractions of single crystals was carried out at 100(2) K on a Bruker D8 VENTURE diffractometer using Mo-K $\alpha$  radiation ( $\lambda = 0.71073 \text{ \AA}$ ). Integration and scaling of intensity data was performed using the SAINT program. Data were corrected for the effects of absorption using SADABS. The structures were solved by direct method and refined with full-matrix least-squares technique using SHELX-2014 software. Non-hydrogen atoms were refined with anisotropic displacement parameters, and hydrogen atoms were placed in calculated positions and refined with a riding model.

Table S5 Crystal data and structure refinement for DD.

|                        |                                                                              |
|------------------------|------------------------------------------------------------------------------|
| Identification code    | DD                                                                           |
| Empirical formula      | C <sub>36</sub> H <sub>28</sub> F <sub>6</sub> N <sub>2</sub> O <sub>2</sub> |
| Formula weight         | 634.60                                                                       |
| Temperature/K          | 150.0                                                                        |
| Crystal system         | orthorhombic                                                                 |
| Space group            | Pnma                                                                         |
| a/ $\text{\AA}$        | 25.784(2)                                                                    |
| b/ $\text{\AA}$        | 6.9333(6)                                                                    |
| c/ $\text{\AA}$        | 16.7815(18)                                                                  |
| $\alpha/^\circ$        | 90                                                                           |
| $\beta/^\circ$         | 90                                                                           |
| $\gamma/^\circ$        | 90                                                                           |
| Volume/ $\text{\AA}^3$ | 3000.0(5)                                                                    |
| Z                      | 4                                                                            |

|                                                |                                                               |
|------------------------------------------------|---------------------------------------------------------------|
| $\rho_{\text{calc}}/\text{cm}^3$               | 1.405                                                         |
| $\mu/\text{mm}^{-1}$                           | 0.113                                                         |
| F(000)                                         | 1312.0                                                        |
| Crystal size/ $\text{mm}^3$                    | $0.12 \times 0.08 \times 0.05$                                |
| Radiation                                      | MoK $\alpha$ ( $\lambda = 0.71073$ )                          |
| 2 $\Theta$ range for data collection/ $^\circ$ | 3.984 to 52.766                                               |
| Index ranges                                   | $-26 \leq h \leq 32, -8 \leq k \leq 8, -17 \leq l \leq 20$    |
| Reflections collected                          | 17528                                                         |
| Independent reflections                        | 3262 [ $R_{\text{int}} = 0.0818, R_{\text{sigma}} = 0.0579$ ] |
| Data/restraints/parameters                     | 3262/312/275                                                  |
| Goodness-of-fit on $F^2$                       | 1.017                                                         |
| Final R indexes [ $I \geq 2\sigma(I)$ ]        | $R_1 = 0.0628, wR_2 = 0.1427$                                 |
| Final R indexes [all data]                     | $R_1 = 0.1363, wR_2 = 0.1911$                                 |
| Largest diff. peak/hole / $e \text{ \AA}^{-3}$ | 0.34/-0.31                                                    |

Table S6 Fractional Atomic Coordinates ( $\times 10^4$ ) and Equivalent Isotropic Displacement Parameters ( $\text{\AA}^2 \times 10^3$ ) for DD.  $U_{\text{eq}}$  is defined as 1/3 of the trace of the orthogonalised  $U_{ij}$  tensor.

| Atom  | x          | y       | z          | U(eq)     |
|-------|------------|---------|------------|-----------|
| O(2)  | 2561.0(8)  | 7500    | 8031.4(13) | 41.8(6)   |
| O(1)  | 3849.6(8)  | 2500    | 7579.3(14) | 47.8(6)   |
| N(1)  | 2469.3(10) | 2500    | 6368.7(15) | 39.5(7)   |
| N(2)  | 3929.8(10) | 7500    | 6795.0(15) | 40.1(7)   |
| F(2)  | 88.8(9)    | 2500    | 8109.2(15) | 120.5(12) |
| F(1)  | 354.0(7)   | 3989(3) | 9099.3(12) | 111.4(7)  |
| C(6)  | 3405.4(12) | 2500    | 6344.0(19) | 38.1(8)   |
| C(8)  | 2931.7(12) | 2500    | 7617.8(18) | 37.1(8)   |
| C(2)  | 2928.7(12) | 2500    | 5940.8(19) | 37.5(8)   |
| C(7)  | 3423.8(12) | 2500    | 7215(2)    | 38.4(8)   |
| C(11) | 1962.8(12) | 2500    | 7601.7(18) | 38.2(8)   |
| C(21) | 2532.0(12) | 7500    | 6337.8(19) | 38.4(8)   |
| C(17) | 3468.4(12) | 7500    | 6367.5(19) | 35.0(7)   |
| C(23) | 3472.8(12) | 7500    | 8052.4(19) | 37.9(8)   |
| C(10) | 2477.2(12) | 2500    | 7190.3(19) | 36.2(7)   |
| C(22) | 2979.3(12) | 7500    | 7650.5(18) | 35.4(7)   |
| C(16) | 2993.7(12) | 7500    | 6784.3(18) | 36.1(7)   |

|        |            |         |            |          |
|--------|------------|---------|------------|----------|
| C(18)  | 3468.4(13) | 7500    | 5532.5(19) | 42.0(8)  |
| C(25)  | 3922.6(12) | 7500    | 7617.8(19) | 38.4(8)  |
| C(27)  | 4432.5(12) | 7500    | 8034.8(19) | 39.8(8)  |
| C(14)  | 981.5(12)  | 2500    | 8298.0(19) | 40.6(8)  |
| C(19)  | 3009.2(13) | 7500    | 5123(2)    | 46.0(9)  |
| C(15)  | 456.5(13)  | 2500    | 8642(2)    | 49.2(9)  |
| C(3)   | 2926.7(14) | 2500    | 5104.5(19) | 44.5(9)  |
| C(1)   | 1981.0(12) | 2500    | 5927.3(19) | 45.7(9)  |
| C(9)   | 2923.4(13) | 2500    | 8515(2)    | 47.1(9)  |
| C(20)  | 2538.3(13) | 7500    | 5522.2(19) | 43.6(8)  |
| C(12)  | 1719.5(9)  | 4213(3) | 7791.1(15) | 50.3(7)  |
| C(13)  | 1228.8(9)  | 4206(3) | 8134.4(16) | 51.4(7)  |
| C(24)  | 3475.3(13) | 7500    | 8946.5(19) | 48.4(9)  |
| C(5)   | 3869.1(13) | 2500    | 5901(2)    | 46.3(9)  |
| C(00W) | 3859.3(15) | 2500    | 5084(2)    | 53.0(10) |
| C(4)   | 3385.4(14) | 2500    | 4694(2)    | 52.6(10) |
| C(28)  | 4664.7(9)  | 9213(4) | 8251.3(16) | 58.1(7)  |
| C(30)  | 5357.4(14) | 7500    | 8889(2)    | 52.1(10) |
| C(26)  | 4419.6(13) | 7500    | 6346(2)    | 52.4(10) |
| C(29)  | 5122.1(10) | 9216(4) | 8676.1(17) | 62.7(8)  |
| C(31)  | 5851.9(16) | 7500    | 9337(3)    | 73.2(12) |
| F(5)   | 6233.7(13) | 8284(7) | 8943(3)    | 151(2)   |
| F(3)   | 6023.0(14) | 5764(6) | 9525(3)    | 99.8(13) |
| F(4)   | 5818.5(16) | 8338(7) | 10017(2)   | 161(2)   |

Table S7 Anisotropic Displacement Parameters ( $\text{\AA}^2 \times 10^3$ ) for DD. The Anisotropic displacement factor exponent takes the form:  $-2\pi^2[h^2a^*^2U_{11}+2hka^*b^*U_{12}+\dots]$ .

| Atom | $U_{11}$ | $U_{22}$  | $U_{33}$  | $U_{23}$  | $U_{13}$ | $U_{12}$ |
|------|----------|-----------|-----------|-----------|----------|----------|
| O(2) | 36.9(12) | 46.2(12)  | 42.2(12)  | 0         | 3.9(10)  | 0        |
| O(1) | 32.8(12) | 55.4(13)  | 55.2(14)  | 0         | -3.5(11) | 0        |
| N(1) | 37.3(14) | 46.9(14)  | 34.3(13)  | 0         | -1.1(12) | 0        |
| N(2) | 34.6(14) | 45.3(14)  | 40.5(14)  | 0         | 0.4(12)  | 0        |
| F(2) | 35.3(13) | 259(4)    | 67.0(16)  | 0         | -4.8(12) | 0        |
| F(1) | 62.5(11) | 110.4(13) | 161.5(16) | -65.6(12) | 54.5(10) | -17.5(9) |
| C(6) | 36.7(17) | 35.8(15)  | 41.8(16)  | 0         | 2.3(13)  | 0        |
| C(8) | 37.0(16) | 36.5(15)  | 37.8(16)  | 0         | -1.9(13) | 0        |

|        |          |          |          |           |           |          |
|--------|----------|----------|----------|-----------|-----------|----------|
| C(2)   | 33.9(16) | 38.7(16) | 39.8(16) | 0         | 6.9(13)   | 0        |
| C(7)   | 34.6(16) | 31.5(14) | 48.9(18) | 0         | -2.4(14)  | 0        |
| C(11)  | 36.1(17) | 43.0(16) | 35.4(17) | 0         | 1.4(14)   | 0        |
| C(21)  | 32.7(17) | 38.1(16) | 44.4(17) | 0         | 1.6(14)   | 0        |
| C(17)  | 32.4(15) | 36.3(15) | 36.4(16) | 0         | 0.1(13)   | 0        |
| C(23)  | 36.6(16) | 36.0(15) | 41.0(17) | 0         | -0.7(14)  | 0        |
| C(10)  | 35.6(16) | 35.4(15) | 37.6(16) | 0         | 1.9(13)   | 0        |
| C(22)  | 33.4(16) | 31.8(14) | 41.1(17) | 0         | 3.7(13)   | 0        |
| C(16)  | 38.2(16) | 31.2(14) | 39.0(16) | 0         | -1.1(13)  | 0        |
| C(18)  | 45.4(19) | 44.2(17) | 36.5(17) | 0         | 4.3(14)   | 0        |
| C(25)  | 36.6(17) | 36.1(15) | 42.7(17) | 0         | -3.8(14)  | 0        |
| C(27)  | 33.3(17) | 46.9(17) | 39.3(18) | 0         | 3.6(14)   | 0        |
| C(14)  | 31.4(16) | 52.0(17) | 38.4(18) | 0         | -1.1(14)  | 0        |
| C(19)  | 47.7(19) | 54.0(19) | 36.2(18) | 0         | -0.4(15)  | 0        |
| C(15)  | 39.4(19) | 51.1(18) | 57(2)    | 0         | 4.1(16)   | 0        |
| C(3)   | 44.7(19) | 49.8(18) | 39.1(17) | 0         | 2.5(15)   | 0        |
| C(1)   | 36.7(18) | 62(2)    | 38.2(18) | 0         | -4.9(15)  | 0        |
| C(9)   | 42.3(19) | 59(2)    | 39.8(17) | 0         | -4.6(16)  | 0        |
| C(20)  | 43.5(18) | 44.6(18) | 42.6(18) | 0         | -6.2(15)  | 0        |
| C(12)  | 44.0(14) | 40.8(12) | 66.1(16) | -4.6(12)  | 9.8(12)   | -5.6(10) |
| C(13)  | 39.0(13) | 45.4(12) | 69.7(17) | -10.8(12) | 6.2(12)   | 1.2(11)  |
| C(24)  | 40(2)    | 64(2)    | 41.1(18) | 0         | -3.0(16)  | 0        |
| C(5)   | 37.5(18) | 42.2(17) | 59(2)    | 0         | 6.5(16)   | 0        |
| C(00W) | 54(2)    | 49.8(19) | 55(2)    | 0         | 16.5(17)  | 0        |
| C(4)   | 59(2)    | 55(2)    | 43(2)    | 0         | 11.2(16)  | 0        |
| C(28)  | 46.0(14) | 45.7(13) | 82.6(19) | 2.1(13)   | -18.0(13) | -1.5(11) |
| C(30)  | 41.8(19) | 57(2)    | 57(2)    | 0         | -9.5(17)  | 0        |
| C(26)  | 35.6(18) | 71(2)    | 51(2)    | 0         | 1.9(16)   | 0        |
| C(29)  | 48.0(15) | 51.8(14) | 88(2)    | -4.5(14)  | -17.4(14) | -4.6(12) |
| C(31)  | 53(2)    | 82(3)    | 85(3)    | 0         | -22(2)    | 0        |
| F(5)   | 46.1(19) | 221(6)   | 186(4)   | 91(3)     | -28(2)    | -37(2)   |
| F(3)   | 67(2)    | 96(2)    | 136(3)   | 4(2)      | -54(2)    | 22.7(19) |
| F(4)   | 114(3)   | 229(6)   | 139(3)   | -104(3)   | -78(2)    | 72(3)    |

Table S8 Bond Lengths for DD.

| Atom  | Atom               | Length/Å | Atom   | Atom               | Length/Å |
|-------|--------------------|----------|--------|--------------------|----------|
| O(2)  | C(22)              | 1.254(4) | C(23)  | C(22)              | 1.440(4) |
| O(1)  | C(7)               | 1.256(4) | C(23)  | C(25)              | 1.370(4) |
| N(1)  | C(2)               | 1.385(4) | C(23)  | C(24)              | 1.500(4) |
| N(1)  | C(10)              | 1.379(4) | C(22)  | C(16)              | 1.454(4) |
| N(1)  | C(1)               | 1.461(4) | C(18)  | C(19)              | 1.369(5) |
| N(2)  | C(17)              | 1.389(4) | C(25)  | C(27)              | 1.489(4) |
| N(2)  | C(25)              | 1.381(4) | C(27)  | C(28)              | 1.379(3) |
| N(2)  | C(26)              | 1.471(4) | C(27)  | C(28) <sup>2</sup> | 1.379(3) |
| F(2)  | C(15)              | 1.303(4) | C(14)  | C(15)              | 1.472(5) |
| F(1)  | C(15)              | 1.313(3) | C(14)  | C(13) <sup>1</sup> | 1.372(3) |
| C(6)  | C(2)               | 1.403(4) | C(14)  | C(13)              | 1.372(3) |
| C(6)  | C(7)               | 1.463(4) | C(19)  | C(20)              | 1.386(5) |
| C(6)  | C(5)               | 1.408(4) | C(3)   | C(4)               | 1.368(5) |
| C(8)  | C(7)               | 1.437(4) | C(12)  | C(13)              | 1.390(3) |
| C(8)  | C(10)              | 1.374(4) | C(5)   | C(00W)             | 1.370(5) |
| C(8)  | C(9)               | 1.506(4) | C(00W) | C(4)               | 1.386(5) |
| C(2)  | C(3)               | 1.403(4) | C(28)  | C(29)              | 1.378(3) |
| C(11) | C(10)              | 1.495(4) | C(30)  | C(29)              | 1.383(3) |
| C(11) | C(12) <sup>1</sup> | 1.380(3) | C(30)  | C(29) <sup>2</sup> | 1.383(3) |
| C(11) | C(12)              | 1.380(3) | C(30)  | C(31)              | 1.480(5) |
| C(21) | C(16)              | 1.407(4) | C(31)  | F(5)               | 1.305(5) |
| C(21) | C(20)              | 1.369(4) | C(31)  | F(3)               | 1.320(4) |
| C(17) | C(16)              | 1.410(4) | C(31)  | F(4)               | 1.283(5) |
| C(17) | C(18)              | 1.401(4) |        |                    |          |

Table S9 Bond Angles for DD.

| Atom  | Atom | Atom  | Angle/°  | Atom               | Atom  | Atom  | Angle/°    |
|-------|------|-------|----------|--------------------|-------|-------|------------|
| C(2)  | N(1) | C(1)  | 118.3(3) | C(17)              | C(16) | C(22) | 121.2(3)   |
| C(10) | N(1) | C(2)  | 120.4(3) | C(19)              | C(18) | C(17) | 120.1(3)   |
| C(10) | N(1) | C(1)  | 121.3(3) | N(2)               | C(25) | C(27) | 117.3(3)   |
| C(17) | N(2) | C(26) | 118.1(3) | C(23)              | C(25) | N(2)  | 122.9(3)   |
| C(25) | N(2) | C(17) | 120.3(3) | C(23)              | C(25) | C(27) | 119.8(3)   |
| C(25) | N(2) | C(26) | 121.6(3) | C(28)              | C(27) | C(25) | 120.47(15) |
| C(2)  | C(6) | C(7)  | 120.7(3) | C(28) <sup>2</sup> | C(27) | C(25) | 120.47(15) |



|                    |       |                    |            |                    |        |                    |            |
|--------------------|-------|--------------------|------------|--------------------|--------|--------------------|------------|
| C(2)               | C(6)  | C(5)               | 119.3(3)   | C(28)              | C(27)  | C(28) <sup>2</sup> | 118.9(3)   |
| C(5)               | C(6)  | C(7)               | 120.0(3)   | C(13)              | C(14)  | C(15)              | 120.41(15) |
| C(7)               | C(8)  | C(9)               | 118.8(3)   | C(13) <sup>1</sup> | C(14)  | C(15)              | 120.41(15) |
| C(10)              | C(8)  | C(7)               | 120.5(3)   | C(13) <sup>1</sup> | C(14)  | C(13)              | 119.2(3)   |
| C(10)              | C(8)  | C(9)               | 120.7(3)   | C(18)              | C(19)  | C(20)              | 121.0(3)   |
| N(1)               | C(2)  | C(6)               | 119.9(3)   | F(2)               | C(15)  | F(1)               | 104.7(2)   |
| N(1)               | C(2)  | C(3)               | 121.0(3)   | F(2)               | C(15)  | F(1) <sup>1</sup>  | 104.7(2)   |
| C(6)               | C(2)  | C(3)               | 119.0(3)   | F(2)               | C(15)  | C(14)              | 113.6(3)   |
| O(1)               | C(7)  | C(6)               | 120.9(3)   | F(1)               | C(15)  | F(1) <sup>1</sup>  | 103.7(3)   |
| O(1)               | C(7)  | C(8)               | 122.9(3)   | F(1)               | C(15)  | C(14)              | 114.5(2)   |
| C(8)               | C(7)  | C(6)               | 116.2(3)   | F(1) <sup>1</sup>  | C(15)  | C(14)              | 114.5(2)   |
| C(12)              | C(11) | C(10)              | 120.62(15) | C(4)               | C(3)   | C(2)               | 120.0(3)   |
| C(12) <sup>1</sup> | C(11) | C(10)              | 120.63(15) | C(21)              | C(20)  | C(19)              | 119.5(3)   |
| C(12)              | C(11) | C(12) <sup>1</sup> | 118.7(3)   | C(11)              | C(12)  | C(13)              | 120.4(2)   |
| C(20)              | C(21) | C(16)              | 121.5(3)   | C(14)              | C(13)  | C(12)              | 120.6(2)   |
| N(2)               | C(17) | C(16)              | 119.2(3)   | C(00W)             | C(5)   | C(6)               | 120.9(3)   |
| N(2)               | C(17) | C(18)              | 121.1(3)   | C(5)               | C(00W) | C(4)               | 119.2(3)   |
| C(18)              | C(17) | C(16)              | 119.7(3)   | C(3)               | C(4)   | C(00W)             | 121.6(3)   |
| C(22)              | C(23) | C(24)              | 118.2(3)   | C(29)              | C(28)  | C(27)              | 120.6(2)   |
| C(25)              | C(23) | C(22)              | 119.9(3)   | C(29)              | C(30)  | C(29) <sup>2</sup> | 118.7(3)   |
| C(25)              | C(23) | C(24)              | 121.9(3)   | C(29)              | C(30)  | C(31)              | 120.63(17) |
| N(1)               | C(10) | C(11)              | 116.7(3)   | C(29) <sup>2</sup> | C(30)  | C(31)              | 120.63(16) |
| C(8)               | C(10) | N(1)               | 122.3(3)   | C(28)              | C(29)  | C(30)              | 120.5(3)   |
| C(8)               | C(10) | C(11)              | 121.0(3)   | F(5)               | C(31)  | C(30)              | 113.1(4)   |
| O(2)               | C(22) | C(23)              | 121.4(3)   | F(5)               | C(31)  | F(3)               | 104.4(4)   |
| O(2)               | C(22) | C(16)              | 122.1(3)   | F(3)               | C(31)  | C(30)              | 114.2(2)   |
| C(23)              | C(22) | C(16)              | 116.5(3)   | F(4)               | C(31)  | C(30)              | 113.2(4)   |
| C(21)              | C(16) | C(17)              | 118.1(3)   | F(4)               | C(31)  | F(5)               | 108.2(4)   |
| C(21)              | C(16) | C(22)              | 120.7(3)   | F(4)               | C(31)  | F(3)               | 102.9(4)   |

Table S10 Hydrogen Atom Coordinates ( $\text{\AA} \times 10^4$ ) and Isotropic Displacement Parameters ( $\text{\AA}^2 \times 10^3$ ) for DD.

| Atom  | <i>x</i> | <i>y</i> | <i>z</i> | U(eq) |
|-------|----------|----------|----------|-------|
| H(21) | 2208.35  | 7500     | 6608.46  | 46    |
| H(18) | 3787.68  | 7500     | 5249.84  | 50    |
| H(19) | 3013.14  | 7500     | 4557.4   | 55    |

|        |         |          |         |    |
|--------|---------|----------|---------|----|
| H(3)   | 2607.01 | 2500     | 4823.25 | 53 |
| H(1A)  | 1690.97 | 2367.87  | 6300.83 | 55 |
| H(1B)  | 1977.76 | 1417.66  | 5551.74 | 55 |
| H(1C)  | 1946.56 | 3714.47  | 5633.24 | 55 |
| H(9A)  | 2701.44 | 1448.62  | 8705.07 | 71 |
| H(9B)  | 2786.88 | 3734.83  | 8706.94 | 71 |
| H(9C)  | 3276.51 | 2316.55  | 8717.63 | 71 |
| H(20)  | 2222.22 | 7500     | 5231.37 | 52 |
| H(12)  | 1888.4  | 5404.13  | 7686.24 | 60 |
| H(13)  | 1063.33 | 5394.04  | 8256.74 | 62 |
| H(24A) | 3468.59 | 8832.36  | 9141.19 | 73 |
| H(24B) | 3789.67 | 6857.01  | 9139.14 | 73 |
| H(24C) | 3169.12 | 6810.63  | 9143.1  | 73 |
| H(5)   | 4192.79 | 2500     | 6170.88 | 56 |
| H(00W) | 4173.69 | 2500     | 4788.93 | 64 |
| H(4)   | 3378.85 | 2500     | 4128.36 | 63 |
| H(28)  | 4507.84 | 10402.16 | 8106.39 | 70 |
| H(26A) | 4454.78 | 8720.64  | 6056.53 | 79 |
| H(26B) | 4419.65 | 6426.58  | 5966.06 | 79 |
| H(26C) | 4710.92 | 7352.78  | 6716.19 | 79 |
| H(29)  | 5277.12 | 10406.81 | 8823.4  | 75 |

Table S11 Atomic Occupancy for DD.

| <i>Atom</i> | <i>Occupancy</i> | <i>Atom</i> | <i>Occupancy</i> | <i>Atom</i> | <i>Occupancy</i> |
|-------------|------------------|-------------|------------------|-------------|------------------|
| H(1A)       | 0.5              | H(1B)       | 0.5              | H(1C)       | 0.5              |
| H(9A)       | 0.5              | H(9B)       | 0.5              | H(9C)       | 0.5              |
| H(24A)      | 0.5              | H(24B)      | 0.5              | H(24C)      | 0.5              |
| H(26A)      | 0.5              | H(26B)      | 0.5              | H(26C)      | 0.5              |
| F(5)        | 0.5              | F(3)        | 0.5              | F(4)        | 0.5              |

## 7. NMR Spectra

### 3-ethyl-3-hydroxy-1-methylindolin-2-one (1a). $^1\text{H}$ NMR (500 MHz, $\text{CDCl}_3$ )

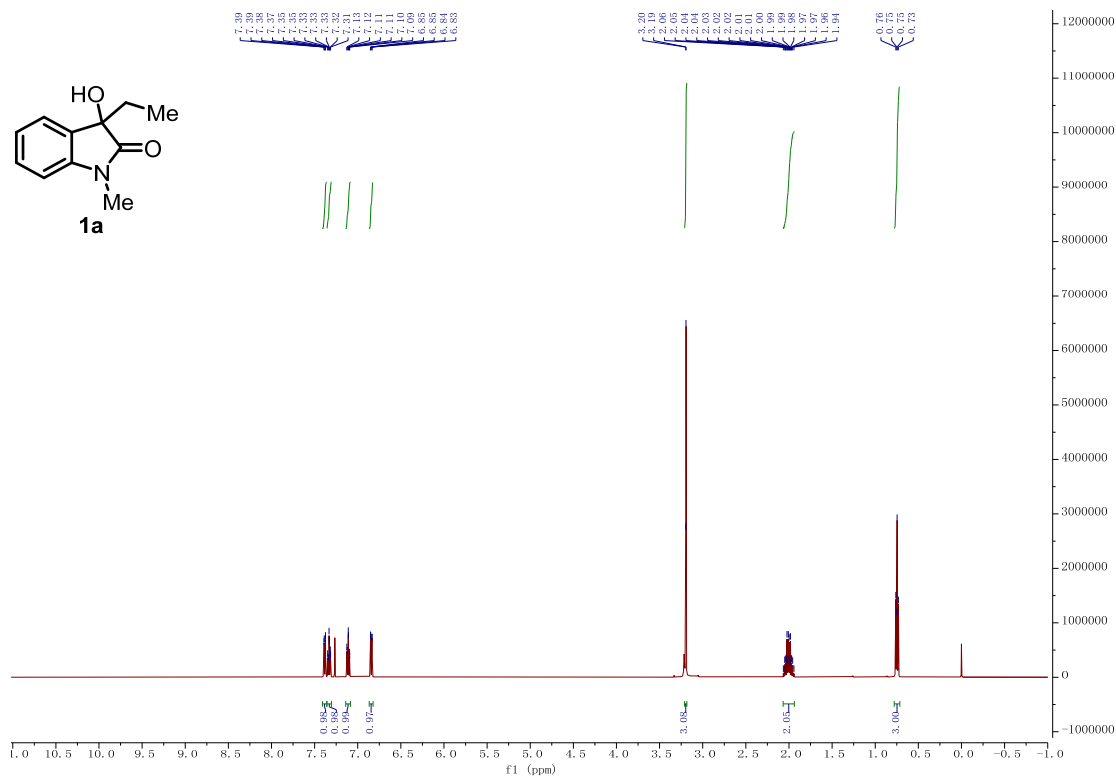

### 3-ethyl-3-hydroxy-1,4-dimethylindolin-2-one (1b). $^1\text{H}$ NMR (500 MHz, $\text{CDCl}_3$ )

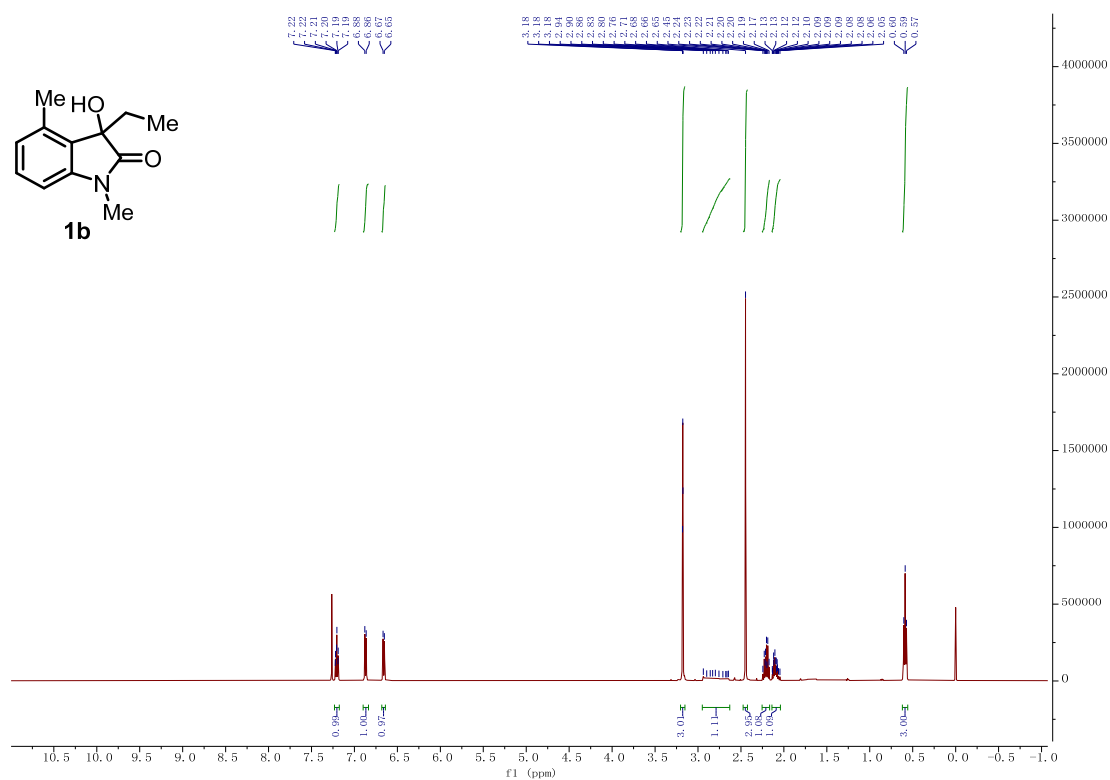

**3-ethyl-3-hydroxy-1,5-dimethylindolin-2-one (1c). <sup>1</sup>H NMR (500 MHz, CDCl<sub>3</sub>)**

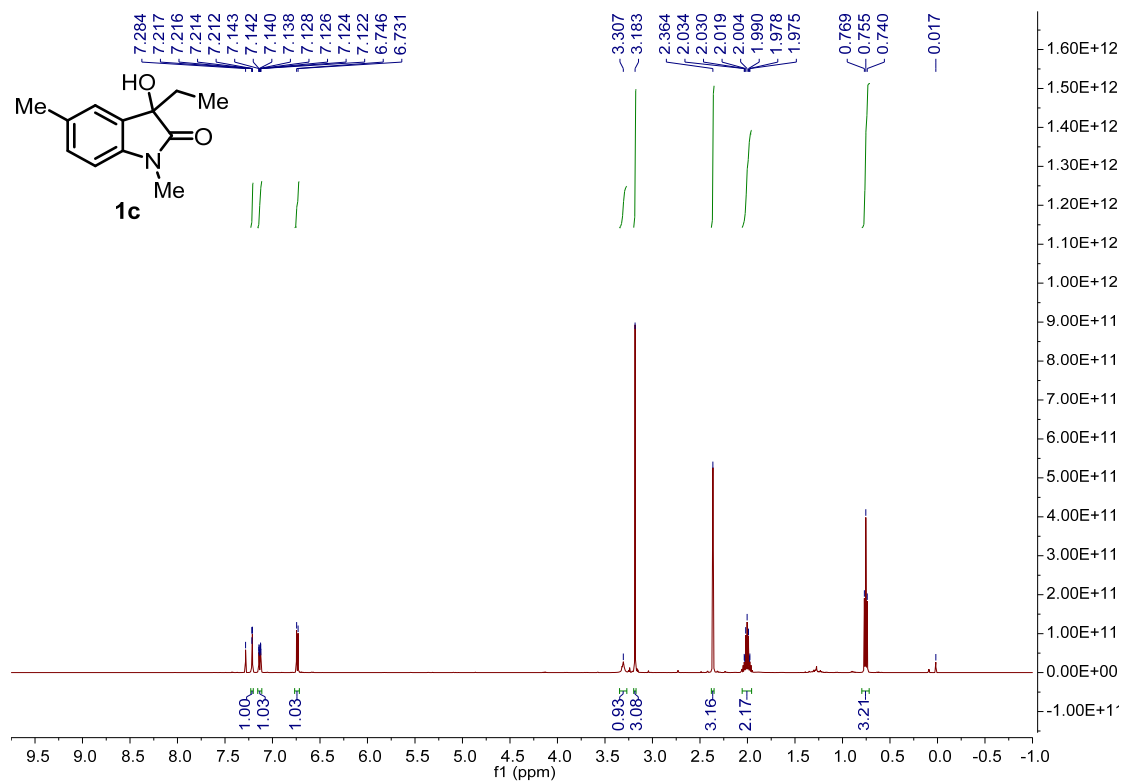

**3-ethyl-3-hydroxy-1,5-dimethylindolin-2-one (1c). <sup>13</sup>C NMR (125 MHz, CDCl<sub>3</sub>)**

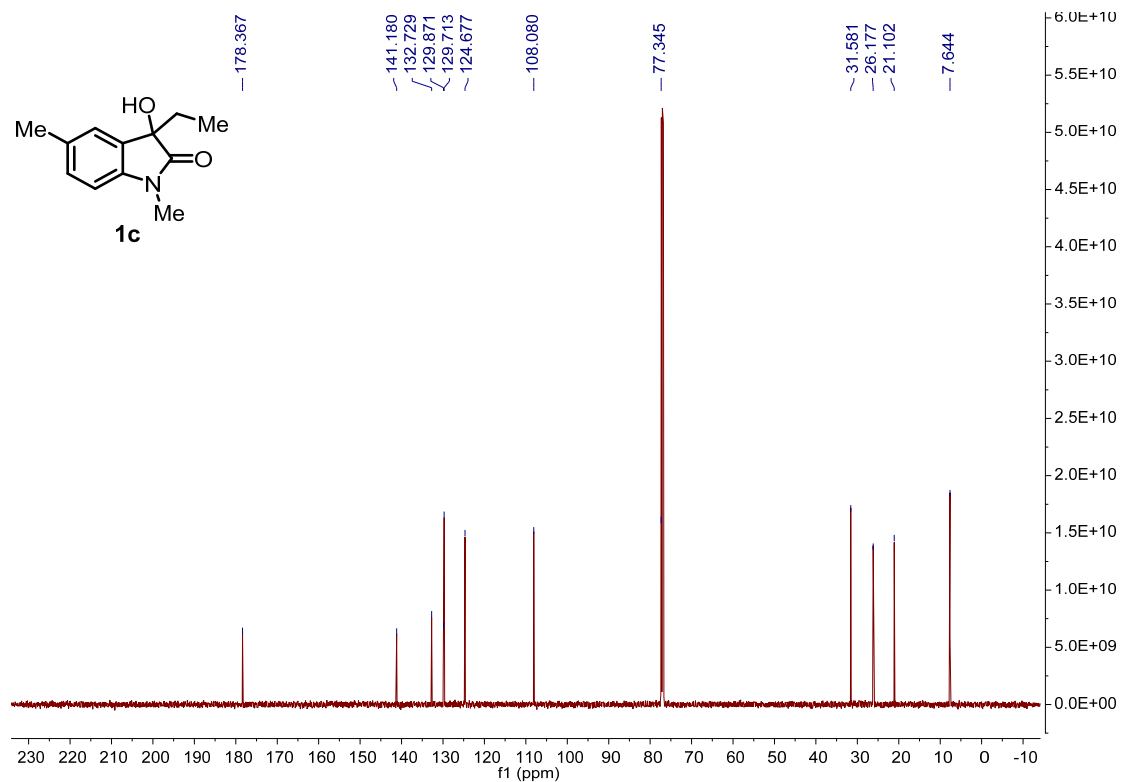

**3-ethyl-5-fluoro-3-hydroxy-1-methylindolin-2-one (1d).  $^1\text{H}$  NMR (500 MHz,  $\text{CDCl}_3$ )**

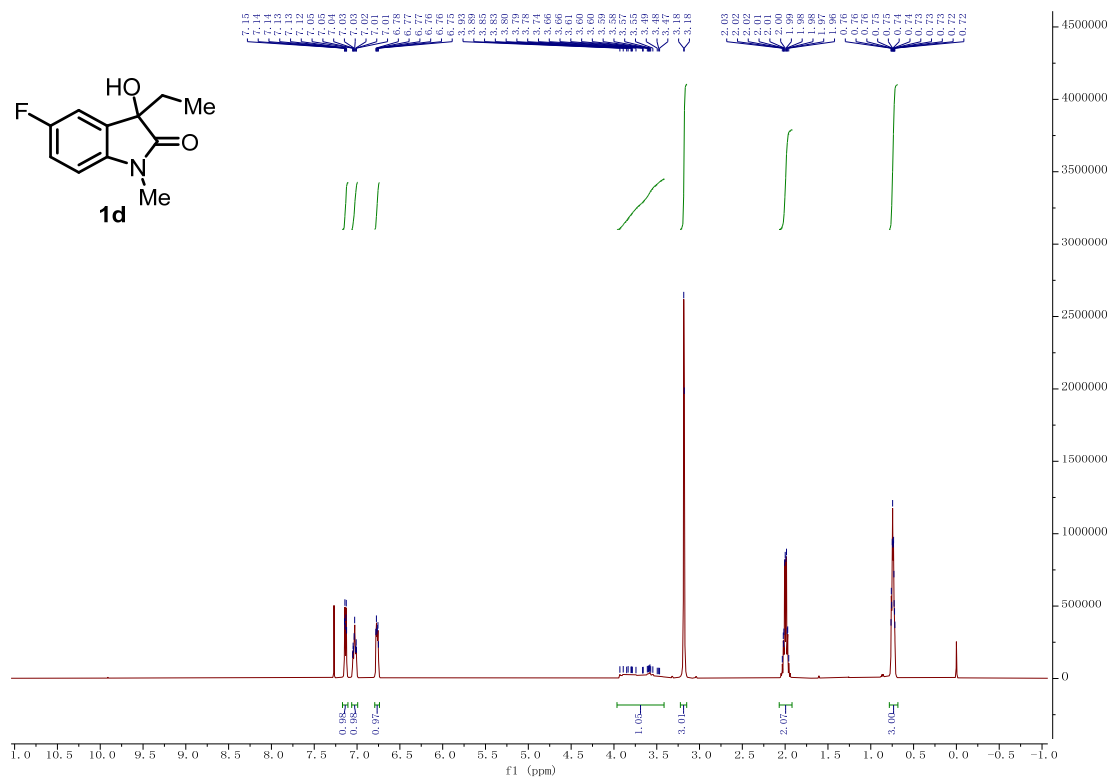

**3-ethyl-5-fluoro-3-hydroxy-1-methylindolin-2-one (1d).  $^{13}\text{C}$  NMR (125 MHz,  $\text{CDCl}_3$ )**

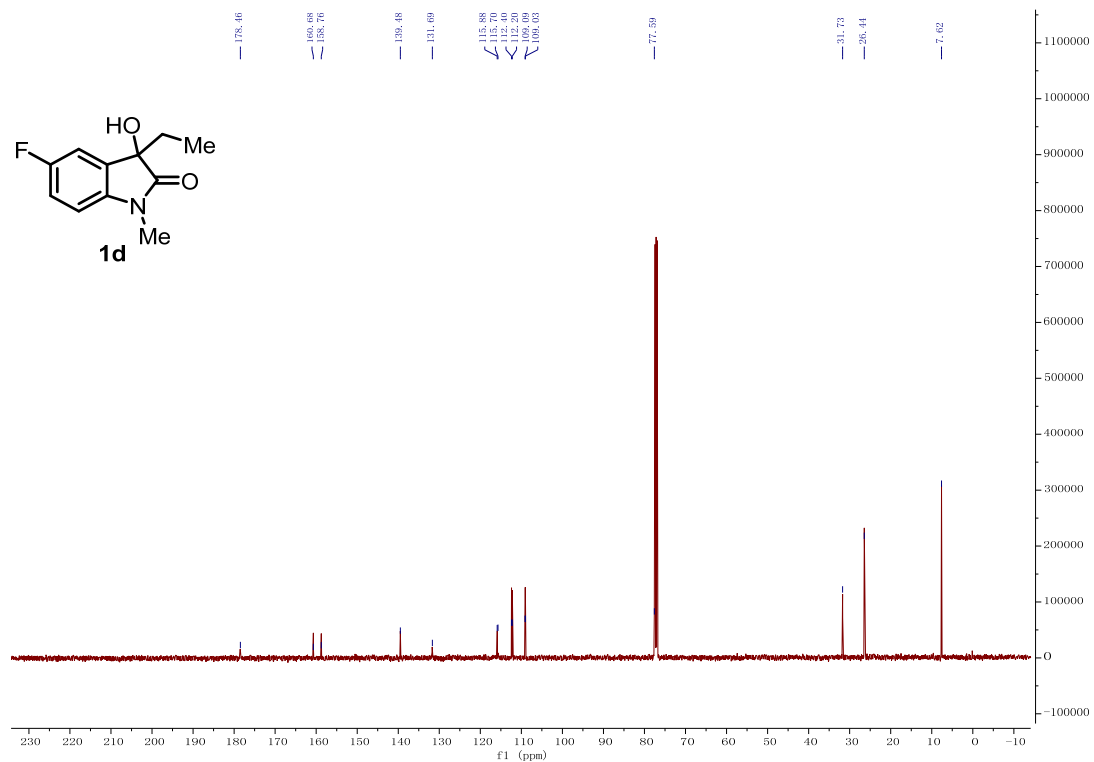

3-ethyl-5-fluoro-3-hydroxy-1-methylindolin-2-one (1d). <sup>19</sup>F NMR (470 MHz, CDCl<sub>3</sub>)

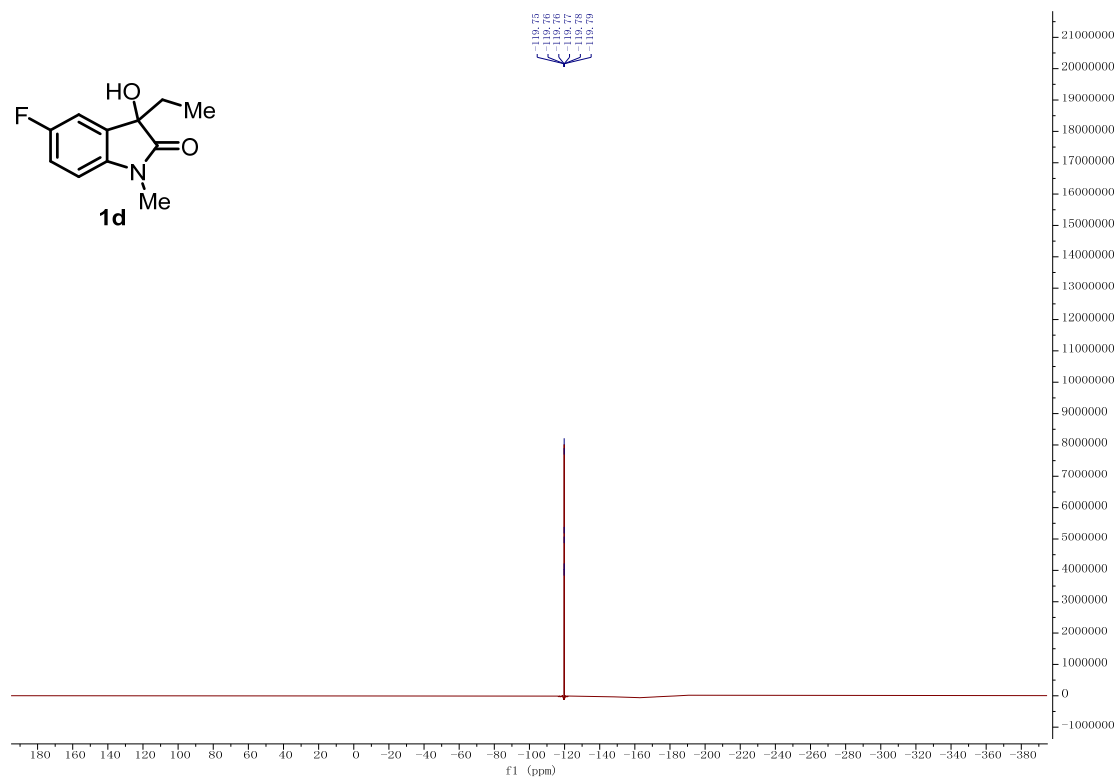

3-ethyl-3-hydroxy-1-methyl-5-(trifluoromethoxy) indolin-2-one (1e). <sup>13</sup>C NMR (500 MHz, CDCl<sub>3</sub>)

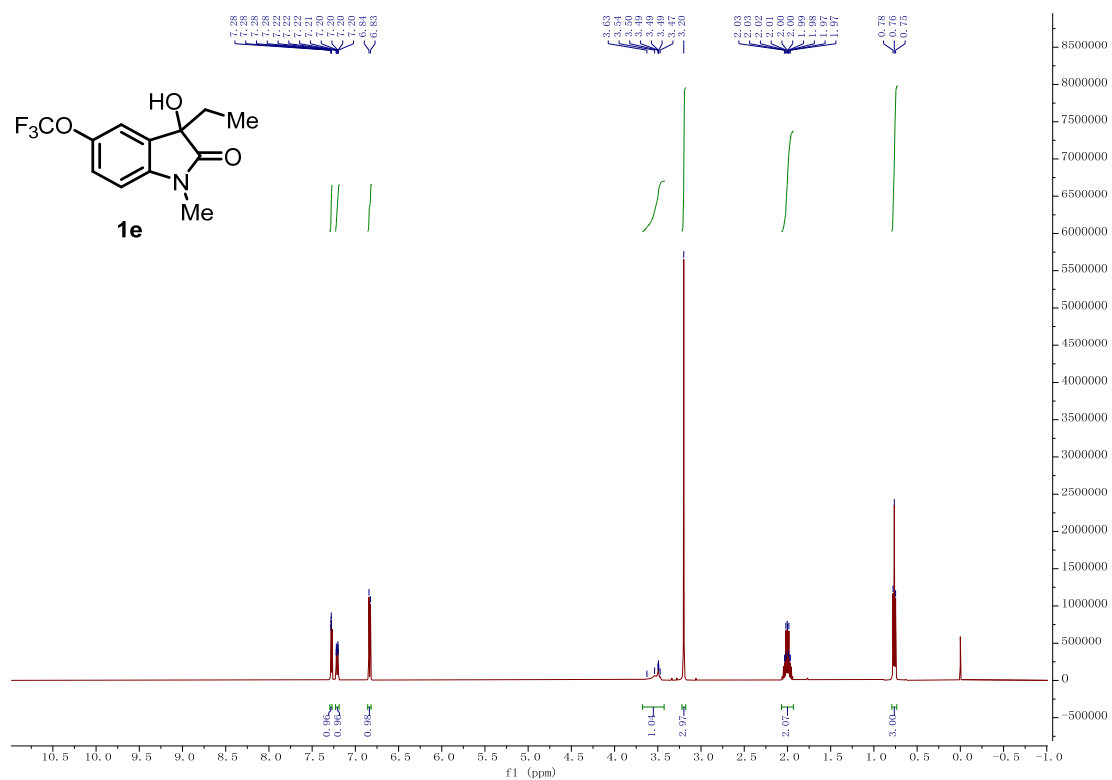

**3-ethyl-3-hydroxy-1-methyl-5-(trifluoromethoxy) indolin-2-one (1e).  $^{13}\text{C}$  NMR (125 MHz, Acetone- $d_6$ )**

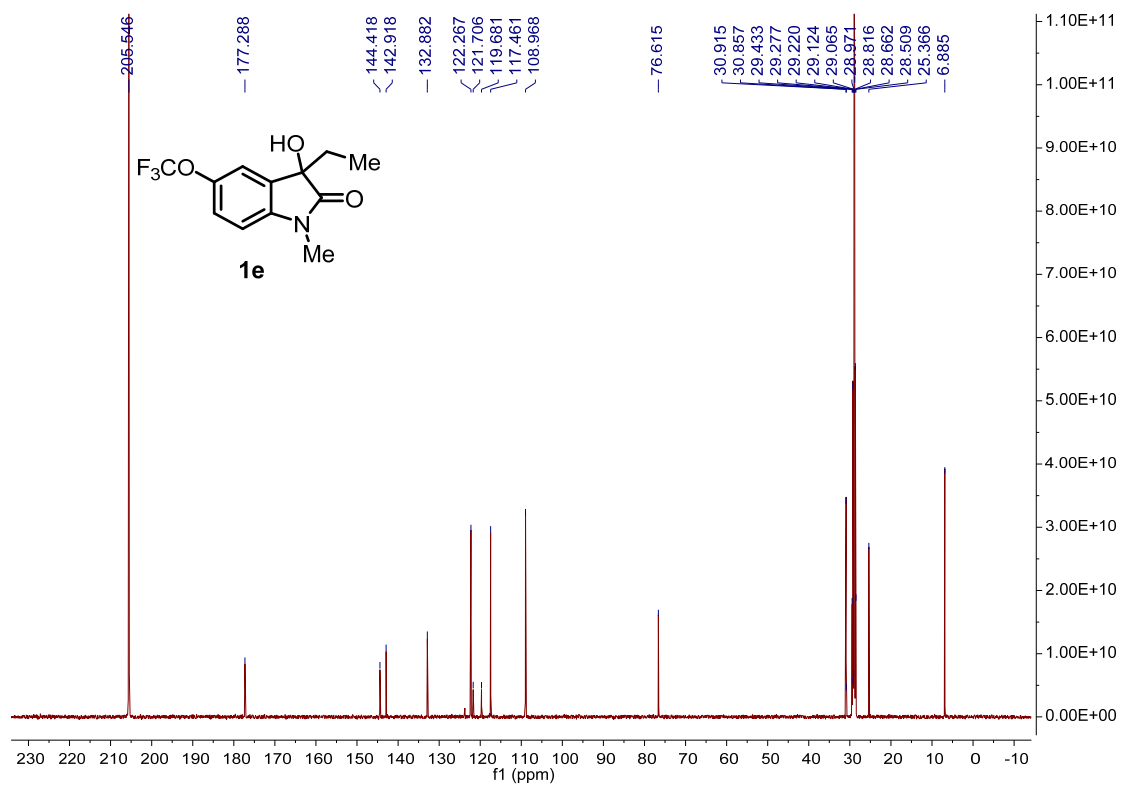

**3-ethyl-3-hydroxy-1-methyl-5-(trifluoromethoxy) indolin-2-one (1e).  $^{19}\text{F}$  NMR (470 MHz,  $\text{CDCl}_3$ )**

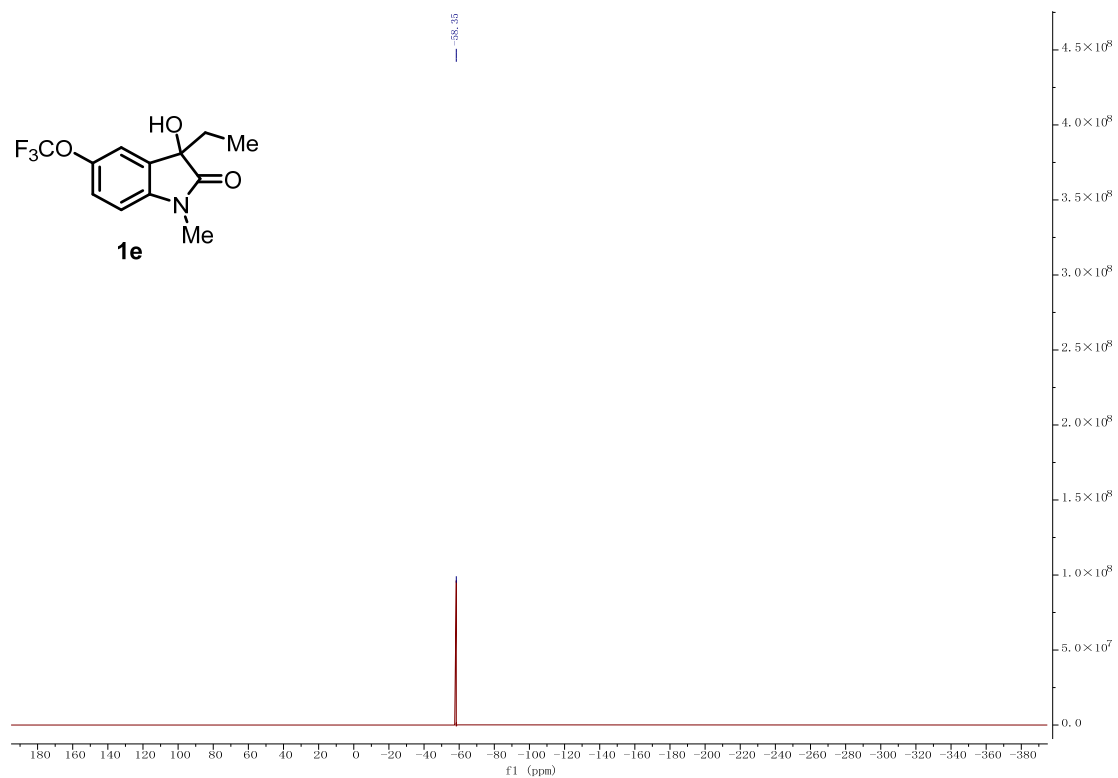

**3-ethyl-3-hydroxy-5-methoxy-1-methylindolin-2-one (1f). <sup>1</sup>H NMR (500 MHz, CDCl<sub>3</sub>)**

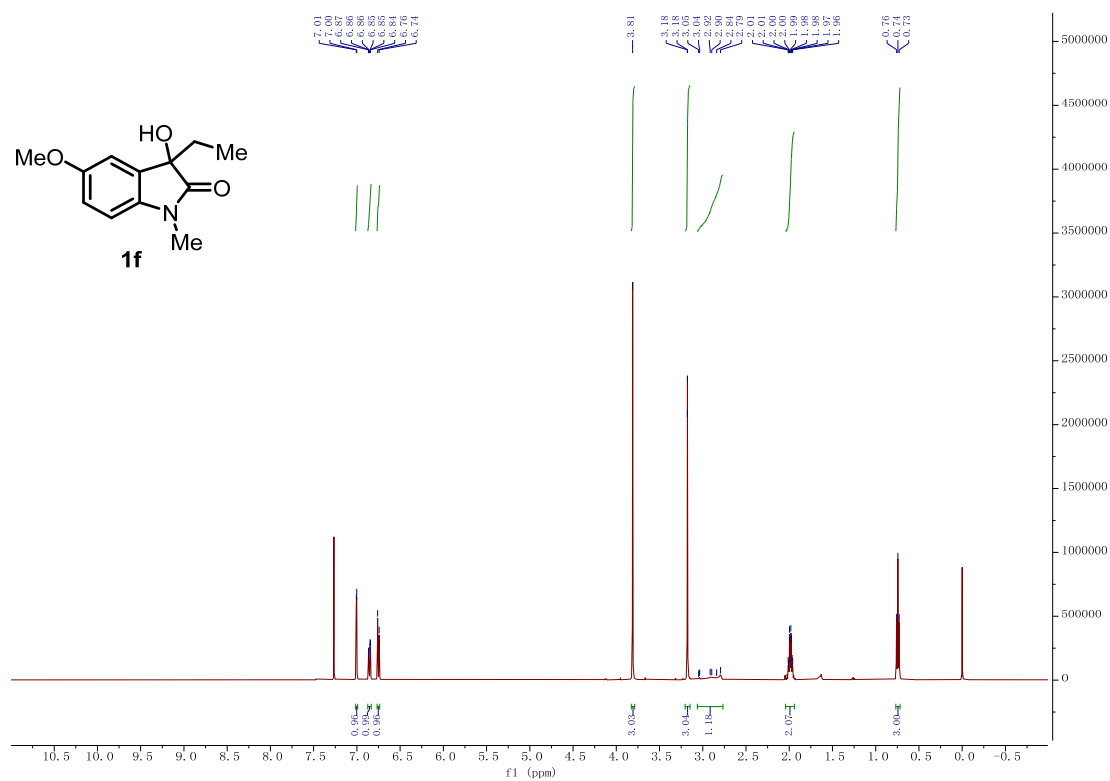

**3-benzyl-3-hydroxy-1-methylindolin-2-one (1g). <sup>1</sup>H NMR (500 MHz, CDCl<sub>3</sub>)**



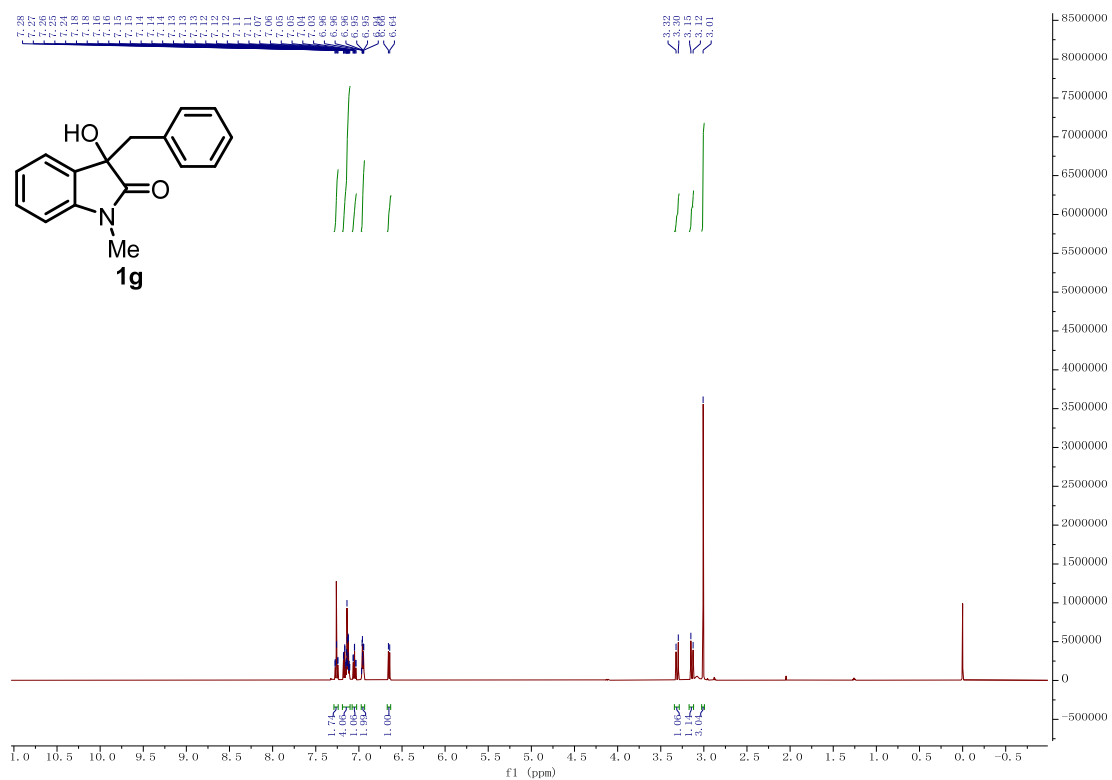

**3-hydroxy-1-methyl-3-(4-methylbenzyl)indolin-2-one (1h).  $^1\text{H}$  NMR (500 MHz,  $\text{CDCl}_3$ )**

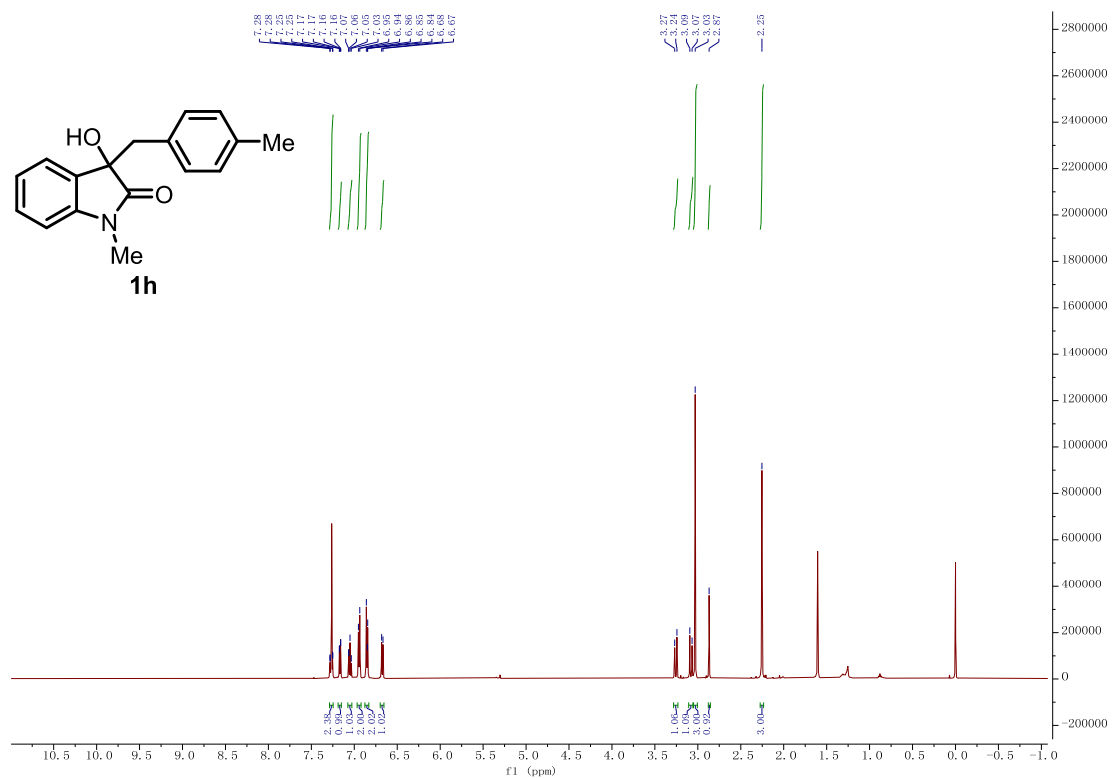

**3-(4-chlorobenzyl)-3-hydroxy-1-methylindolin-2-one (1i).  $^1\text{H}$  NMR (400 MHz,  $\text{CDCl}_3$ )**



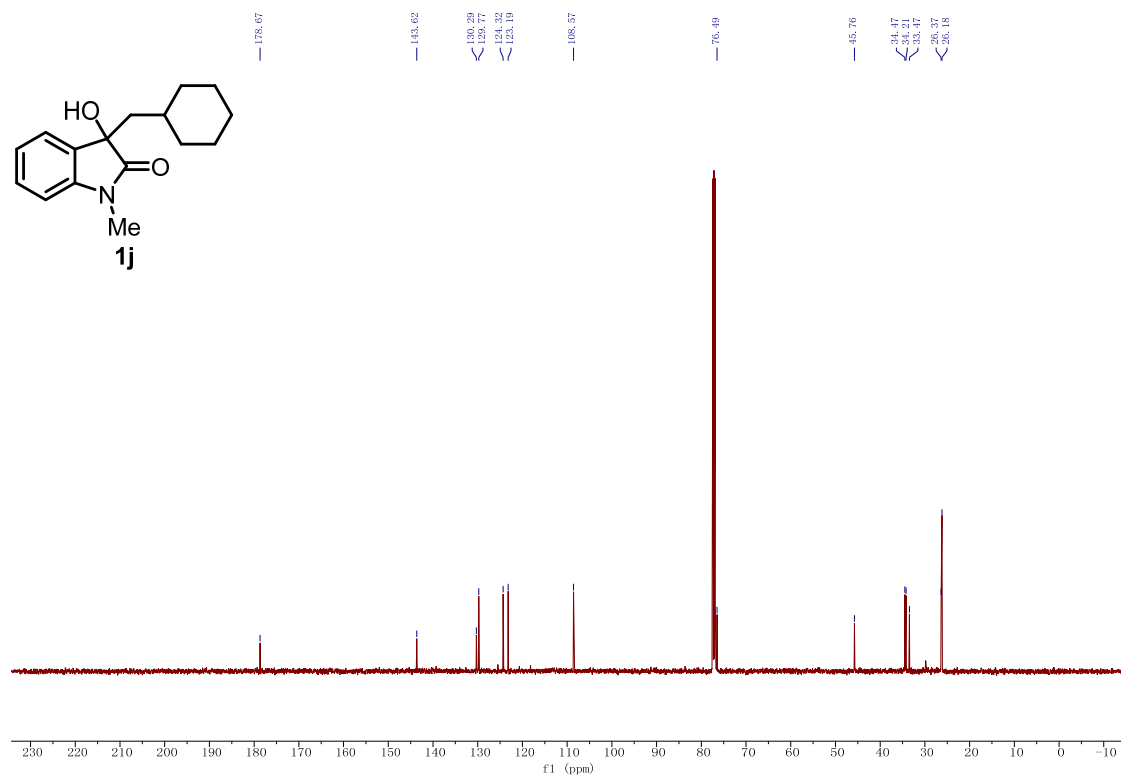

**3-hydroxy-1,3-dimethylindolin-2-one (1k). <sup>1</sup>H NMR (500 MHz, CDCl<sub>3</sub>)**

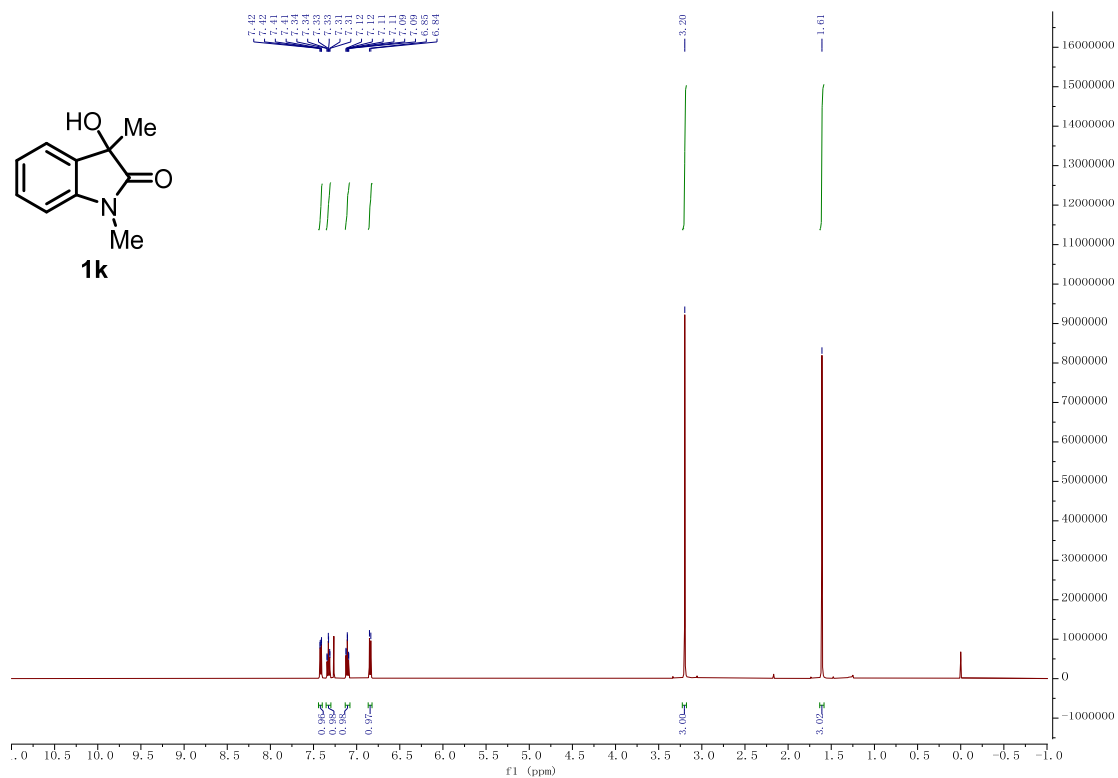

ethyl 2-(3-hydroxy-1-methyl-2-oxindolin-3-yl) acetate (**1l**). <sup>1</sup>H NMR (500 MHz, CDCl<sub>3</sub>)

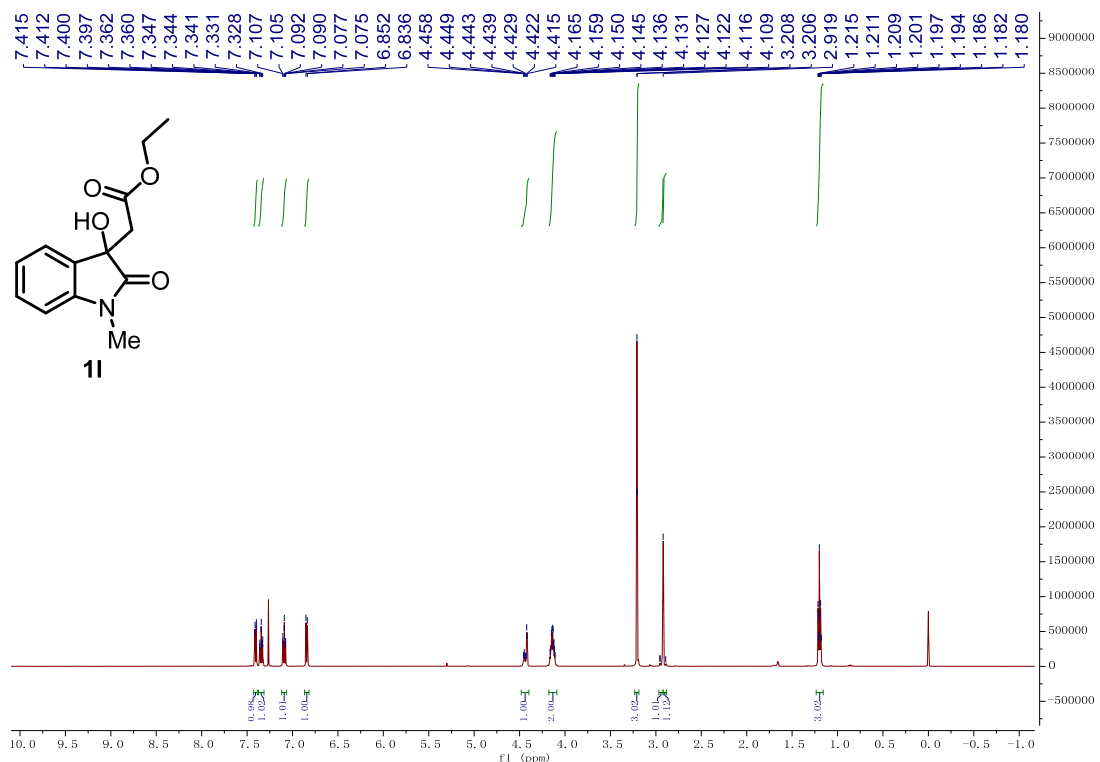

1,3-diethyl-3-hydroxyindolin-2-one (**1m**). <sup>1</sup>H NMR (500 MHz, CDCl<sub>3</sub>)

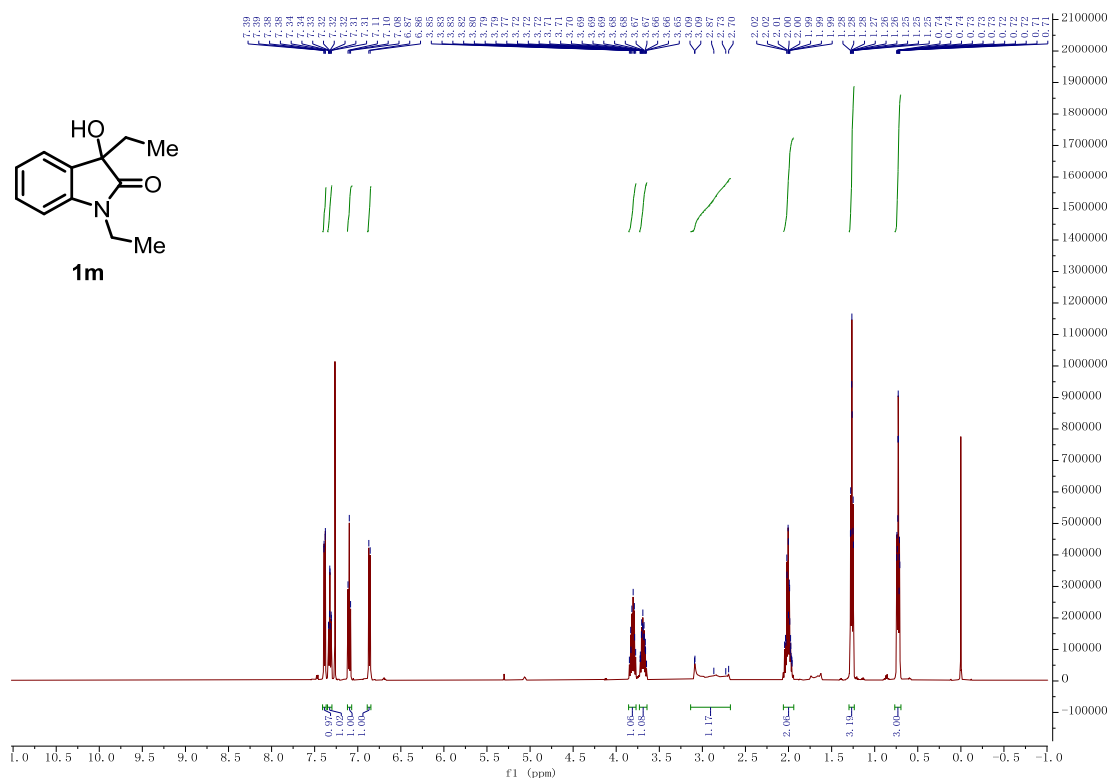

**3-ethyl-3-hydroxy-1-phenylindolin-2-one (1n).**  $^1\text{H}$  NMR (500 MHz,  $\text{DMSO-}d_6$ )

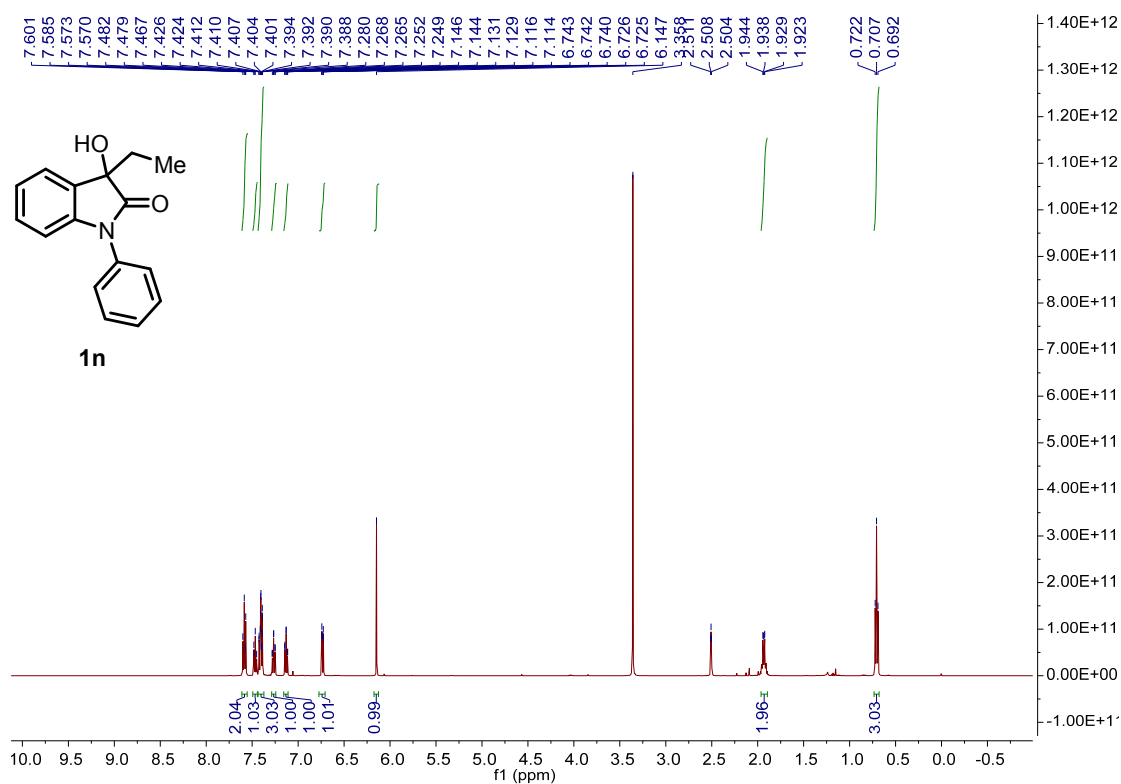

**3-ethyl-3-hydroxy-1-phenylindolin-2-one (1n).**  $^{13}\text{C}$  NMR (125 MHz,  $\text{DMSO-}d_6$ )

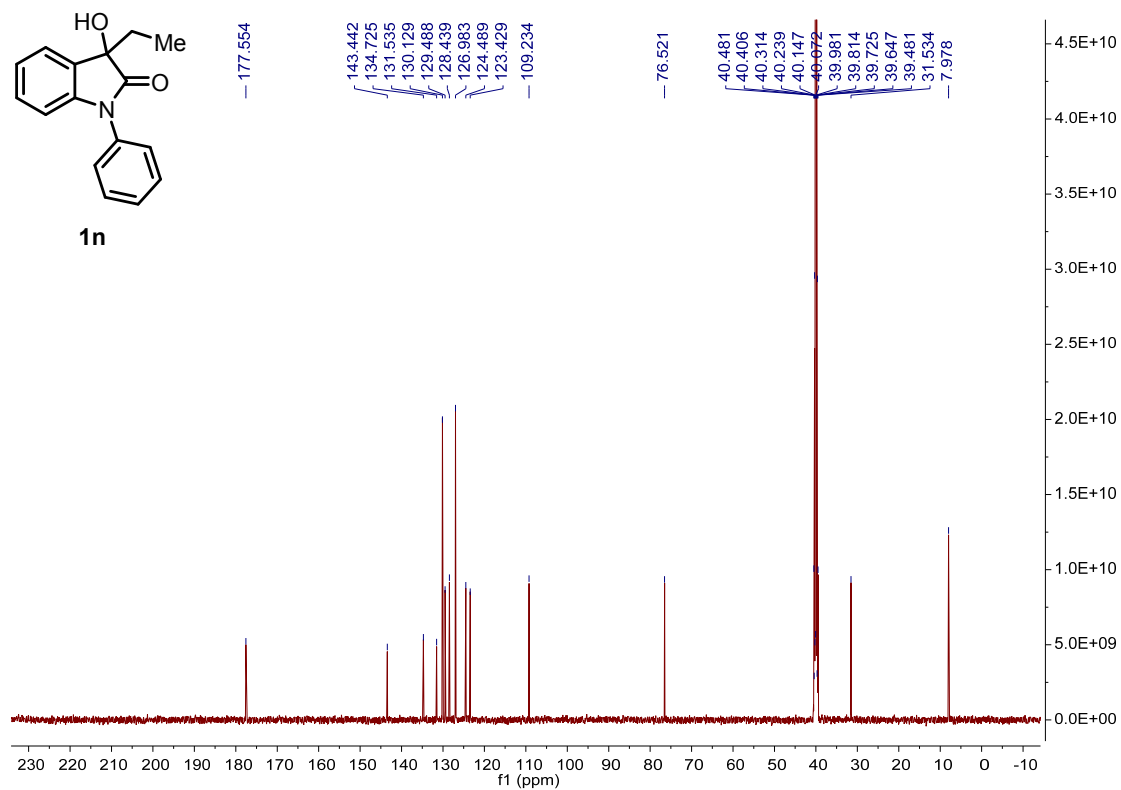



1,3-dimethyl-2-phenylquinolin-4(1H)-one (3a). <sup>1</sup>H NMR (500 MHz, CDCl<sub>3</sub>)

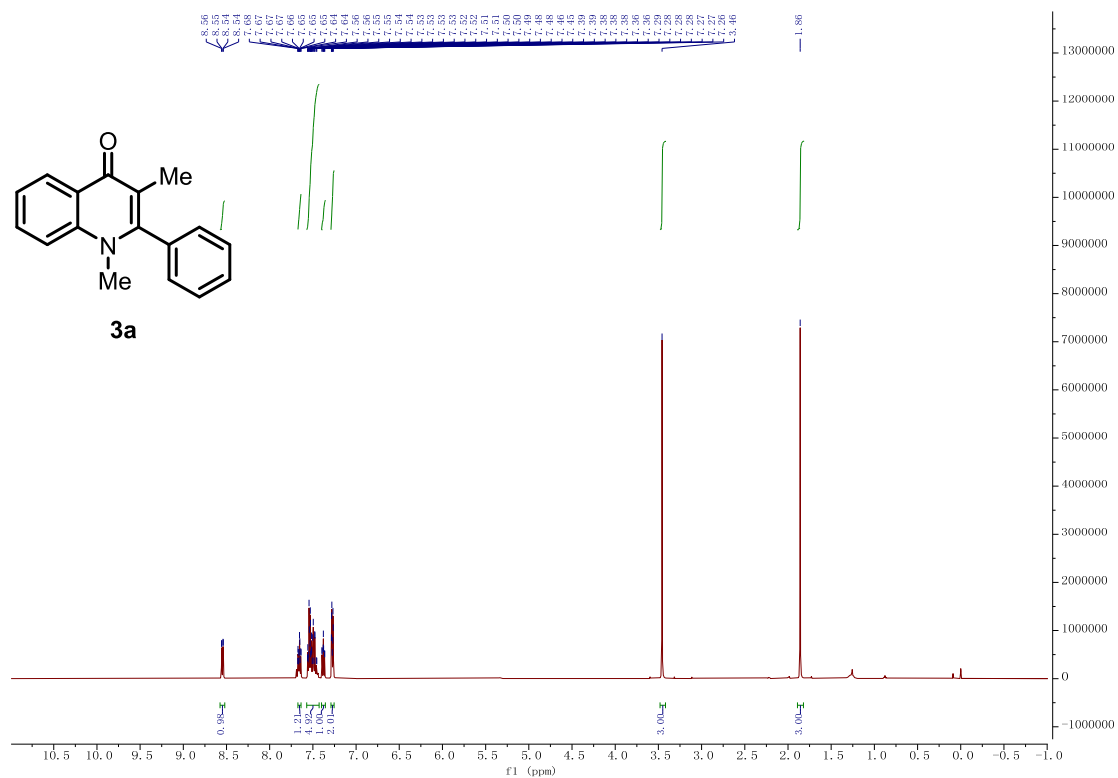

1,3-dimethyl-2-(*o*-tolyl)quinolin-4(1H)-one (3b). <sup>1</sup>H NMR (500 MHz, CDCl<sub>3</sub>)

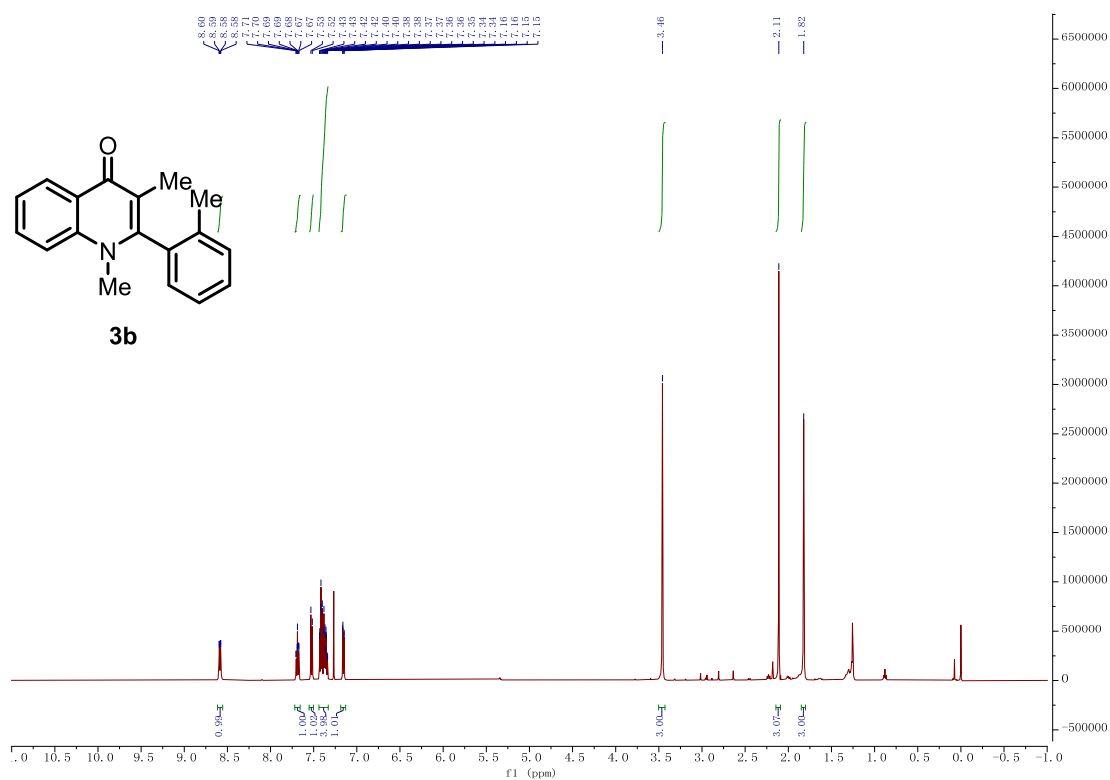







**2-(3-fluorophenyl)-1,3-dimethylquinolin-4(1H)-one (3d).  $^{19}\text{F}$  NMR (470 MHz,  $\text{CDCl}_3$ )**

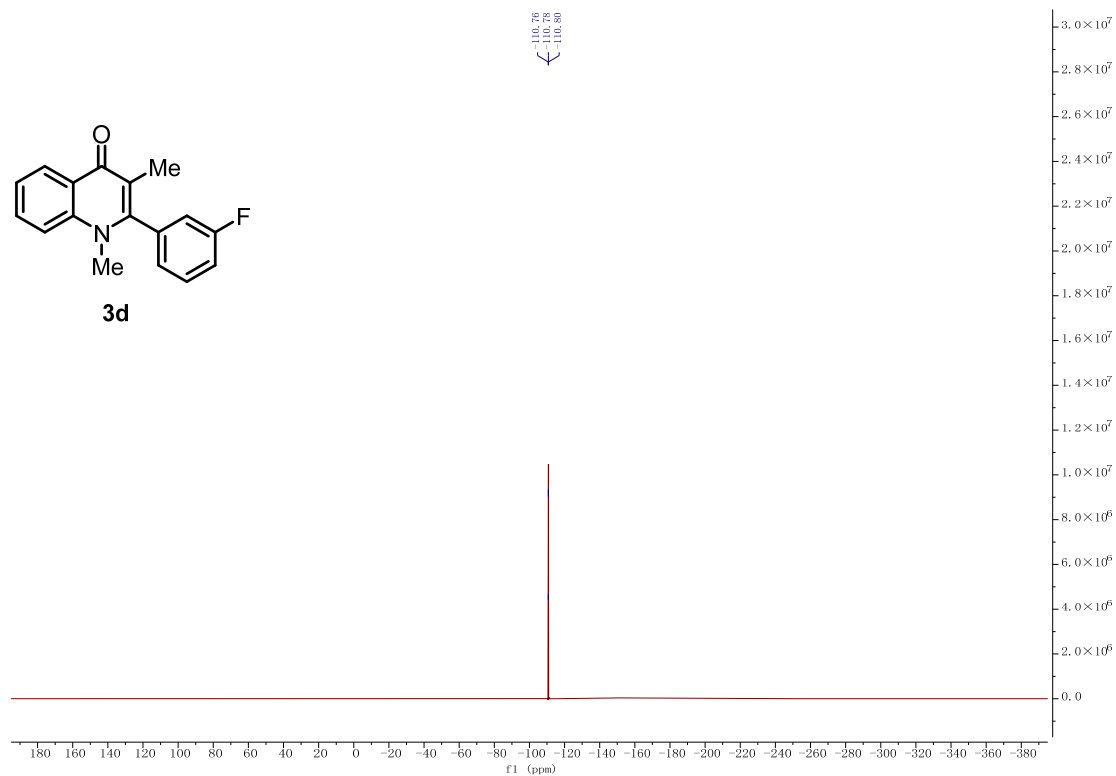

**1,3-dimethyl-2-(p-tolyl)quinolin-4(1H)-one (3e).  $^1\text{H}$  NMR (500 MHz,  $\text{CDCl}_3$ )**

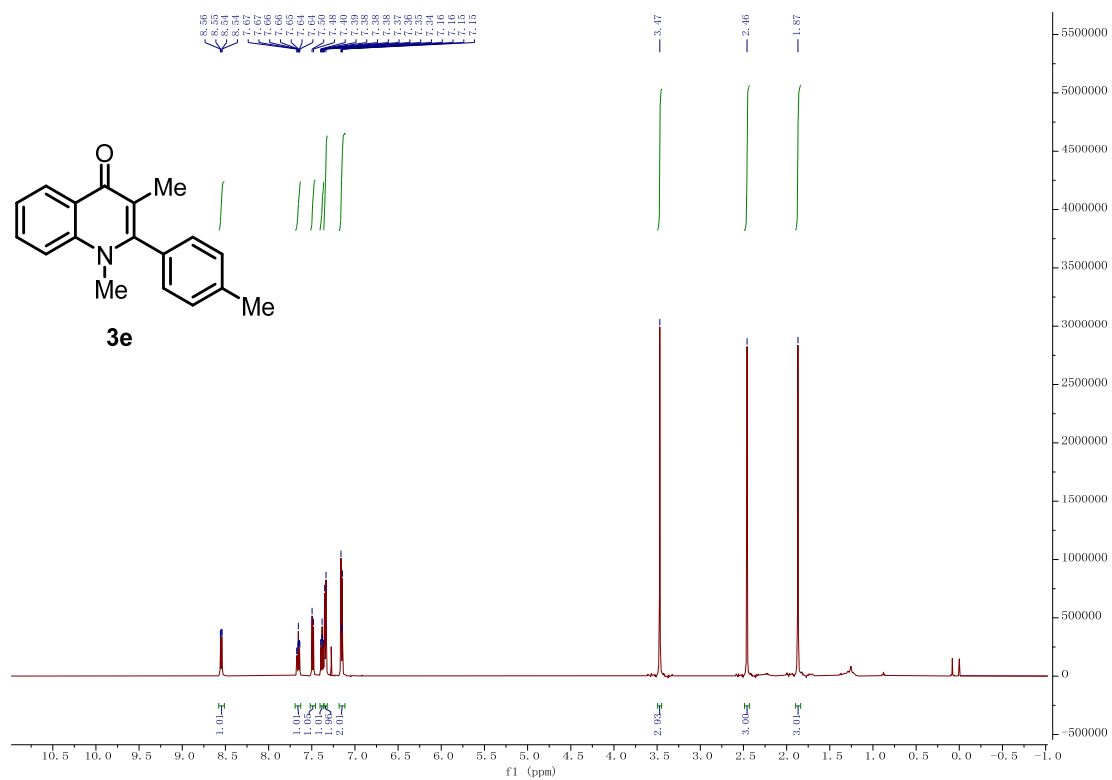

1,3-dimethyl-2-(p-tolyl)quinolin-4(1*H*)-one (**3e**). <sup>13</sup>C NMR (125 MHz, CDCl<sub>3</sub>)

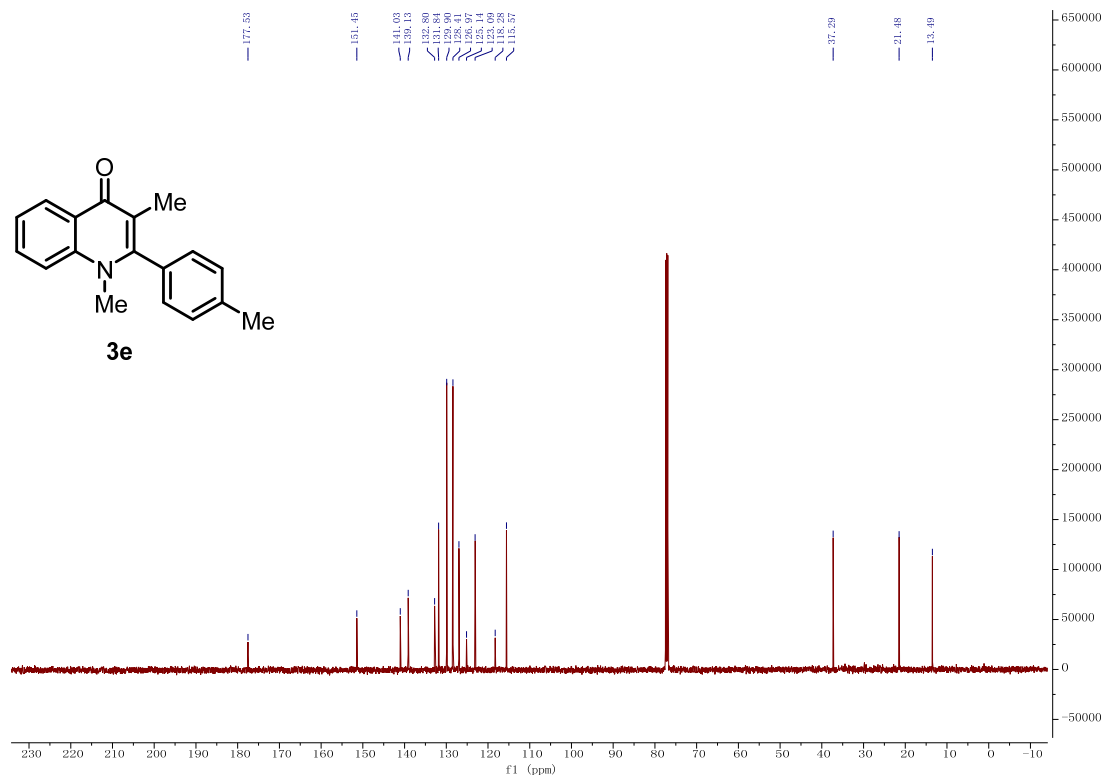

2-(4-fluorophenyl)-1,3-dimethylquinolin-4(1*H*)-one (**3f**). <sup>1</sup>H NMR (500 MHz, CDCl<sub>3</sub>)

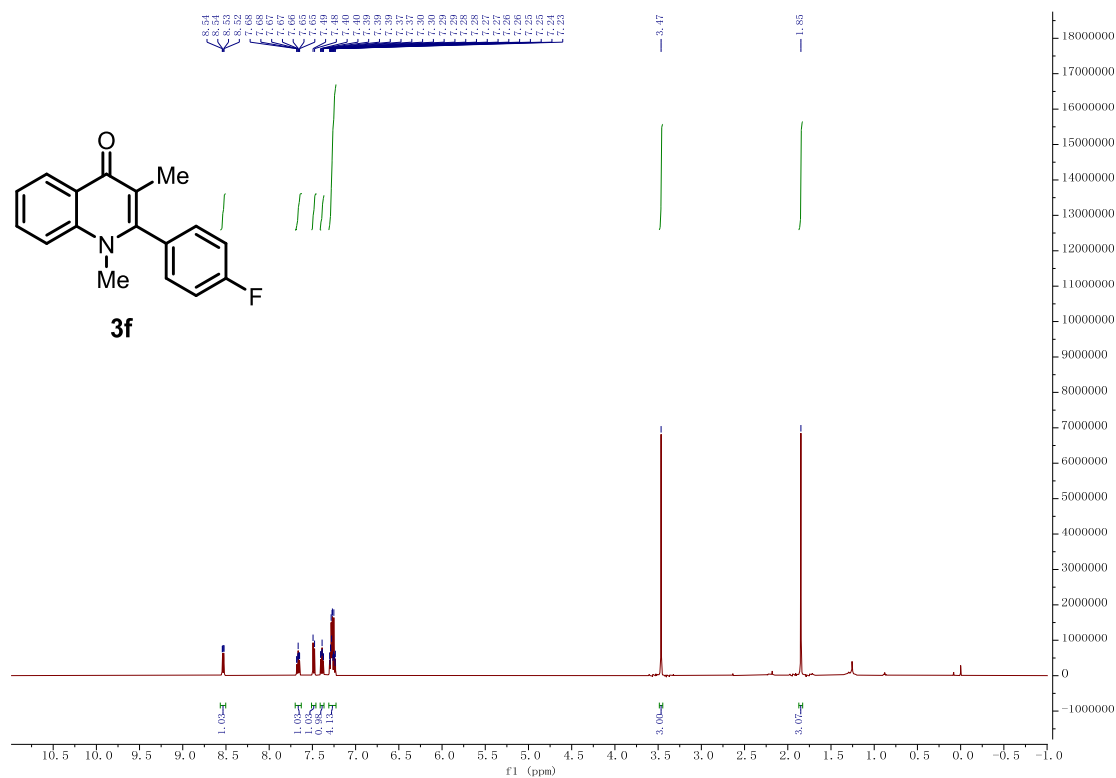

2-(4-fluorophenyl)-1,3-dimethylquinolin-4(1H)-one (3f). <sup>19</sup>F NMR (470 MHz, CDCl<sub>3</sub>)

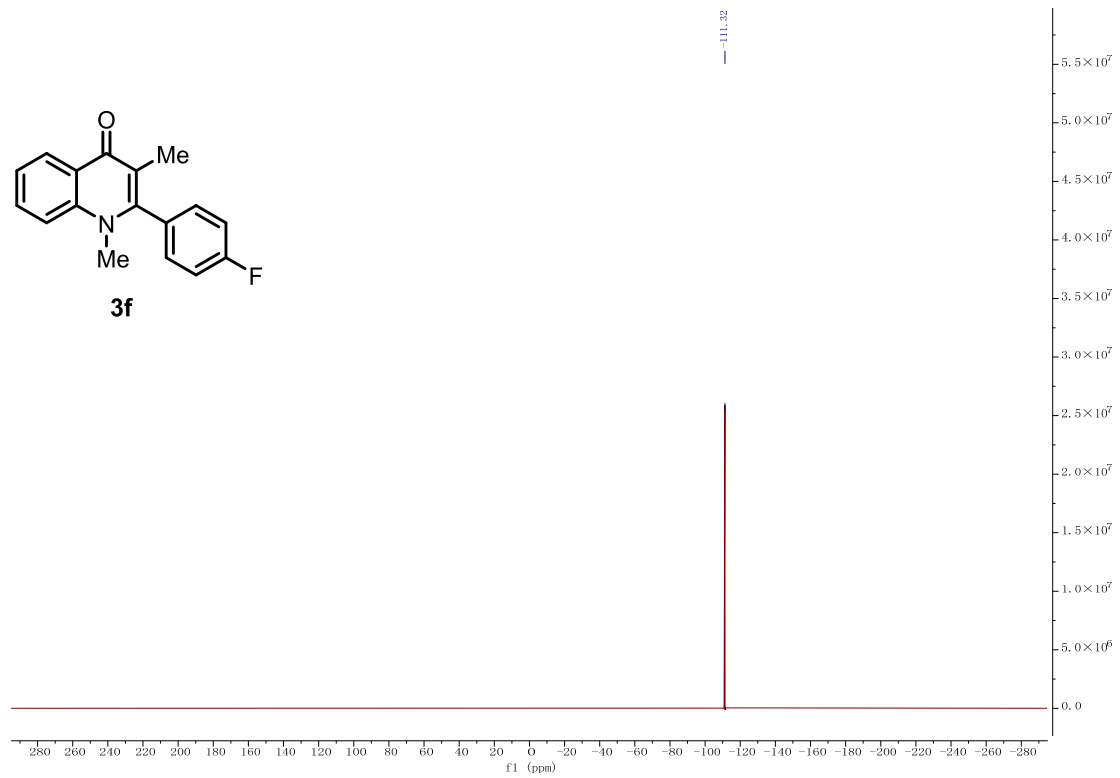

2-(4-chlorophenyl)-1,3-dimethylquinolin-4(1H)-one (3g). <sup>1</sup>H NMR (500 MHz, CDCl<sub>3</sub>)

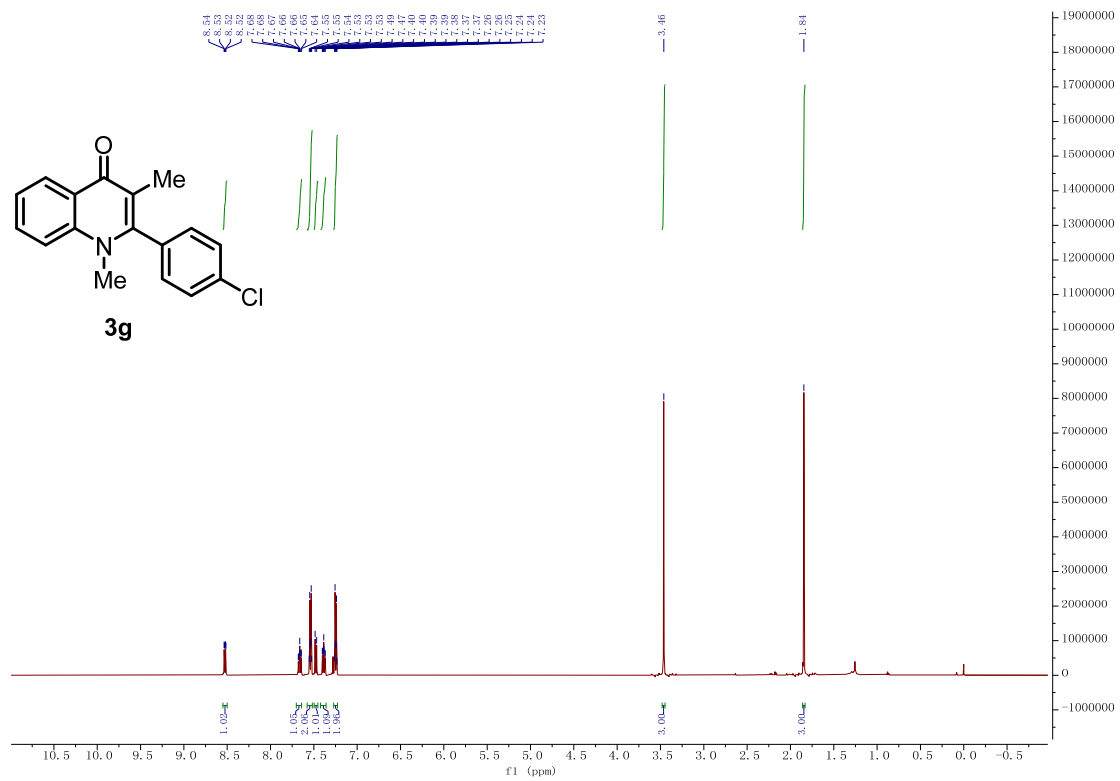



**1,3-dimethyl-2-(4-(trifluoromethyl)phenyl)quinolin-4(1H)-one (3h). <sup>13</sup>C NMR (125 MHz, CDCl<sub>3</sub>)**

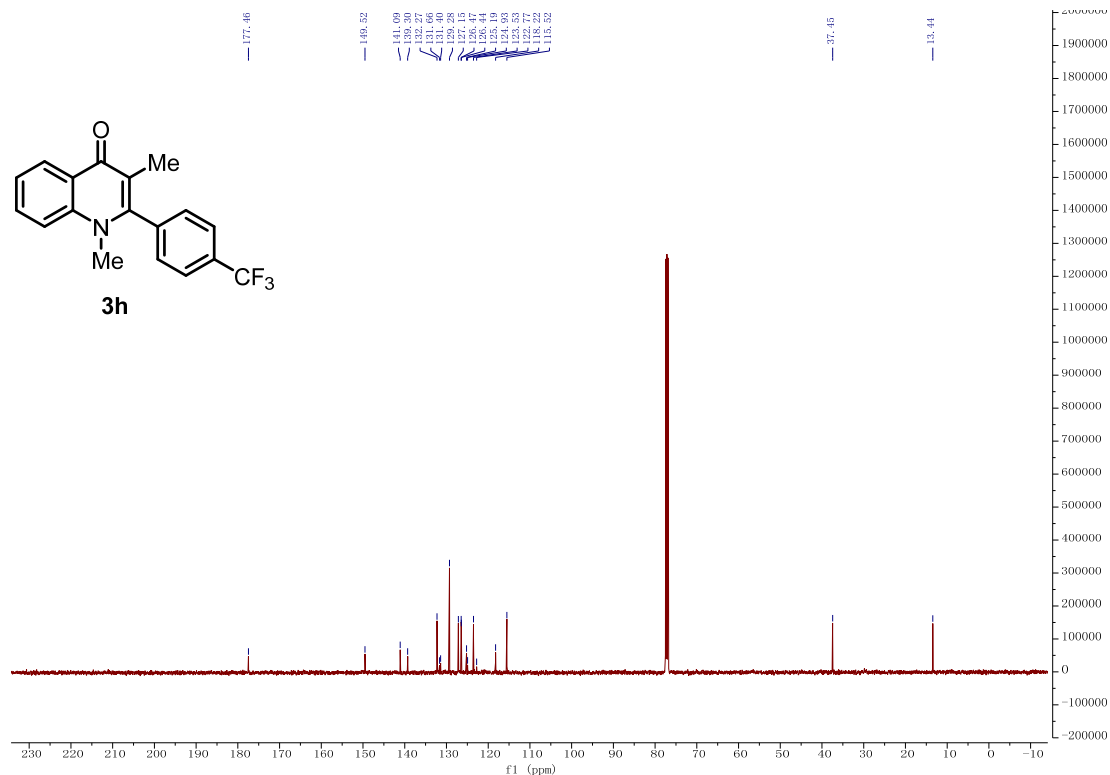

**1,3-dimethyl-2-(4-(trifluoromethyl)phenyl)quinolin-4(1H)-one (3h). <sup>19</sup>F NMR (470 MHz, CDCl<sub>3</sub>)**

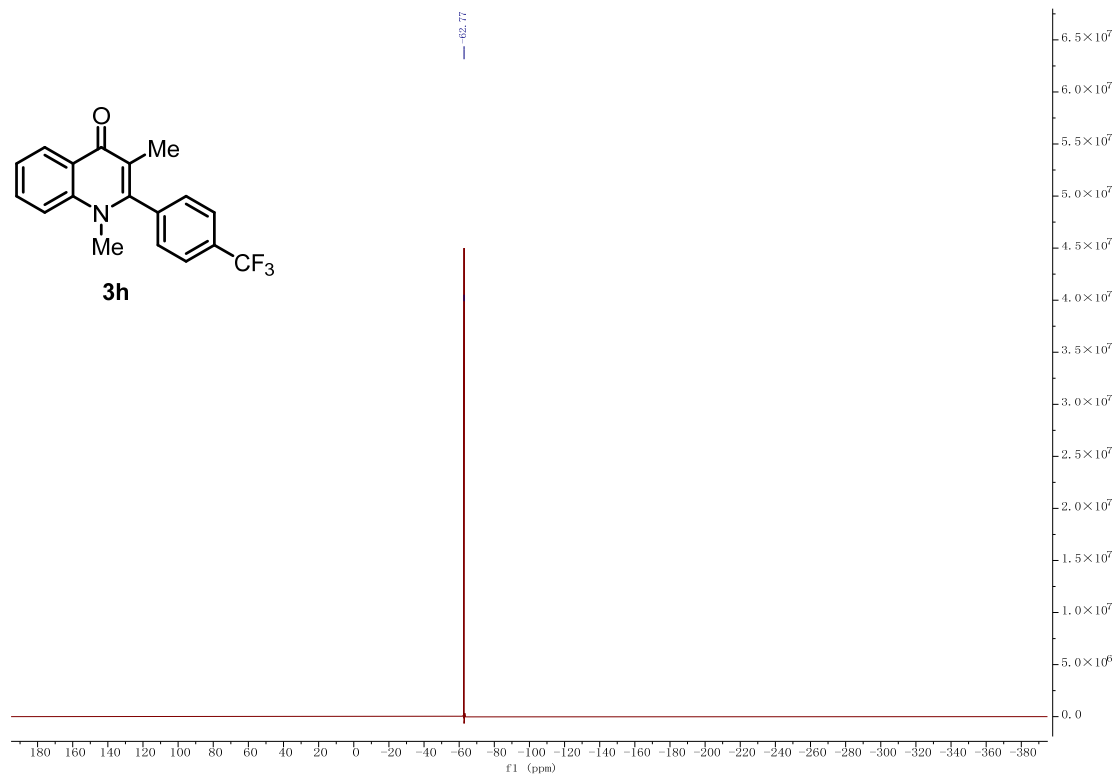

2-(4-methoxyphenyl)-1,3-dimethylquinolin-4(1H)-one (**3i**).  $^1\text{H}$  NMR (500 MHz,  $\text{CDCl}_3$ )

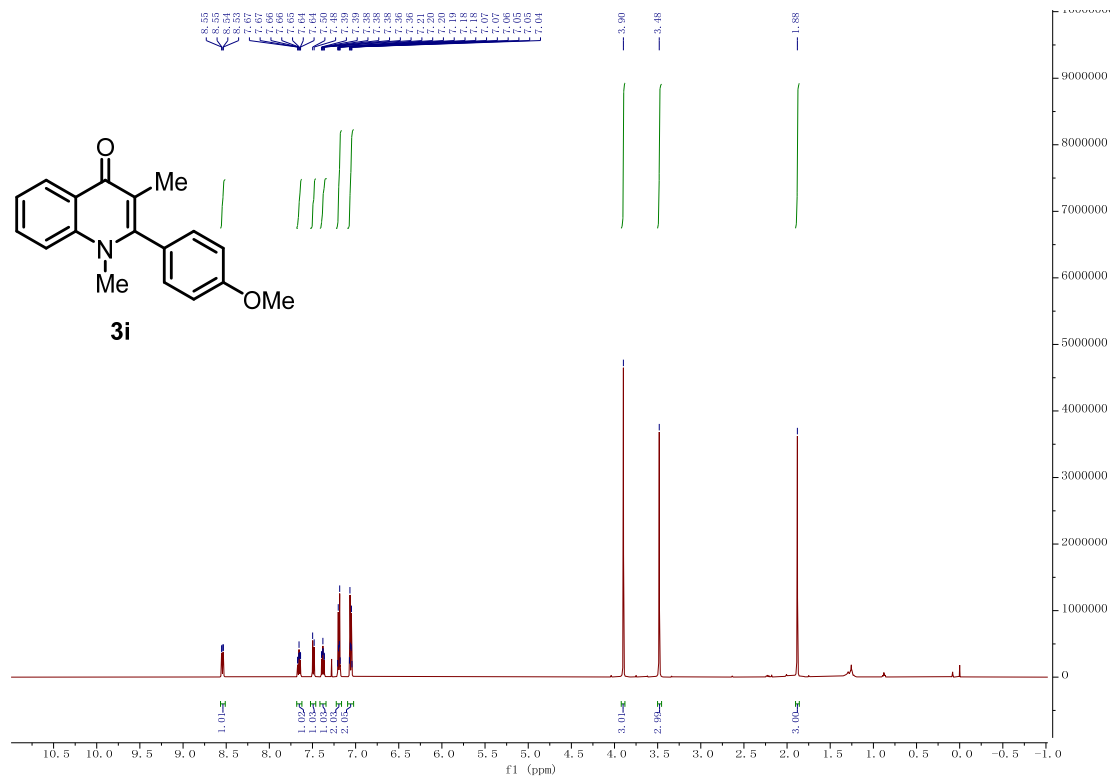

1,3-dimethyl-2-(4-(trifluoromethoxy)phenyl)quinolin-4(1H)-one (**3j**).  $^1\text{H}$  NMR (500 MHz,  $\text{CDCl}_3$ )

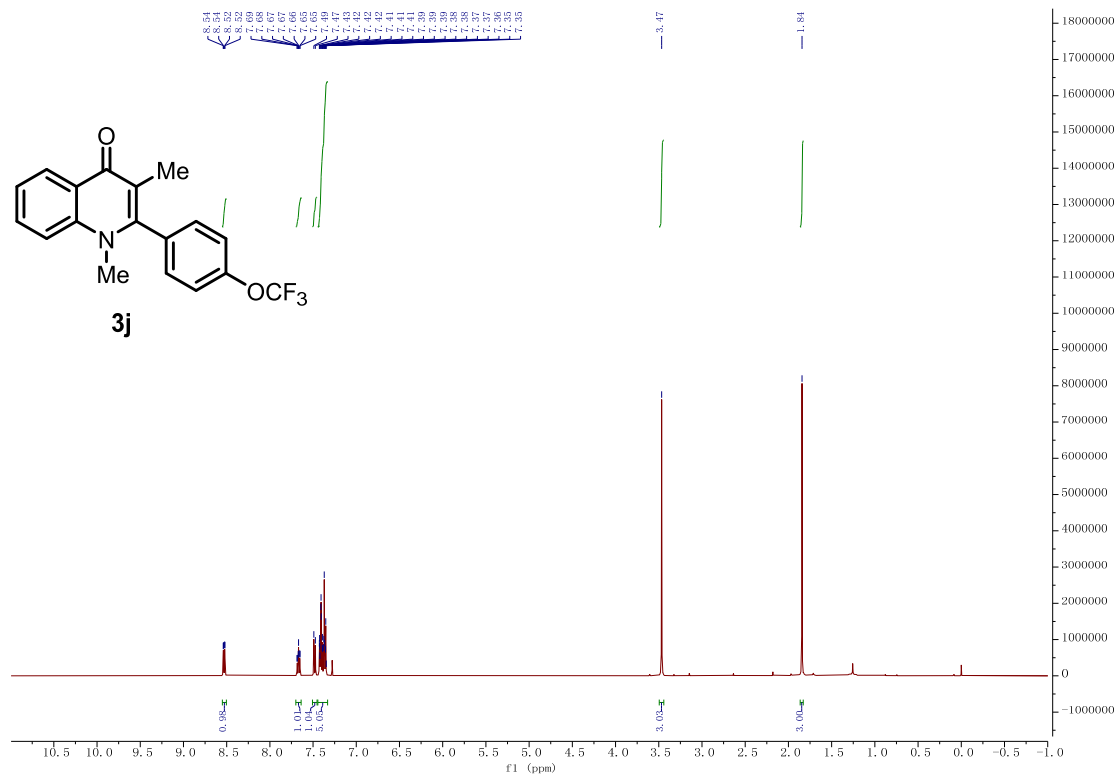

**1,3-dimethyl-2-(4-(trifluoromethoxy)phenyl)quinolin-4(1H)-one (3j).**  $^{13}\text{C}$  NMR (125 MHz,  $\text{CDCl}_3$ )

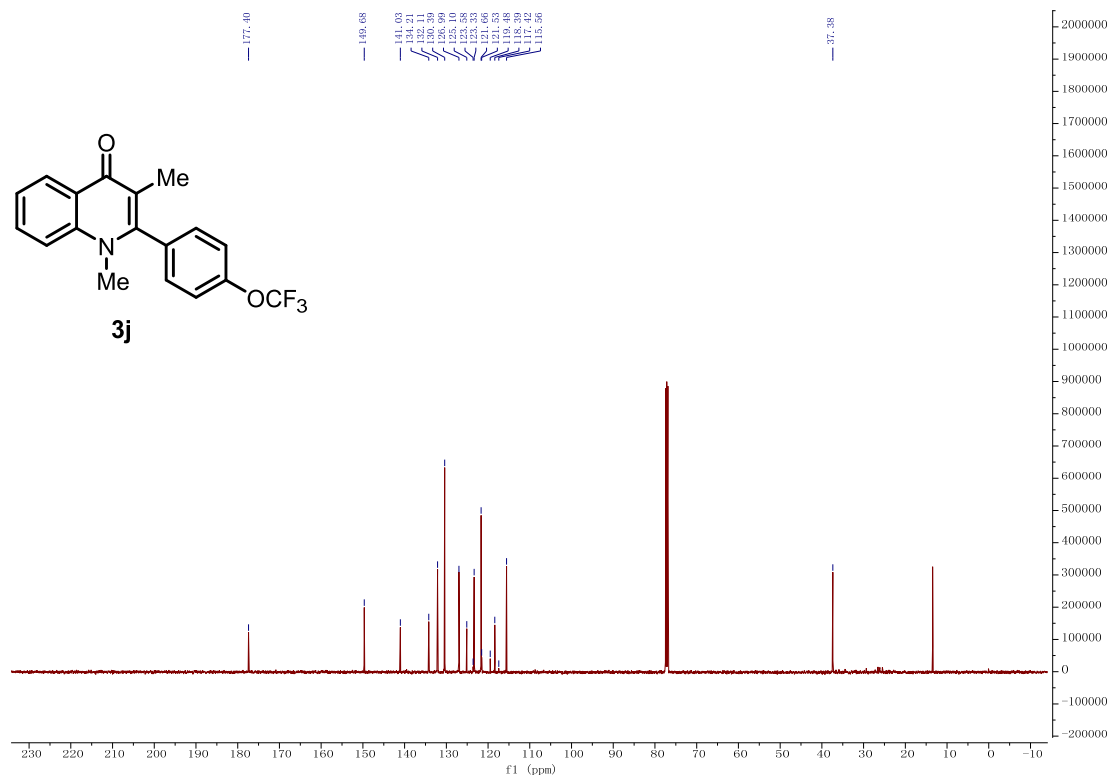

**1,3-dimethyl-2-(4-(trifluoromethoxy)phenyl)quinolin-4(1H)-one (3j).**  $^{19}\text{F}$  NMR (470 MHz,  $\text{CDCl}_3$ )

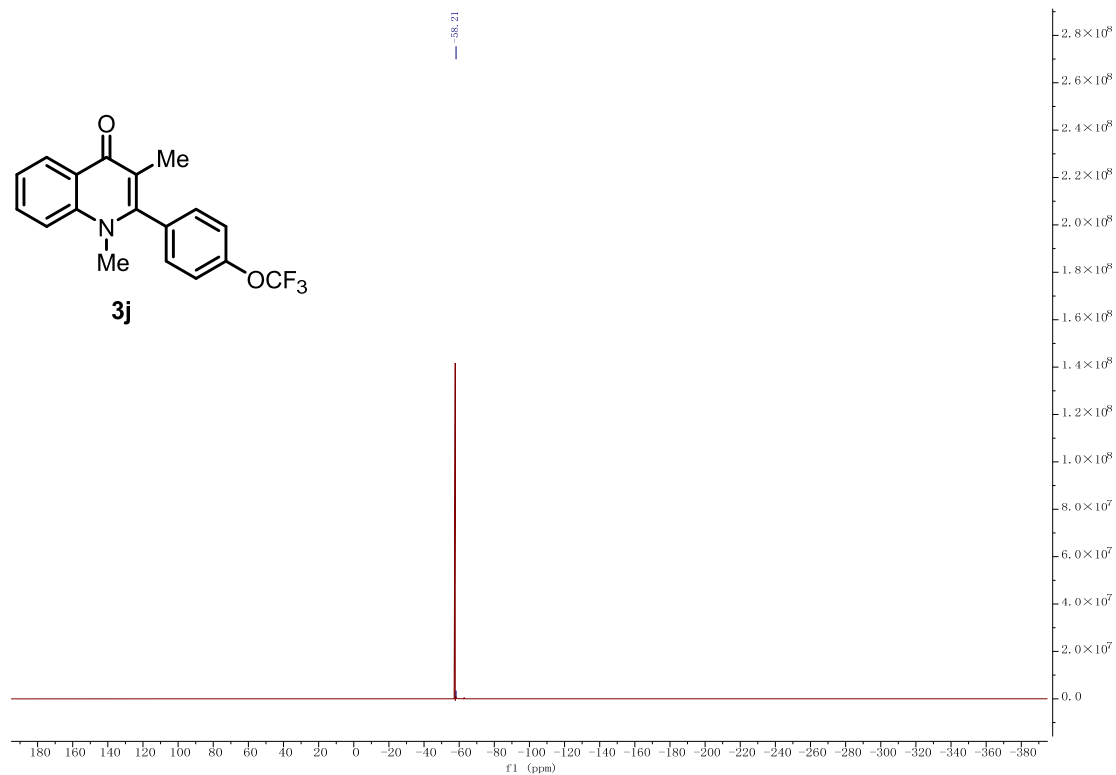



1,3-dimethyl-2-(4-(trimethylsilyl)phenyl)quinolin-4(1H)-one (3k).  $^1\text{H}$  NMR (500 MHz,  $\text{CDCl}_3$ )

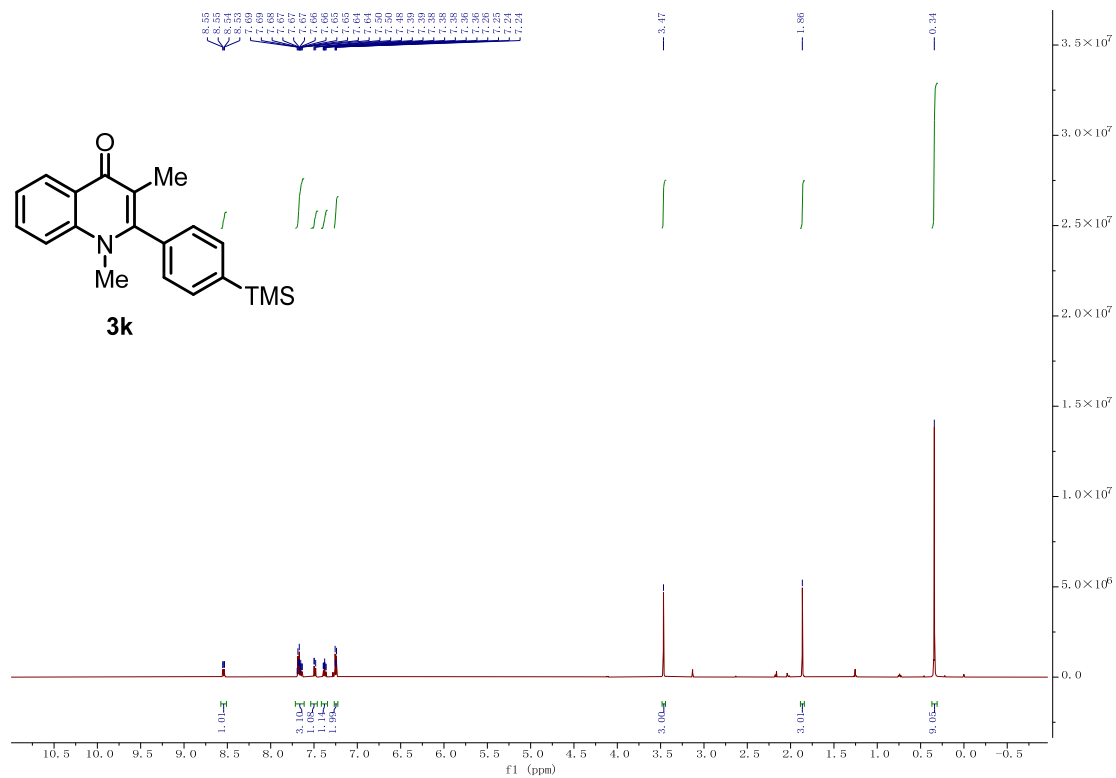

1,3-dimethyl-2-(4-(trimethylsilyl)phenyl)quinolin-4(1H)-one (3k).  $^{13}\text{C}$  NMR (125 MHz,  $\text{CDCl}_3$ )

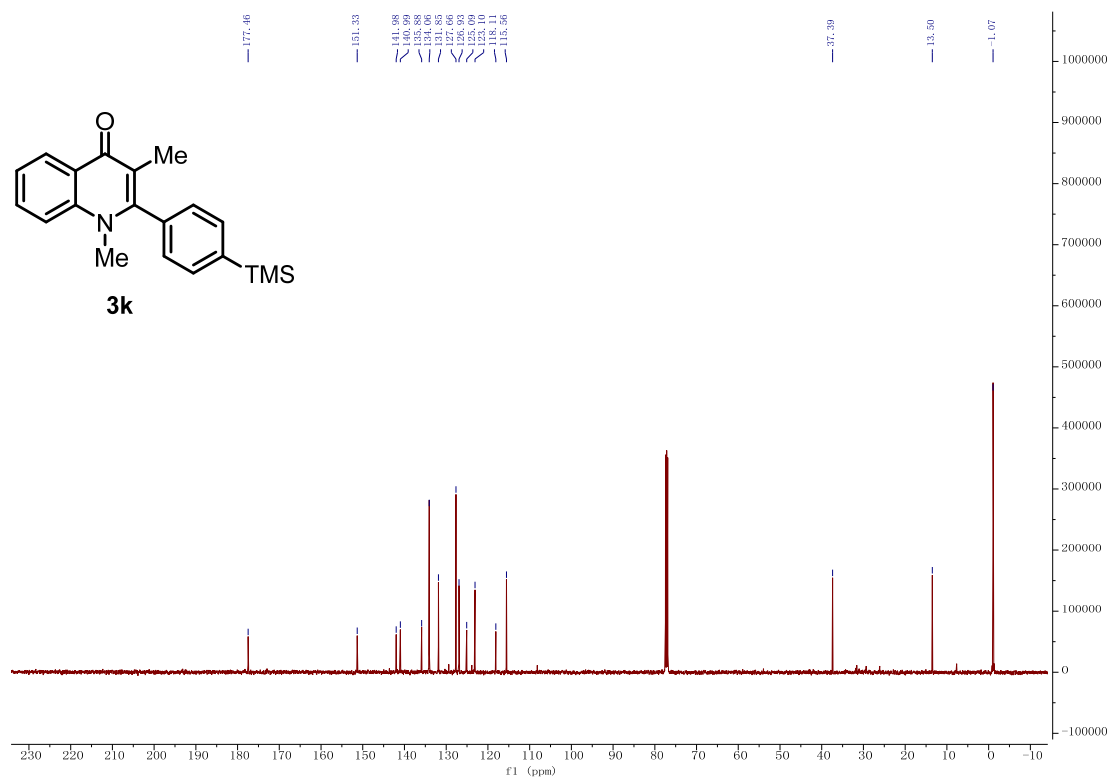

2-([1,1'-biphenyl]-4-yl)-1,3-dimethylquinolin-4(1H)-one (31). <sup>1</sup>H NMR (500 MHz, CDCl<sub>3</sub>)

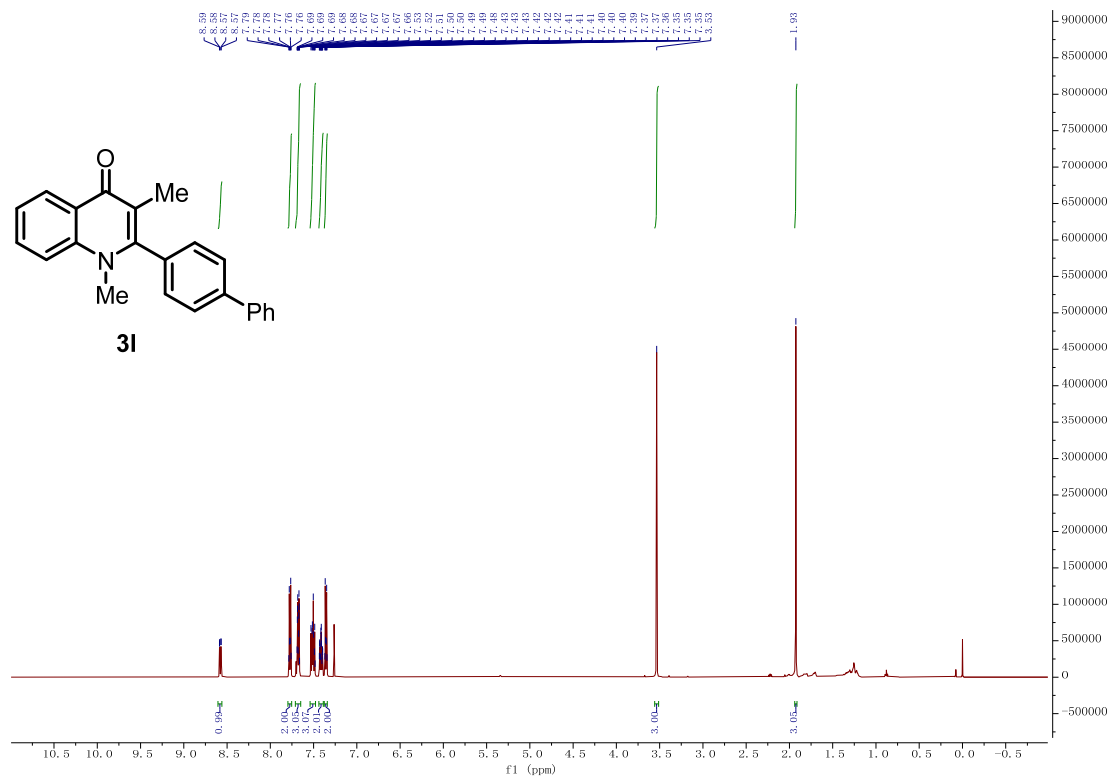

2-([1,1'-biphenyl]-4-yl)-1,3-dimethylquinolin-4(1H)-one (31). <sup>13</sup>C NMR (125 MHz, CDCl<sub>3</sub>)

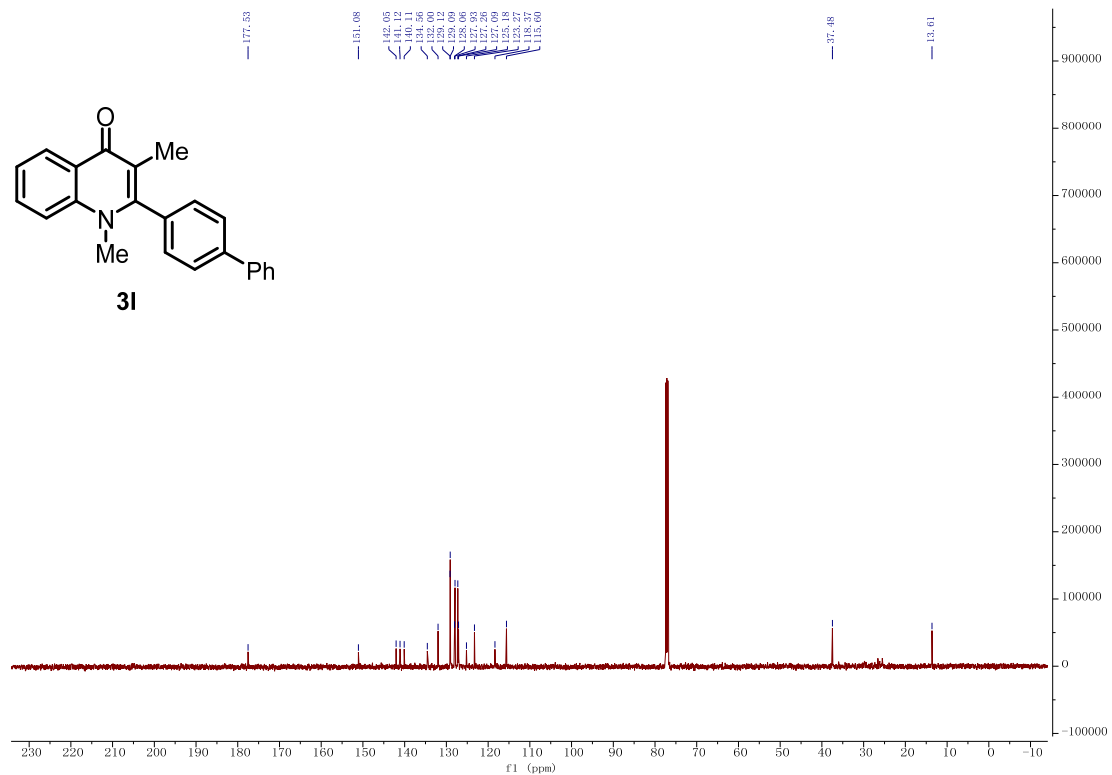

2-(3,5-dimethylphenyl)-1,3-dimethylquinolin-4(1H)-one (3m). <sup>1</sup>H NMR (500 MHz, CDCl<sub>3</sub>)

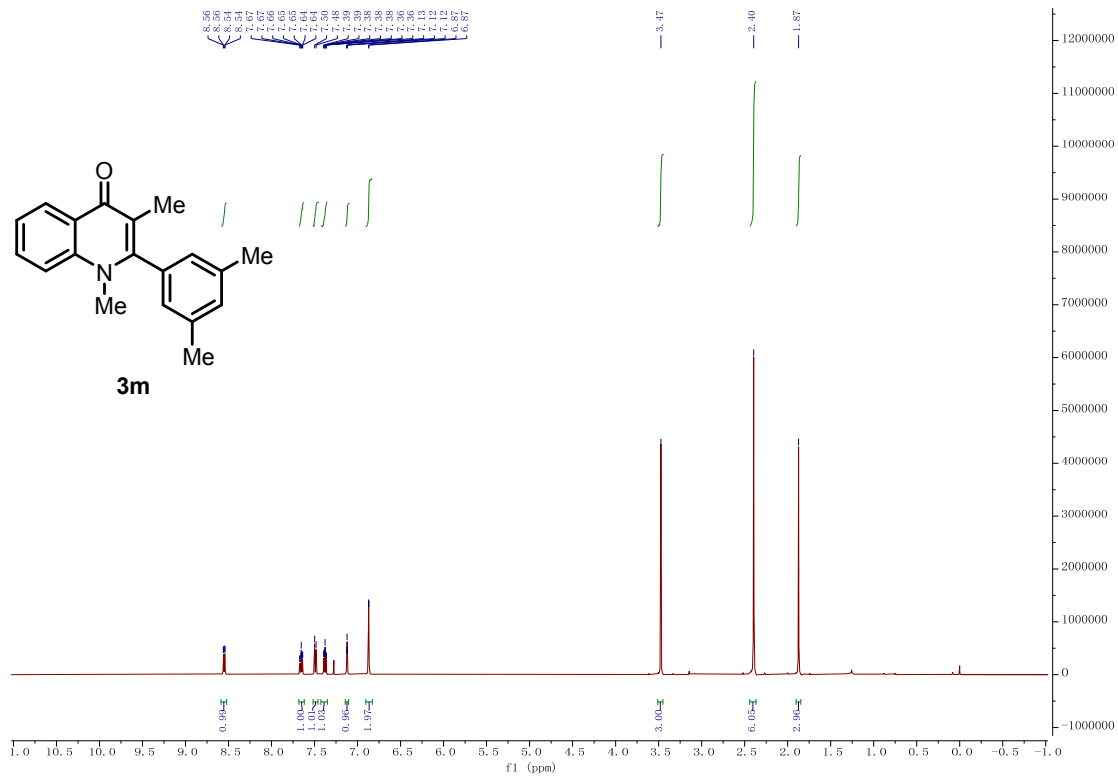

2-(3,5-dimethylphenyl)-1,3-dimethylquinolin-4(1H)-one (3m). <sup>13</sup>C NMR (125 MHz, CDCl<sub>3</sub>)

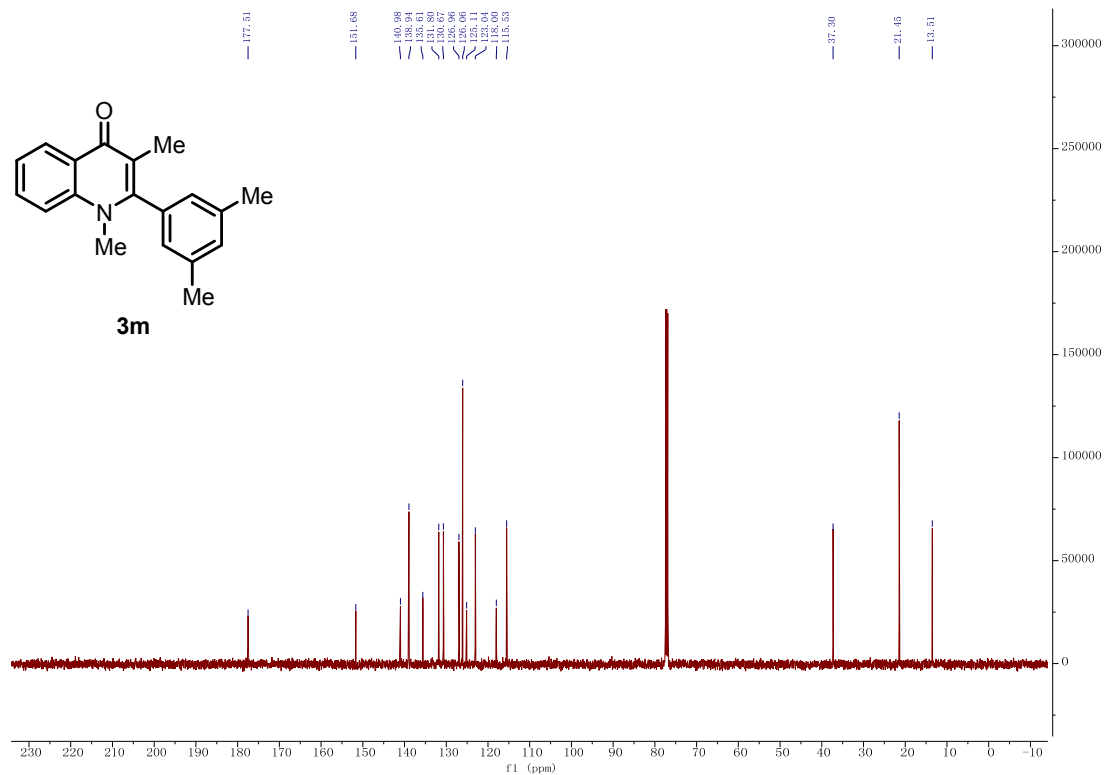

1,3-dimethyl-2-(naphthalen-2-yl)quinolin-4(1H)-one (3n). <sup>1</sup>H NMR (500 MHz, CDCl<sub>3</sub>)

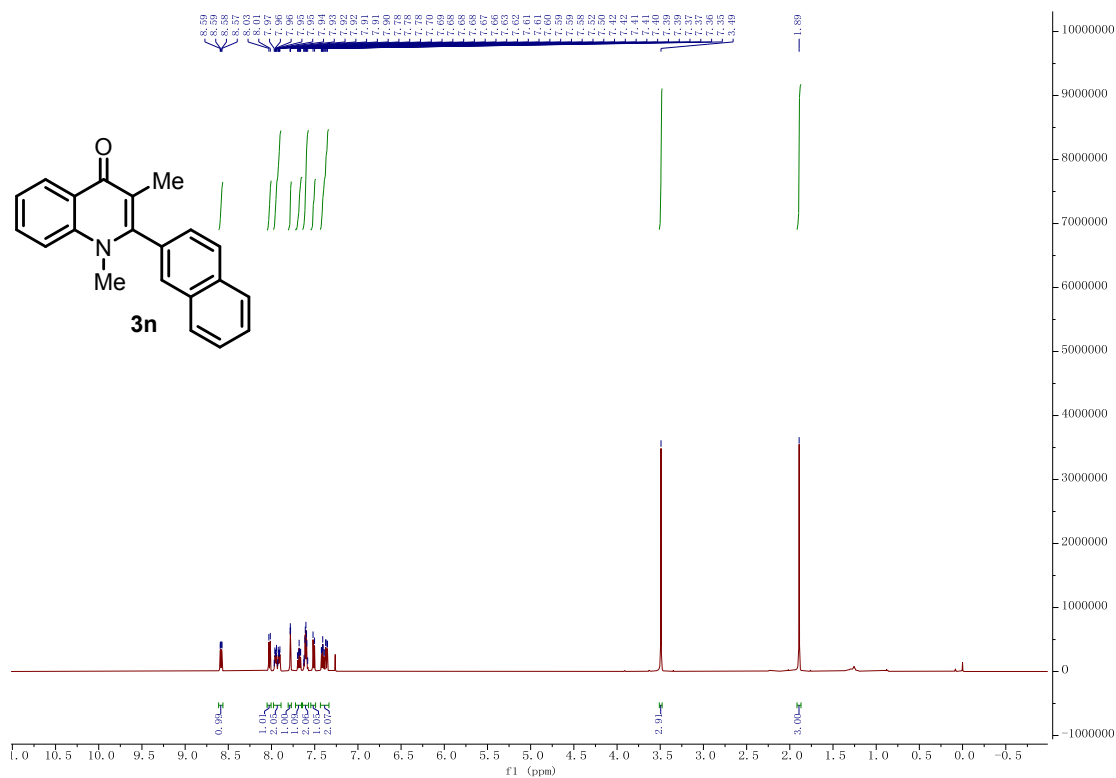

1,3-dimethyl-2-(naphthalen-2-yl)quinolin-4(1H)-one (3n). <sup>13</sup>C NMR (125 MHz, CDCl<sub>3</sub>)

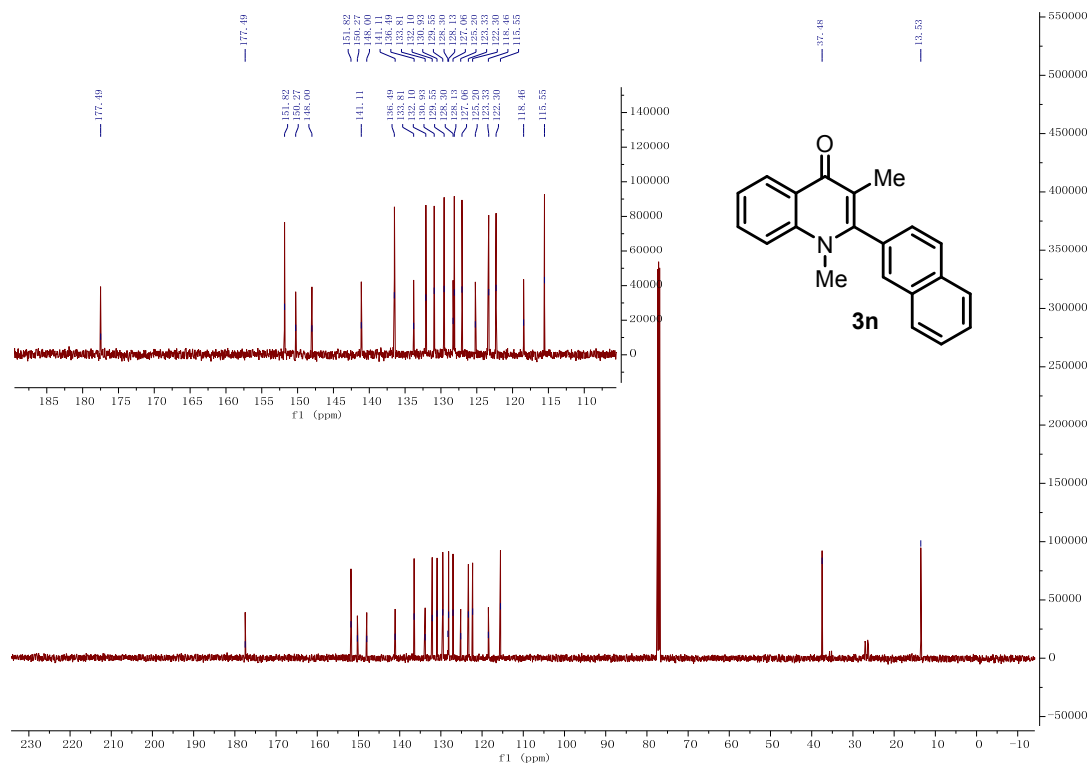

**2-(2,3-dihydrobenzofuran-5-yl)-1,3-dimethylquinolin-4(1H)-one (3o). <sup>1</sup>H NMR (500 MHz, CDCl<sub>3</sub>)**

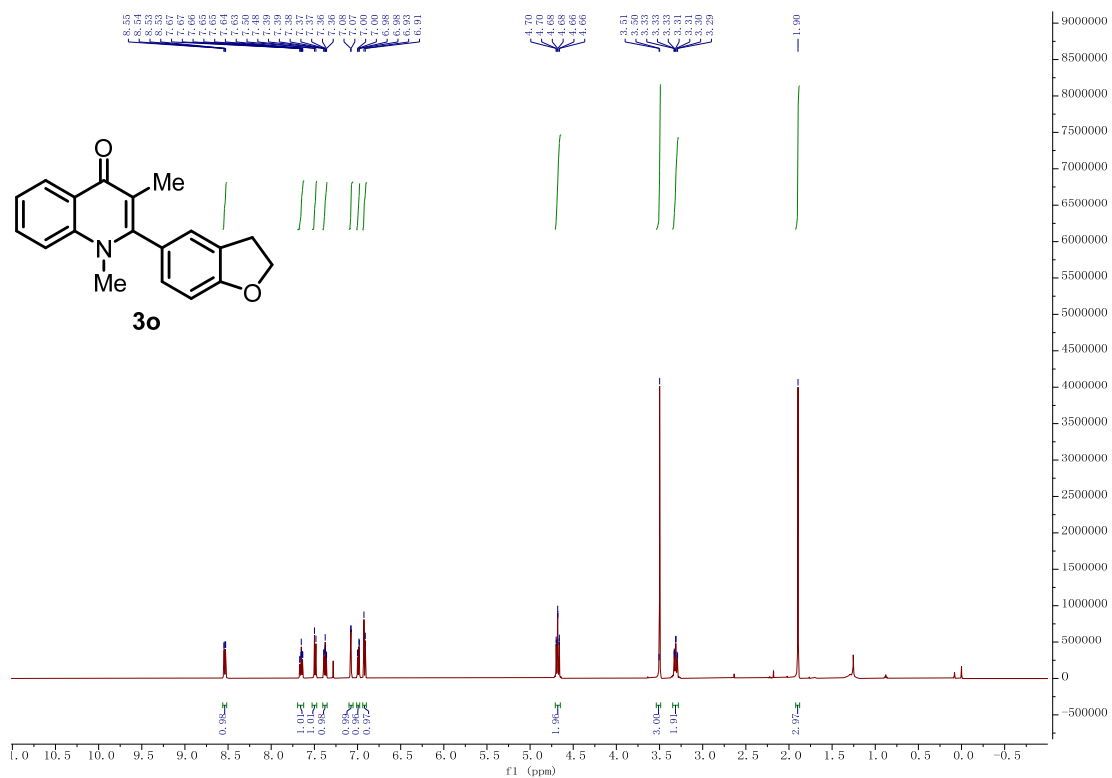

**2-(2,3-dihydrobenzofuran-5-yl)-1,3-dimethylquinolin-4(1H)-one (3o). <sup>13</sup>C NMR (125 MHz, CDCl<sub>3</sub>)**

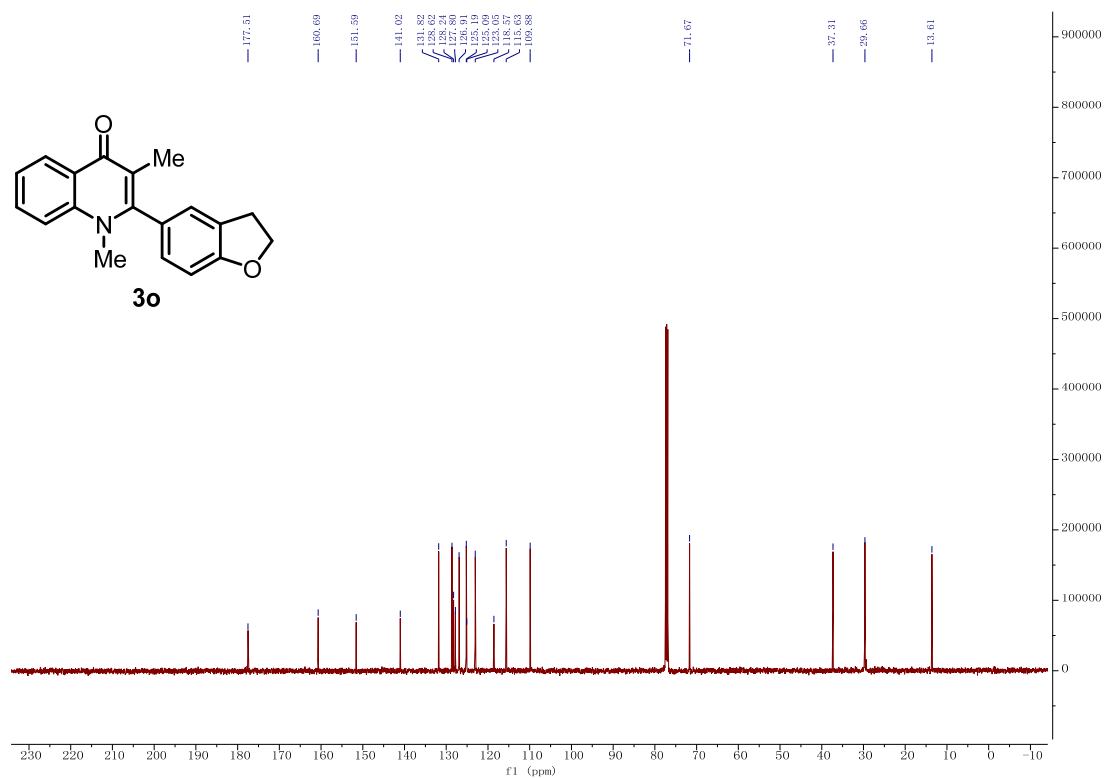



2-(benzo[b]thiophen-5-yl)-1,3-dimethylquinolin-4(1H)-one (3q). <sup>1</sup>H NMR (500 MHz, CDCl<sub>3</sub>)

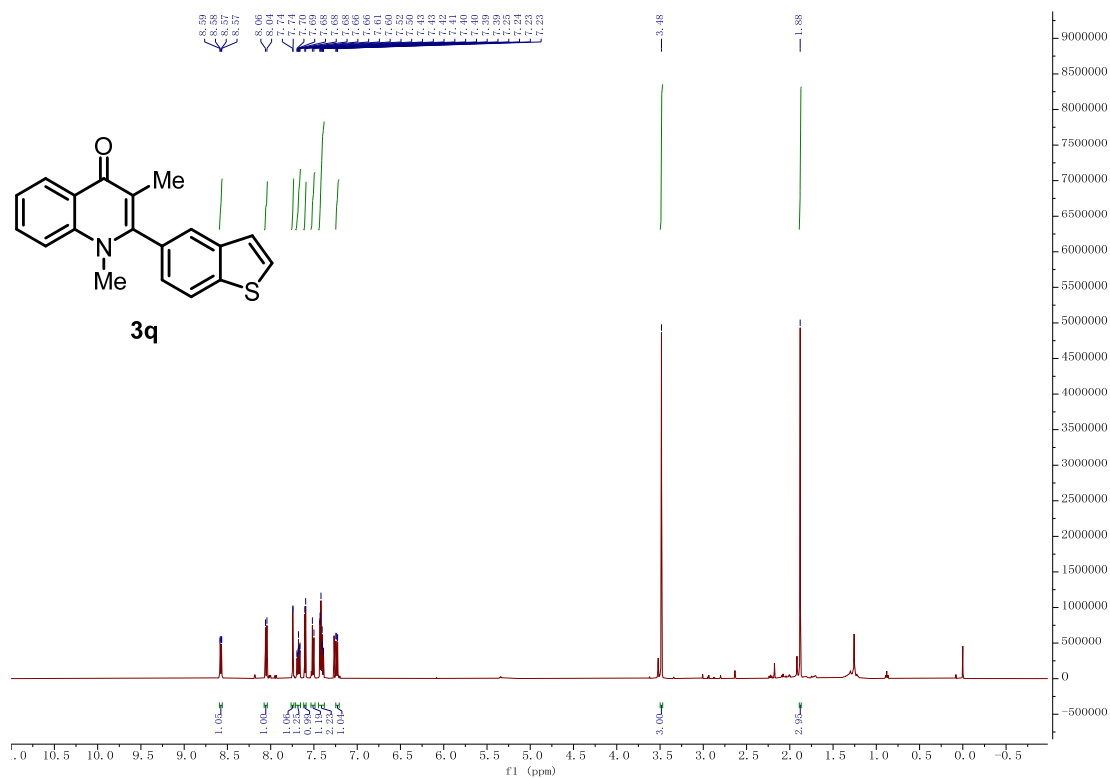

2-(benzo[b]thiophen-5-yl)-1,3-dimethylquinolin-4(1H)-one (3q). <sup>13</sup>C NMR (125 MHz, CDCl<sub>3</sub>)

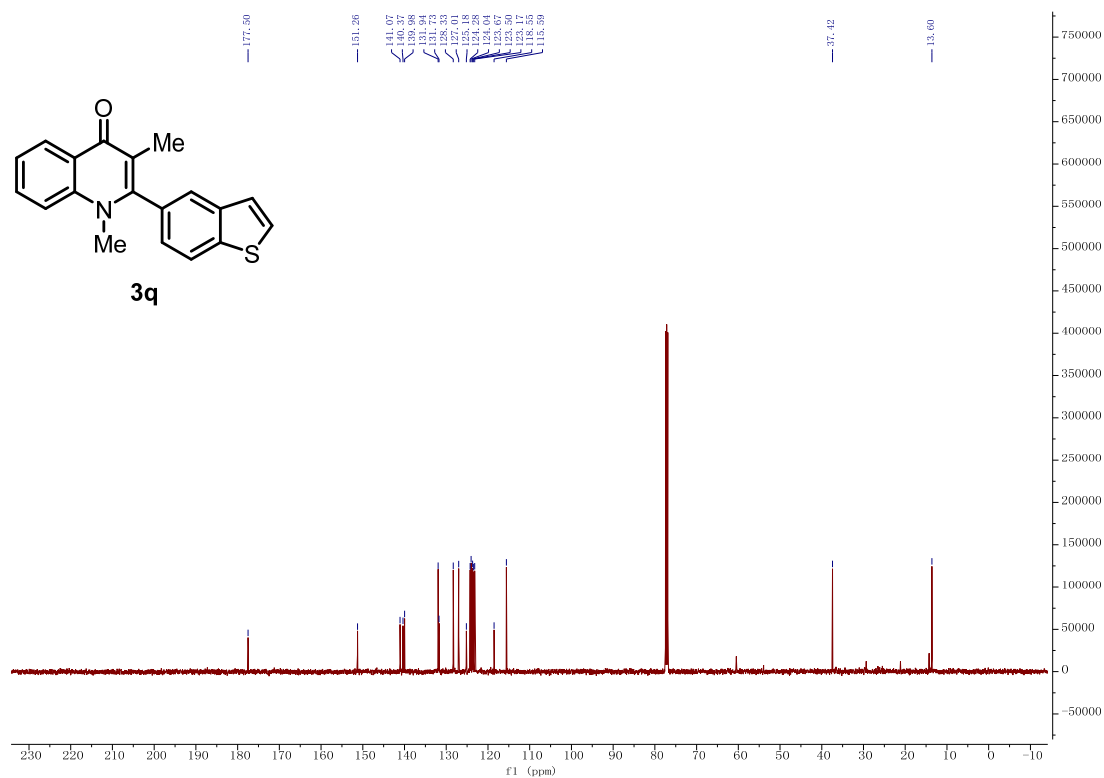

1,3-dimethyl-[2,6'-biquinolin]-4(1*H*)-one (3r). <sup>1</sup>H NMR (500 MHz, CDCl<sub>3</sub>)

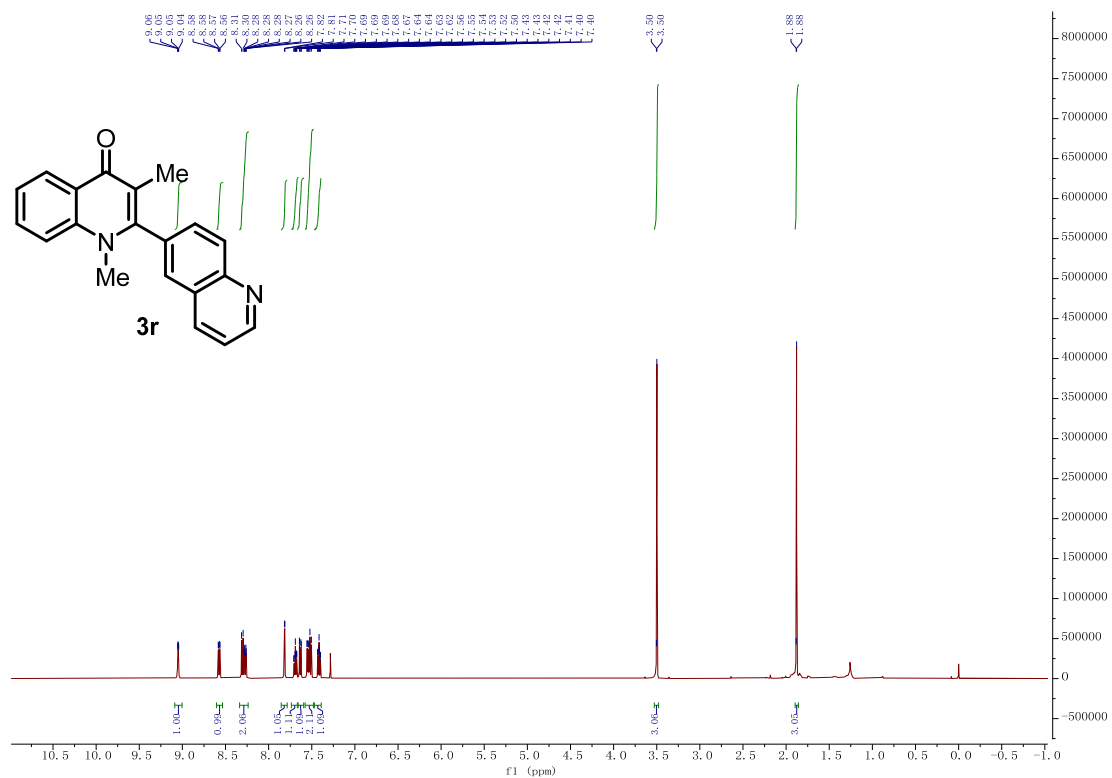

1,3-dimethyl-[2,6'-biquinolin]-4(1*H*)-one (3r). <sup>13</sup>C NMR (125 MHz, CDCl<sub>3</sub>)

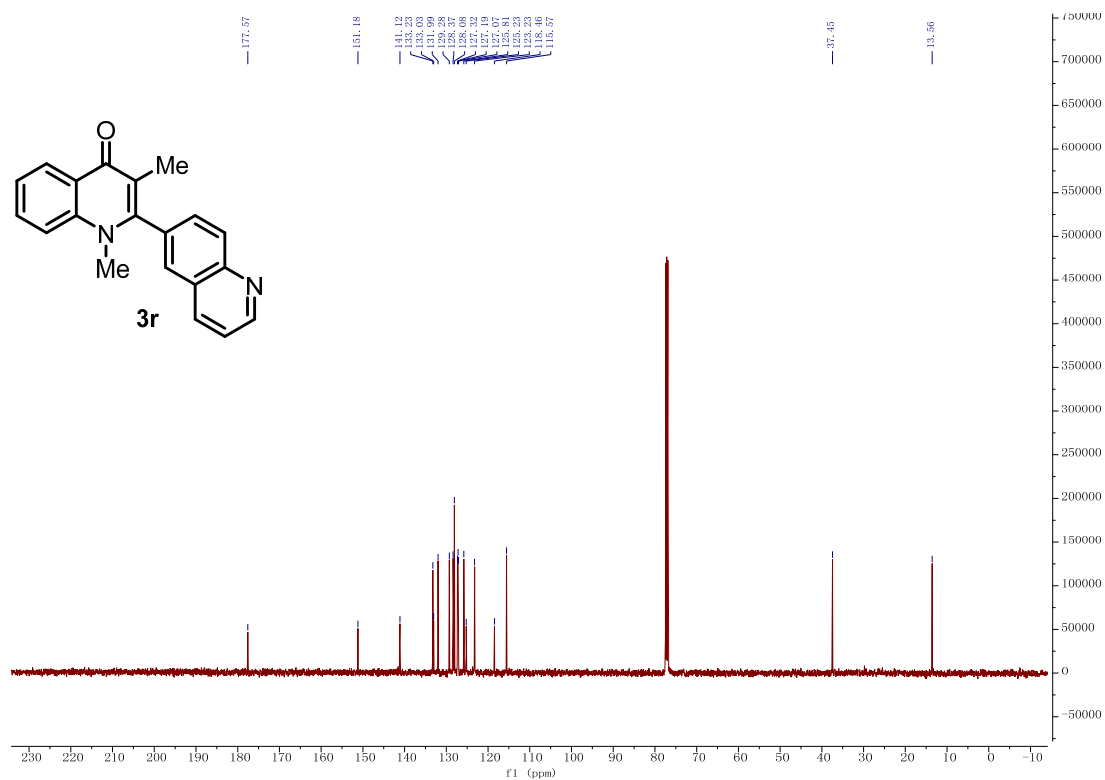



2-(benzofuran-5-yl)-1,3-dimethylquinolin-4(1H)-one (3s). <sup>1</sup>H NMR (500 MHz, CDCl<sub>3</sub>)

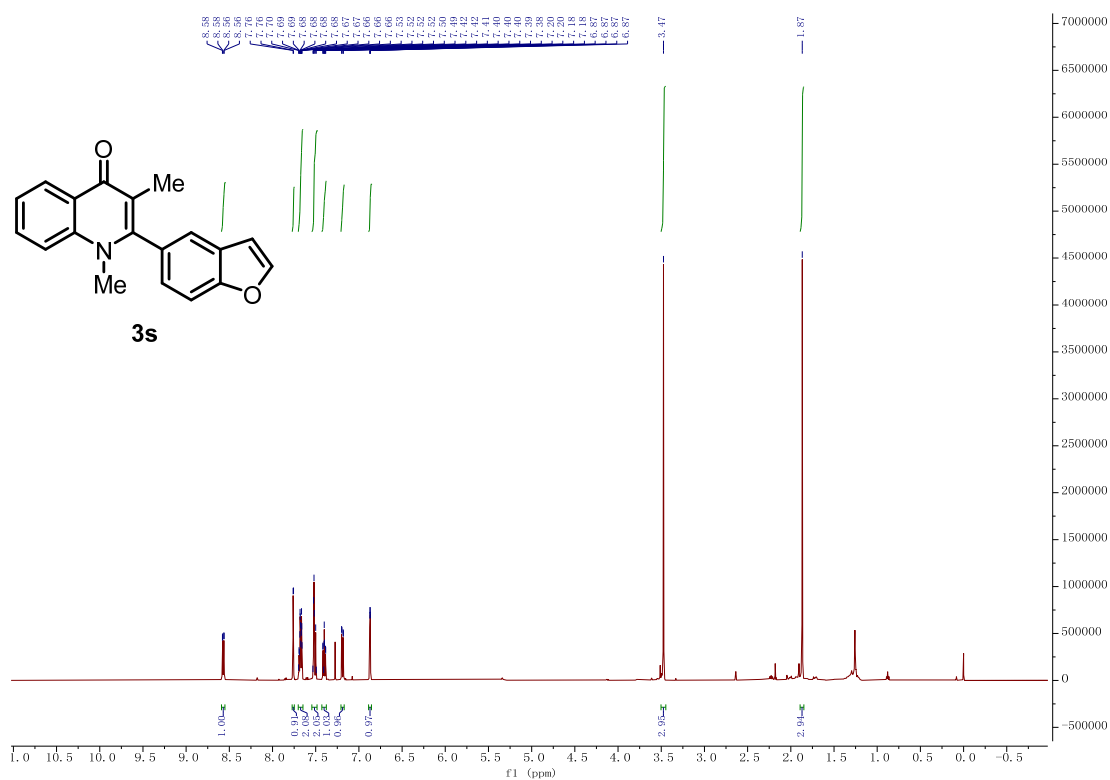

2-(benzofuran-5-yl)-1,3-dimethylquinolin-4(1H)-one (3s). <sup>13</sup>C NMR (125 MHz, CDCl<sub>3</sub>)

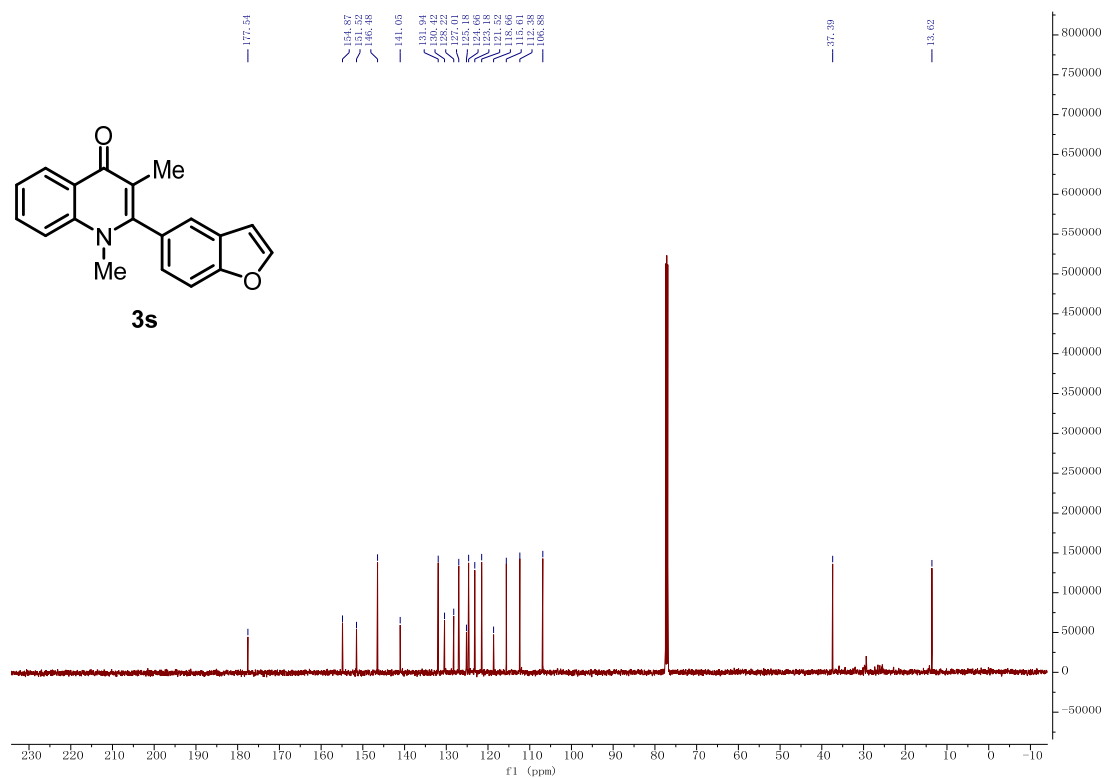

1,3-dimethyl-2-(1-methyl-1H-indol-5-yl)quinolin-4(1H)-one (3t). <sup>1</sup>H NMR (500 MHz, CDCl<sub>3</sub>)

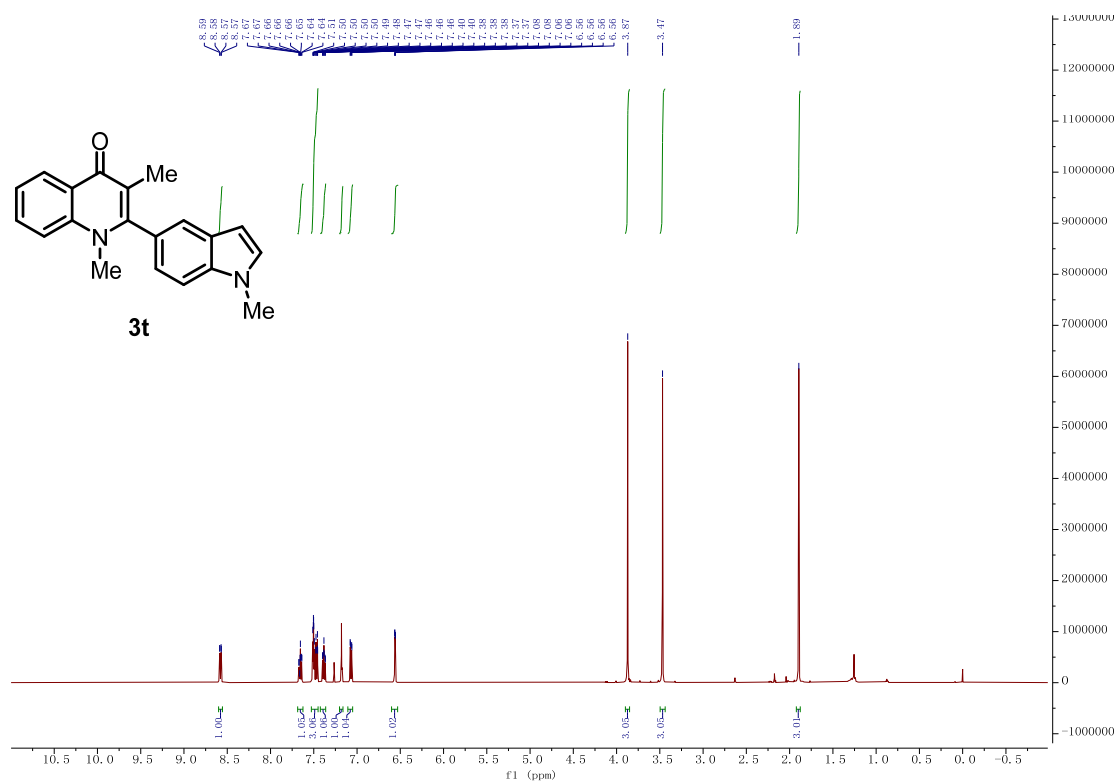

1,3-dimethyl-2-(1-methyl-1H-indol-5-yl)quinolin-4(1H)-one (3t). <sup>13</sup>C NMR (125 MHz, CDCl<sub>3</sub>)

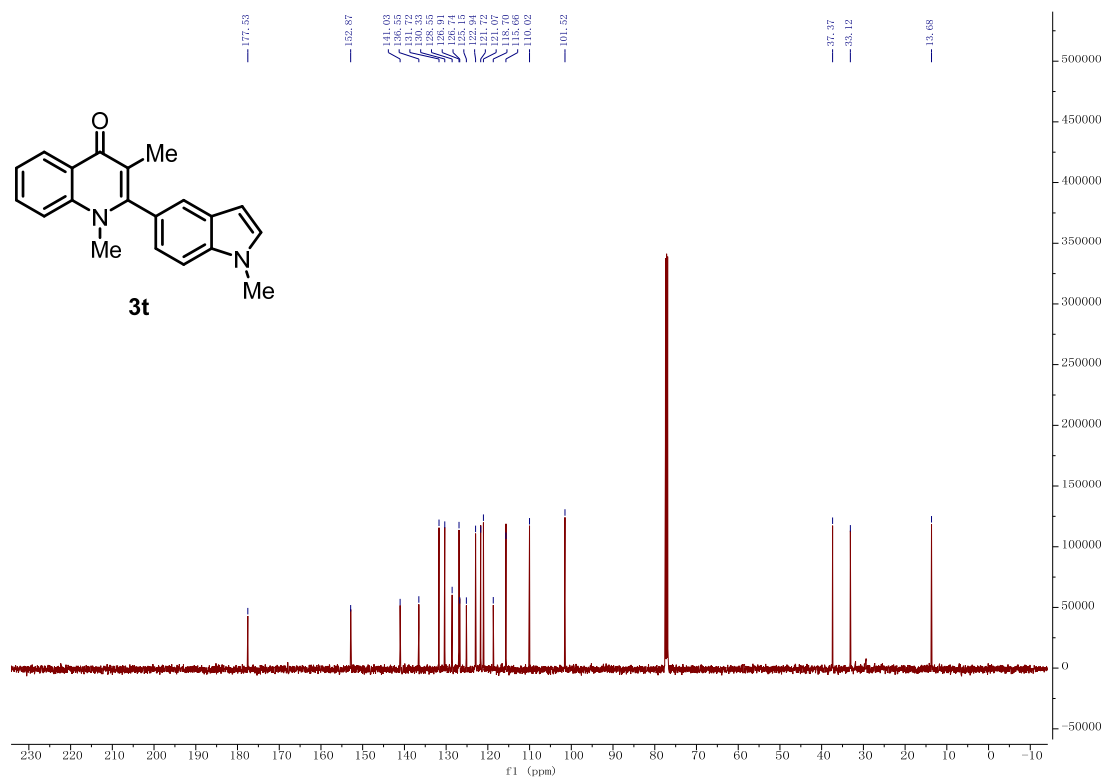



1,3-dimethyl-2-(thiophen-3-yl)quinolin-4(1H)-one (3v). <sup>1</sup>H NMR (500 MHz, CDCl<sub>3</sub>)

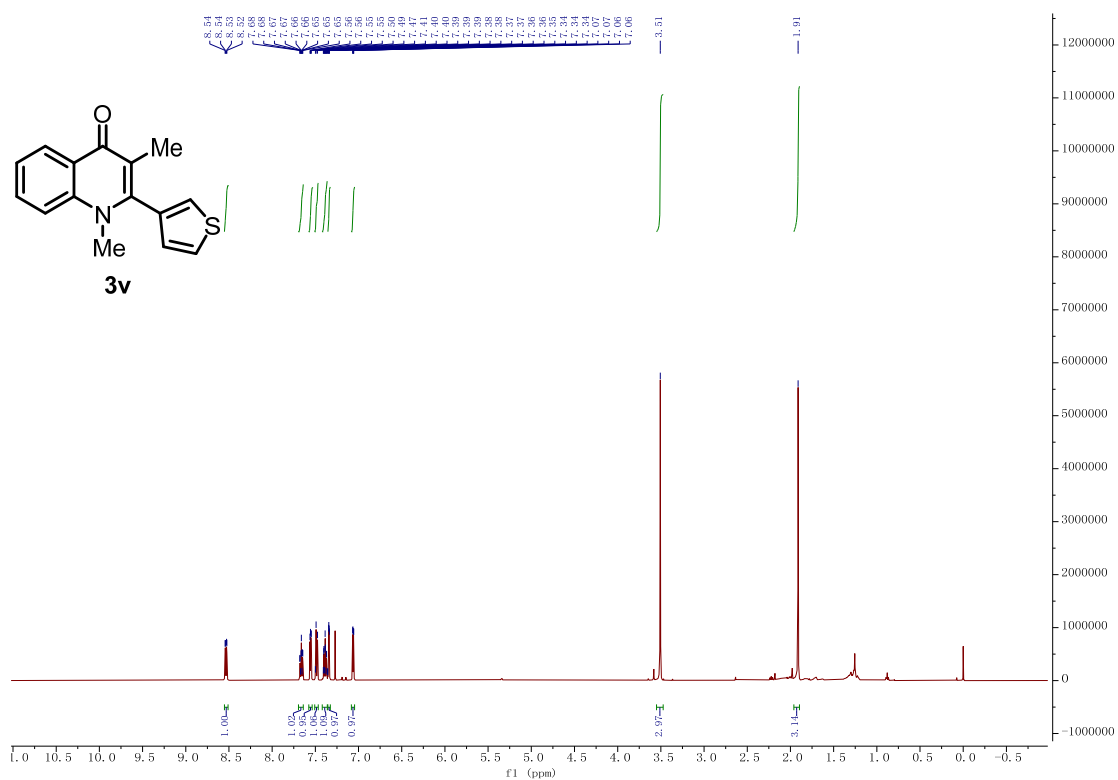

1,3-dimethyl-2-(thiophen-3-yl)quinolin-4(1H)-one (3v). <sup>13</sup>C NMR (125 MHz, CDCl<sub>3</sub>)

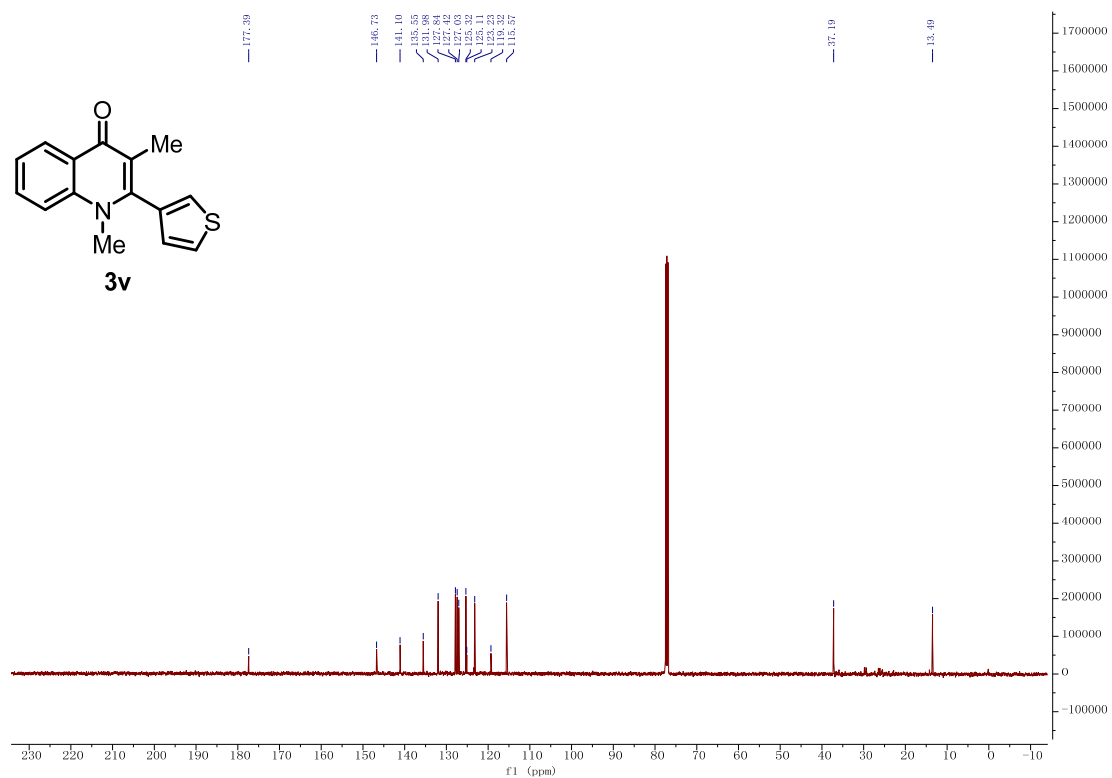

**(3*S*,8*S*,9*S*,10*R*,13*R*,14*S*,17*R*)-10,13-dimethyl-17-((*R*)-6-methylheptan-2-yl)-2,3,4,7,8,9,10,11,12,13,14,15,16,17-tetradecahydro-1*H*-cyclopenta[*a*]phenanthr-en-3-yl 4-(1,3-dimethyl-4-oxo-1,4-dihydroquinolin-2-yl)benzoate (3w). <sup>1</sup>H NMR (500 MHz, CDCl<sub>3</sub>)**

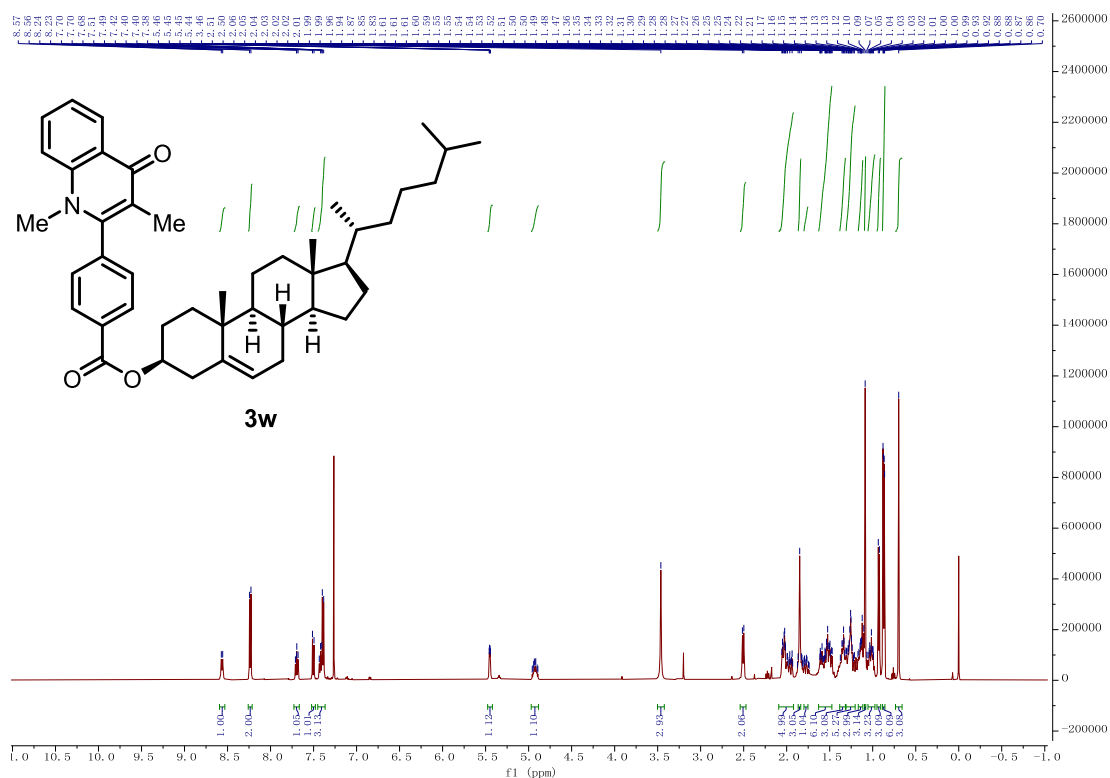

**(3*S*,8*S*,9*S*,10*R*,13*R*,14*S*,17*R*)-10,13-dimethyl-17-((*R*)-6-methylheptan-2-yl)-2,3,4,7,8,9,10,11,12,13,14,15,16,17-tetradecahydro-1*H*-cyclopenta[*a*]phenanthr-en-3-yl 4-(1,3-dimethyl-4-oxo-1,4-dihydroquinolin-2-yl)benzoate (3w). <sup>13</sup>C NMR (125 MHz, CDCl<sub>3</sub>)**

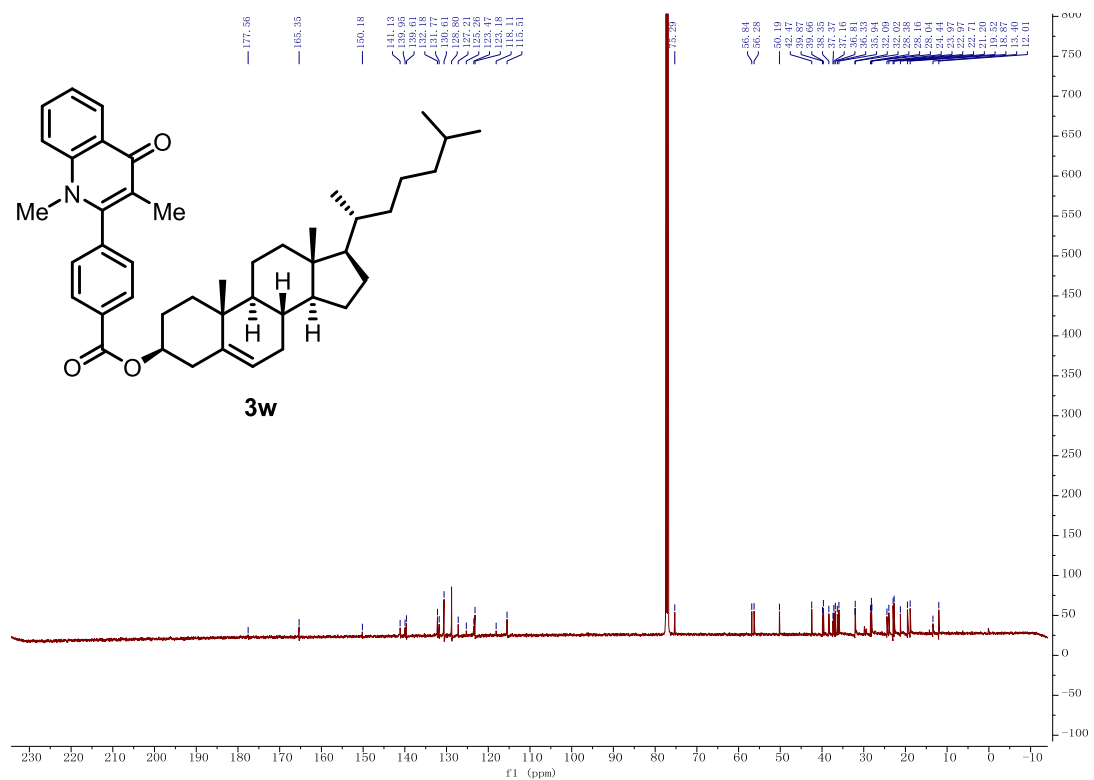

**1,3,5-trimethyl-2-(4-(trimethylsilyl)phenyl)quinolin-4(1H)-one (3x).**  $^1\text{H}$  NMR (500 MHz,  $\text{CDCl}_3$ )

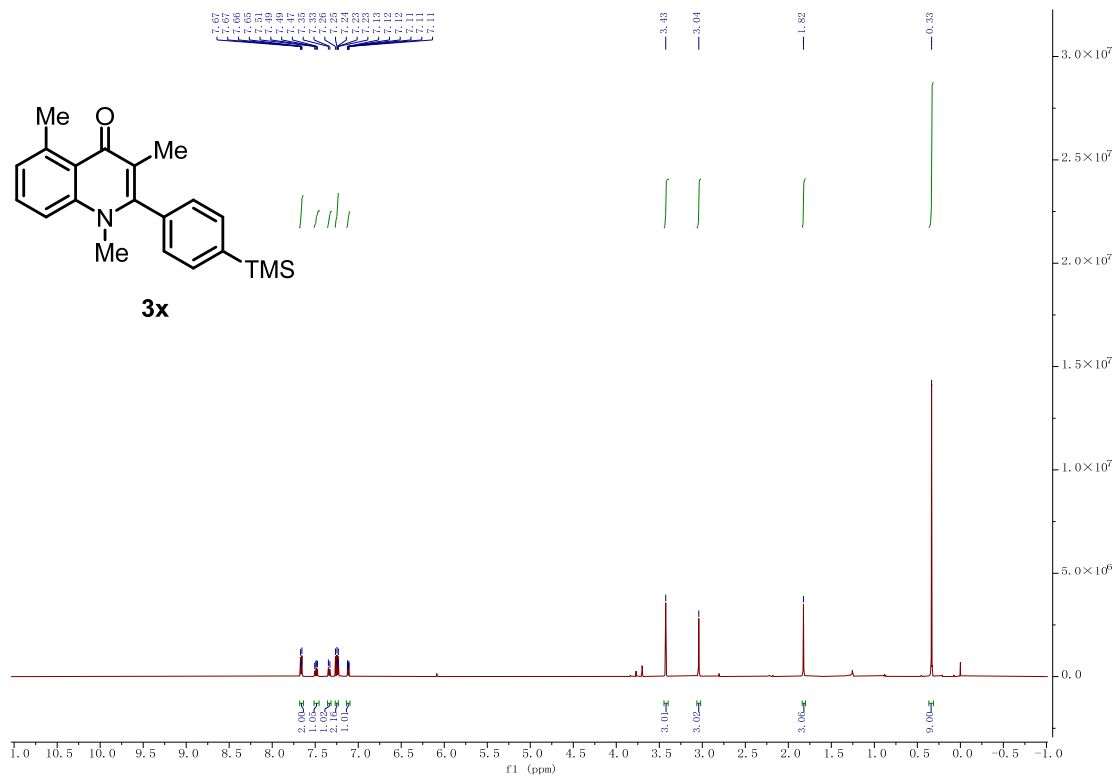

**1,3,5-trimethyl-2-(4-(trimethylsilyl)phenyl)quinolin-4(1H)-one (3x).**  $^{13}\text{C}$  NMR (125 MHz,  $\text{CDCl}_3$ )

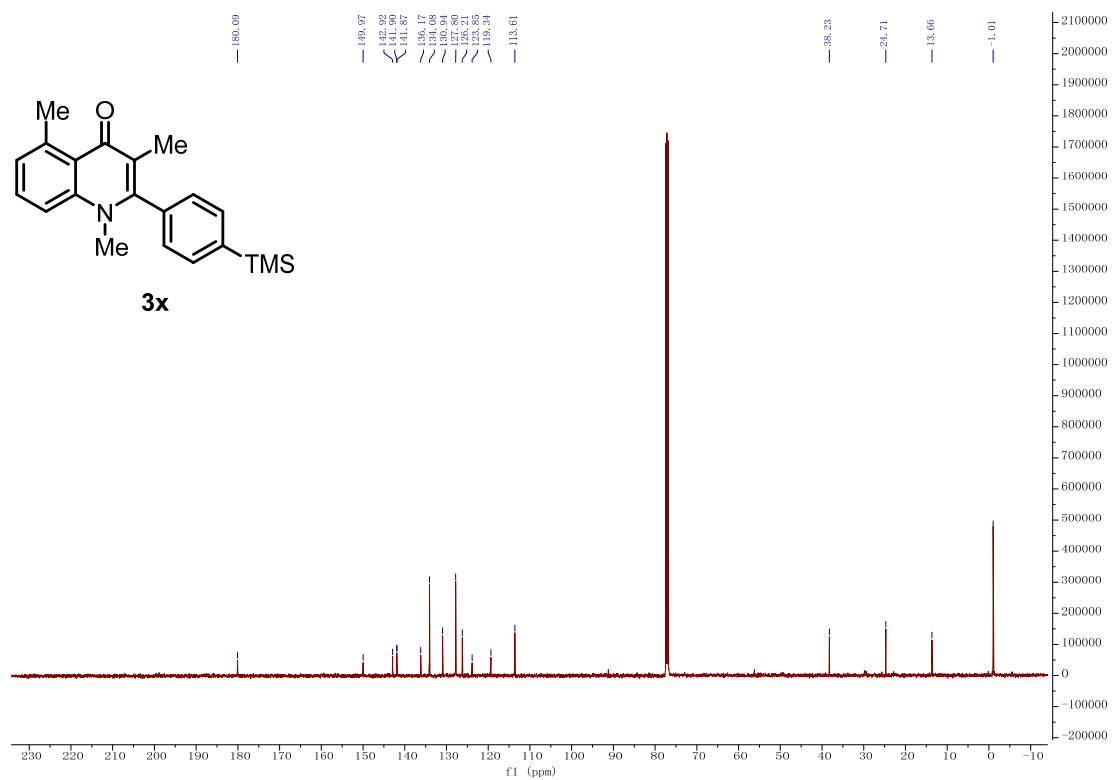



**6-fluoro-1,3-dimethyl-2-(4-(trimethylsilyl)phenyl)quinolin-4(1H)-one (3z). <sup>1</sup>H NMR (500 MHz, CDCl<sub>3</sub>)**

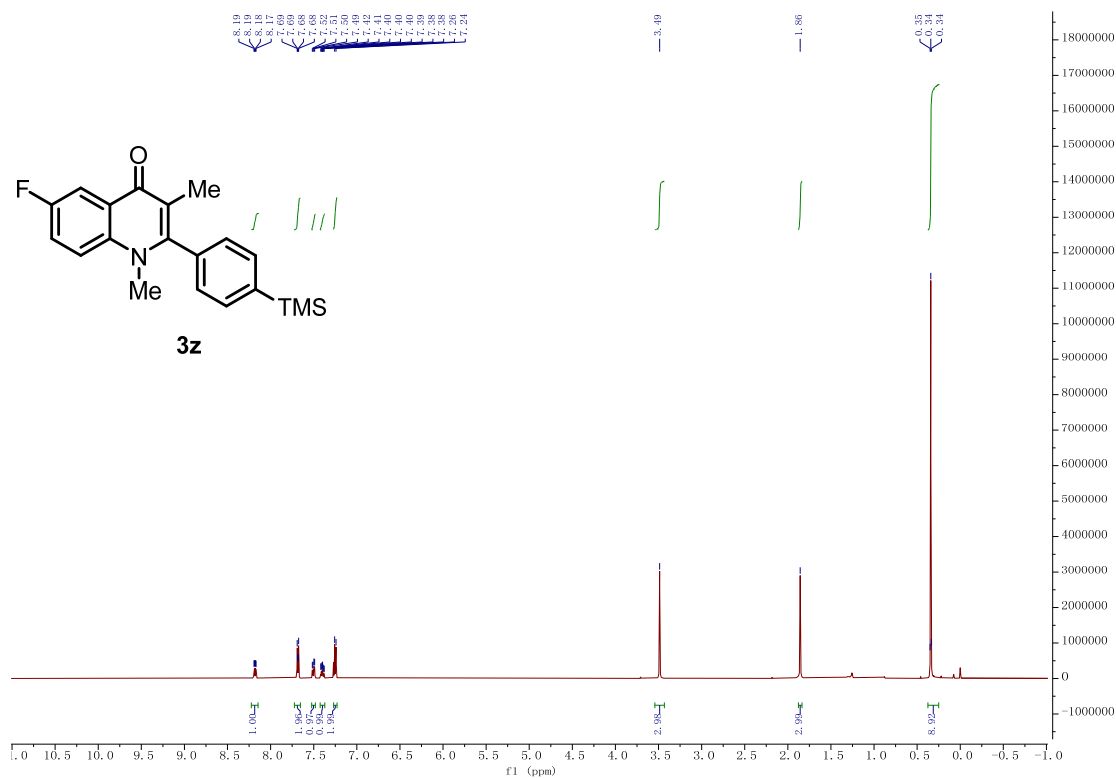

**6-fluoro-1,3-dimethyl-2-(4-(trimethylsilyl)phenyl)quinolin-4(1H)-one (3z). <sup>13</sup>C NMR (125 MHz, CDCl<sub>3</sub>)**

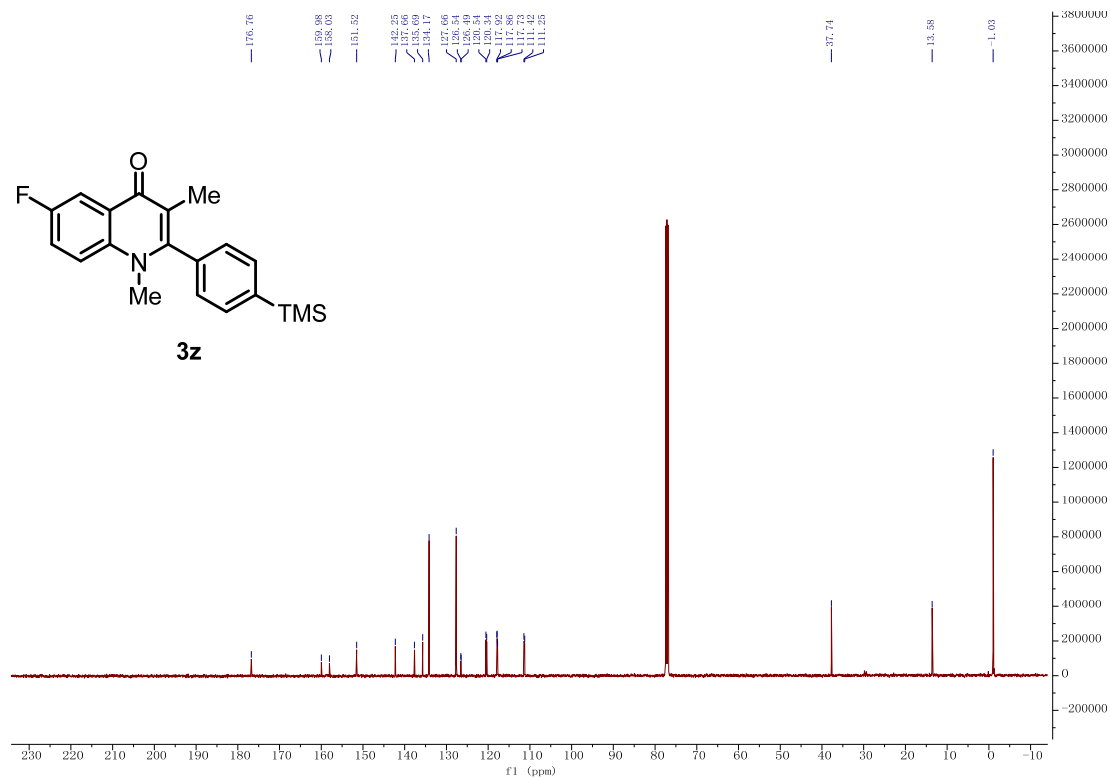



**6-fluoro-1,3-dimethyl-2-(4-(trimethylsilyl)phenyl)quinolin-4(1H)-one (3z). <sup>19</sup>F NMR (470 MHz, CDCl<sub>3</sub>)**

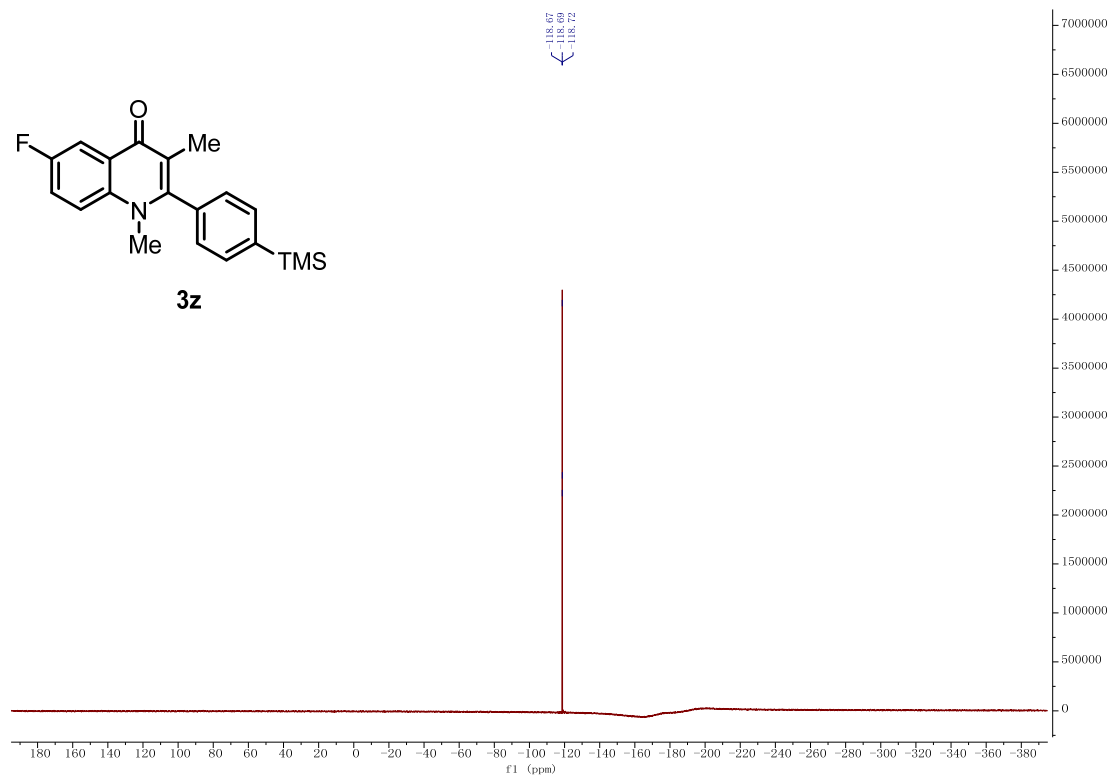

**1,3-dimethyl-6-(trifluoromethoxy)-2-(4-(trimethylsilyl)phenyl)quinolin-4(1H)-one (3aa). <sup>1</sup>H NMR (500 MHz, CDCl<sub>3</sub>)**

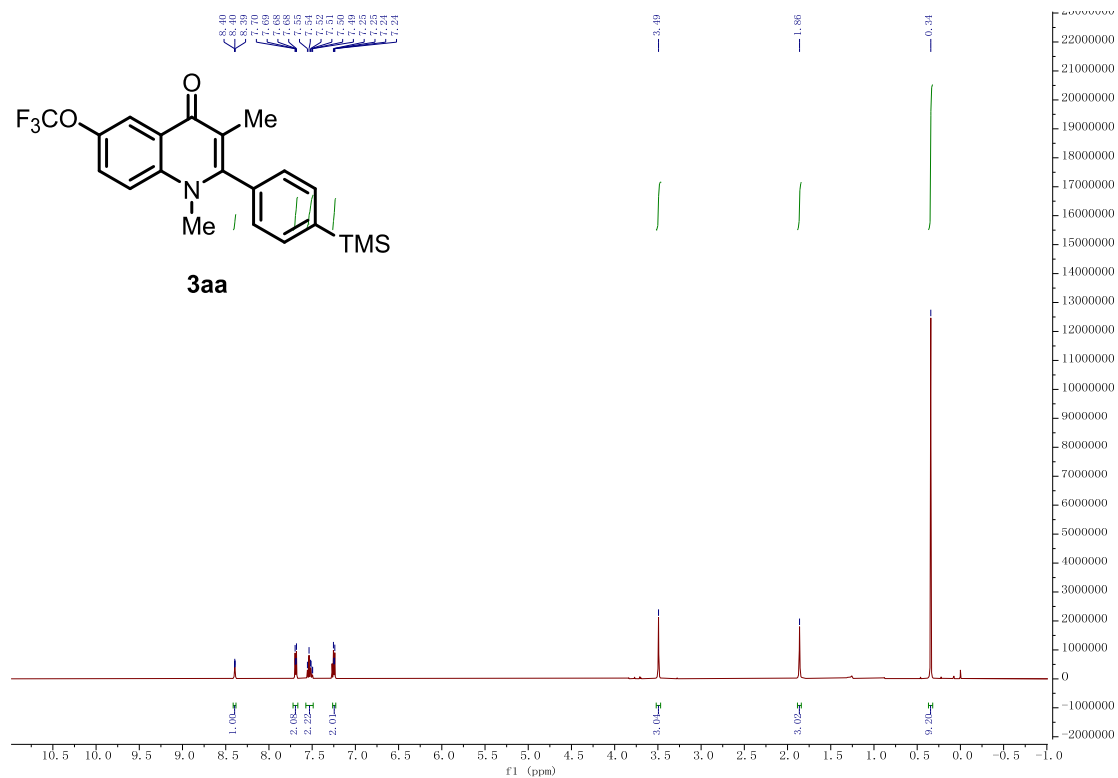

**1,3-dimethyl-6-(trifluoromethoxy)-2-(4-(trimethylsilyl)phenyl)quinolin-4(1H)-one (3aa). <sup>13</sup>C**  
NMR (125 MHz, CDCl<sub>3</sub>)

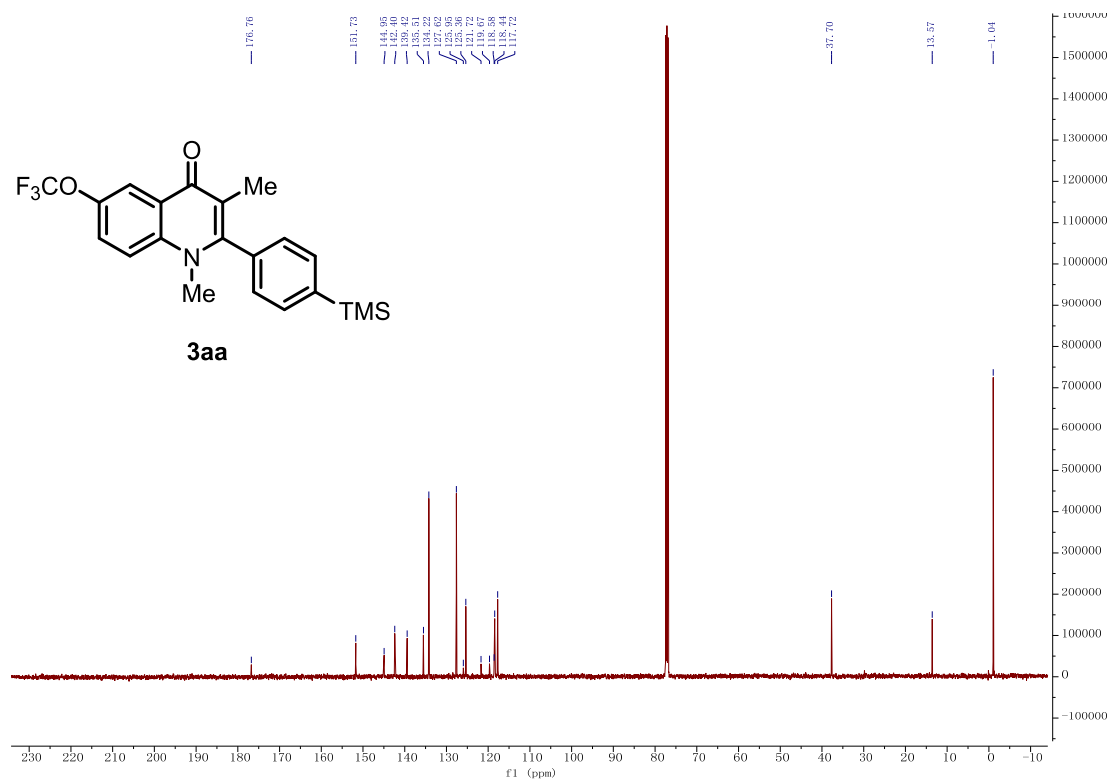

**1,3-dimethyl-6-(trifluoromethoxy)-2-(4-(trimethylsilyl)phenyl)quinolin-4(1H)-one (3aa). <sup>19</sup>F**  
NMR (470 MHz, CDCl<sub>3</sub>)

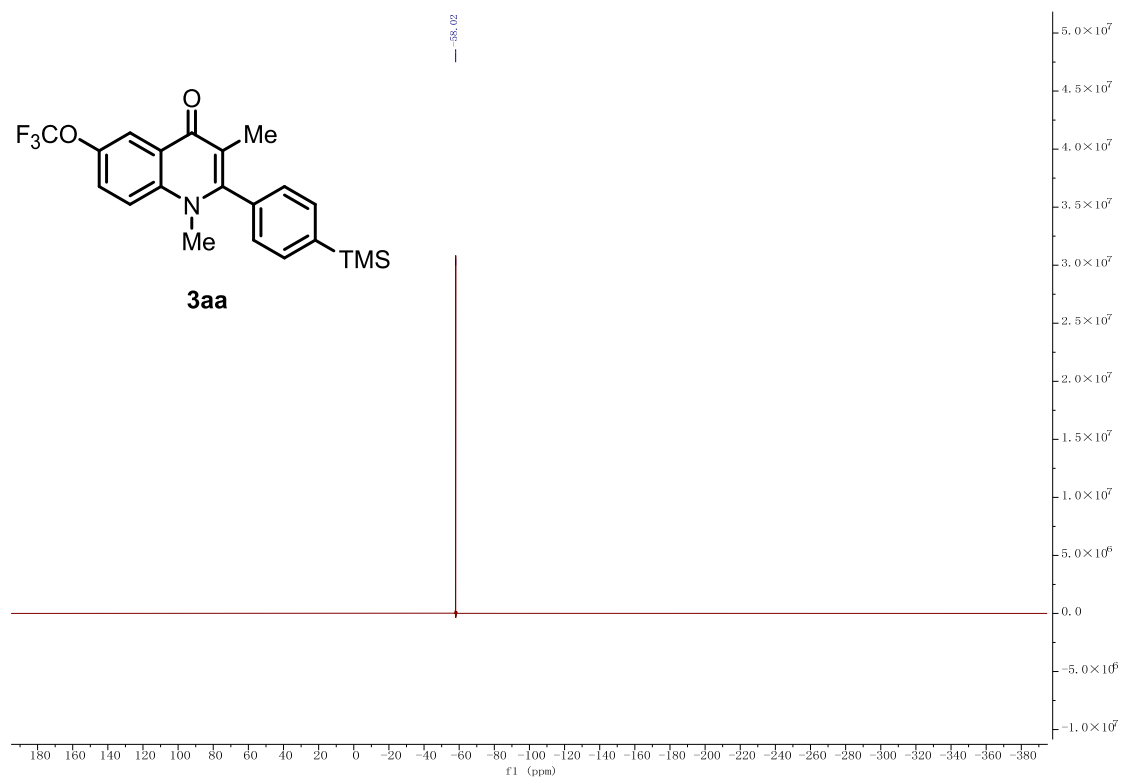

**6-methoxy-1,3-dimethyl-2-(4-(trimethylsilyl)phenyl)quinolin-4(1H)-one (3ab). <sup>1</sup>H NMR (500 MHz, CDCl<sub>3</sub>)**

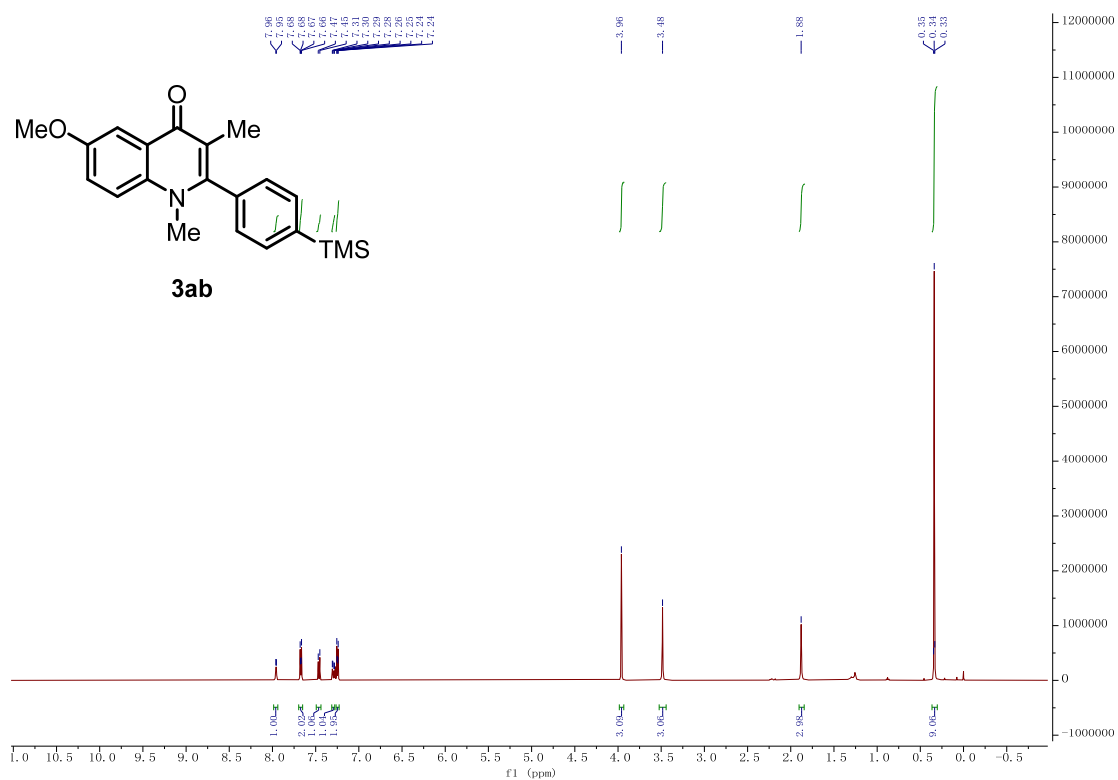

**6-methoxy-1,3-dimethyl-2-(4-(trimethylsilyl)phenyl)quinolin-4(1H)-one (3ab). <sup>13</sup>C NMR (125 MHz, CDCl<sub>3</sub>)**

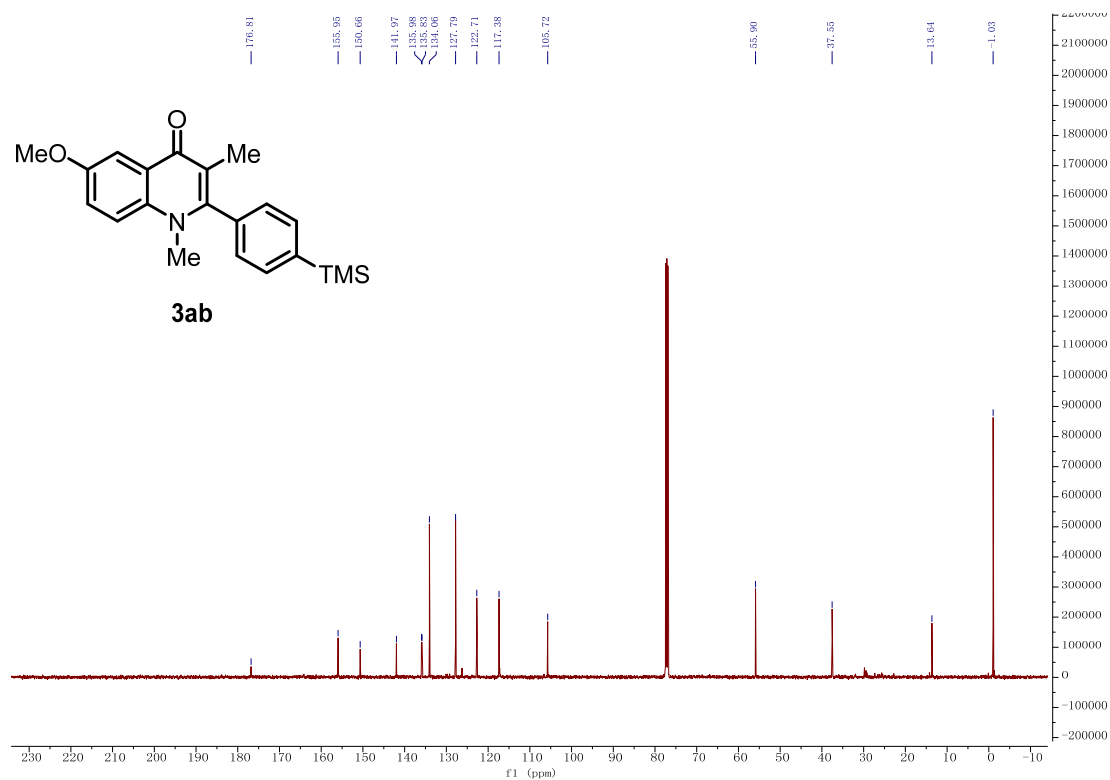



**1-methyl-3-(p-tolyl)-2-(4-(trimethylsilyl)phenyl)quinolin-4(1H)-one (3ad). <sup>1</sup>H NMR (500 MHz, CDCl<sub>3</sub>)**

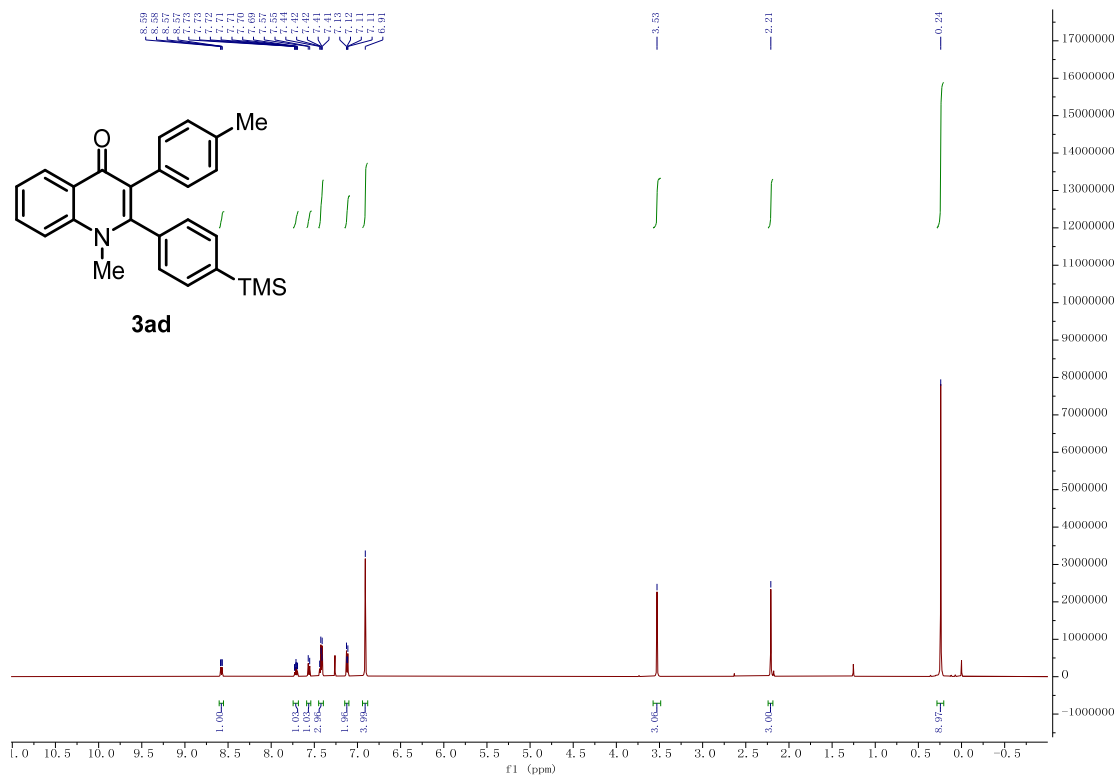

**1-methyl-3-(p-tolyl)-2-(4-(trimethylsilyl)phenyl)quinolin-4(1H)-one (3ad). <sup>13</sup>C NMR (125 MHz, CDCl<sub>3</sub>)**

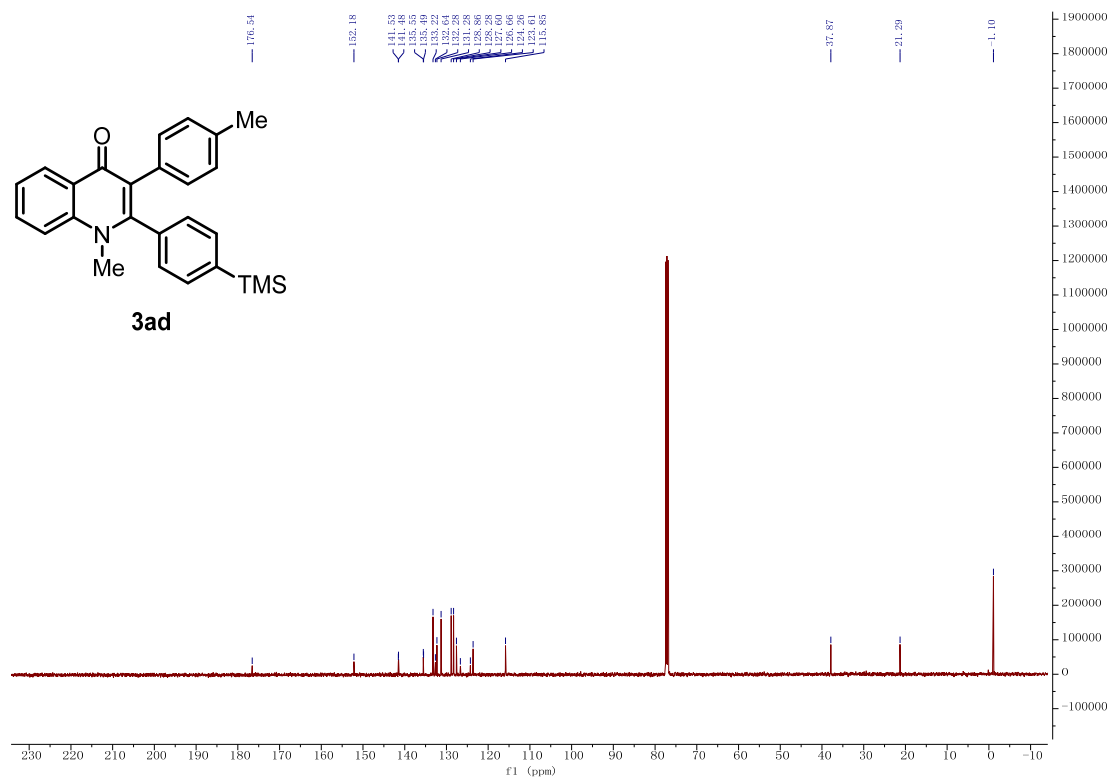

**3-(4-chlorophenyl)-1-methyl-2-(4-(trimethylsilyl)phenyl)quinolin-4(1H)-one (3ae). <sup>1</sup>H NMR**  
(500 MHz, CDCl<sub>3</sub>)

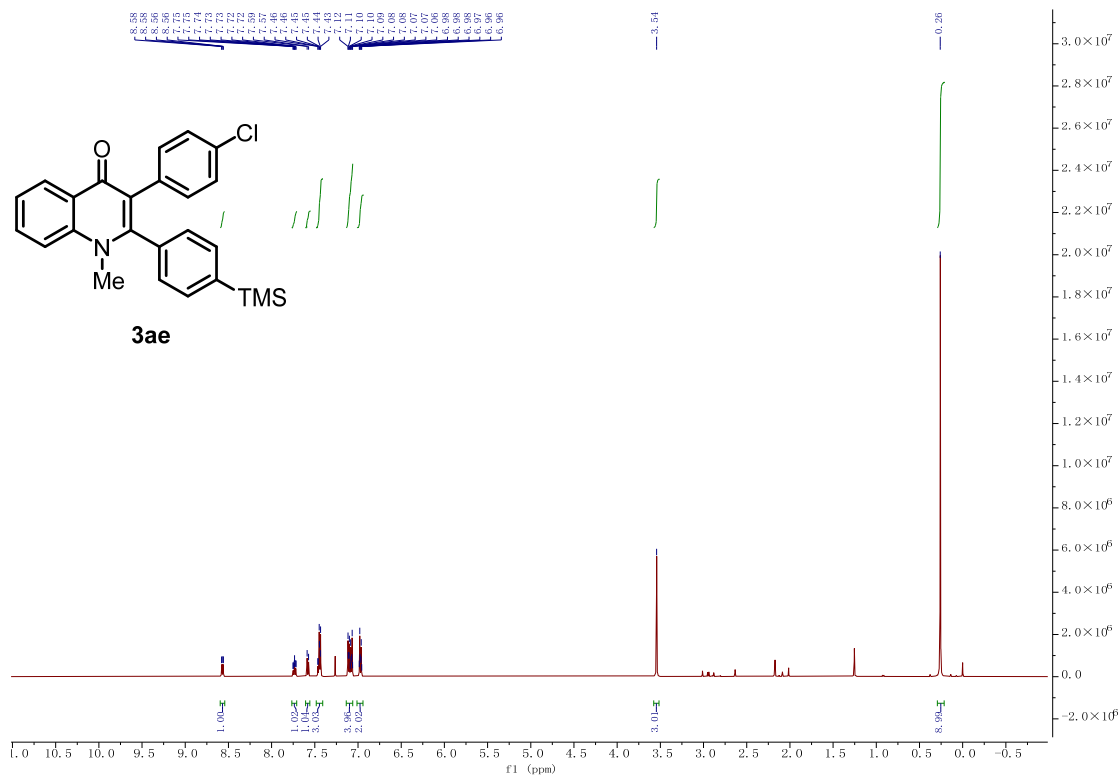

**3-(4-chlorophenyl)-1-methyl-2-(4-(trimethylsilyl)phenyl)quinolin-4(1H)-one (3ae). <sup>13</sup>C NMR**  
(125 MHz, CDCl<sub>3</sub>)

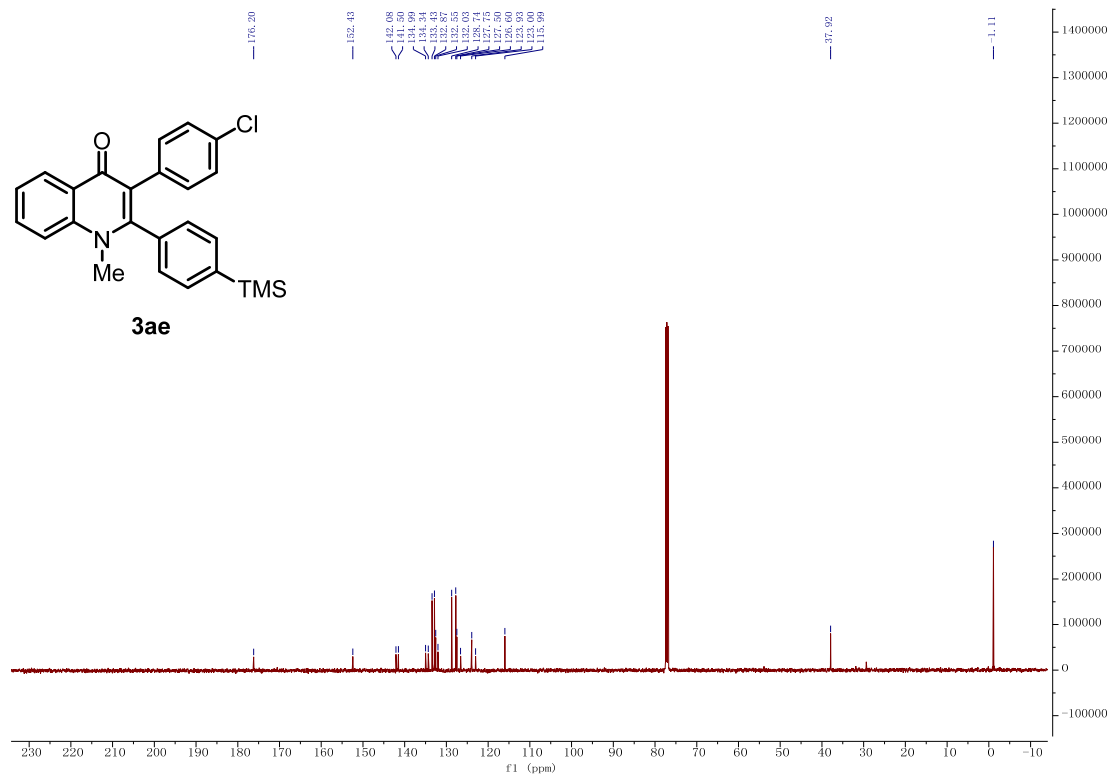

**3-cyclohexyl-1-methyl-2-(4-(trimethylsilyl)phenyl)quinolin-4(1H)-one (3af). <sup>1</sup>H NMR (400 MHz, CDCl<sub>3</sub>)**

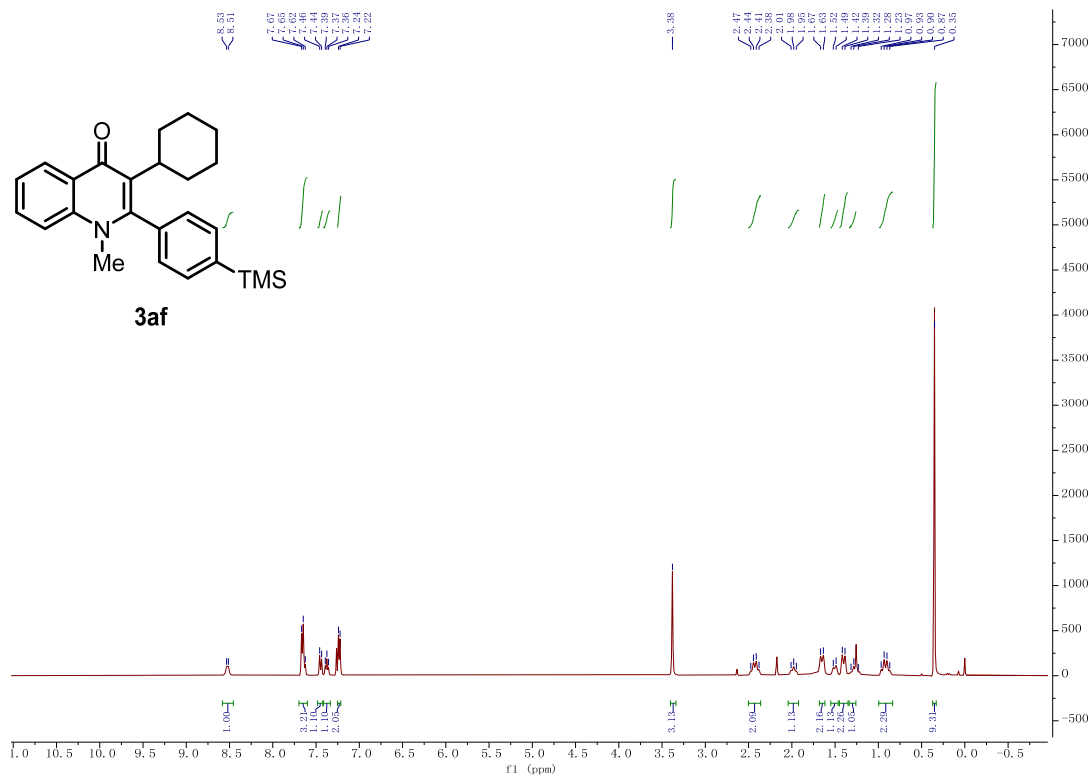

**3-cyclohexyl-1-methyl-2-(4-(trimethylsilyl)phenyl)quinolin-4(1H)-one (3af). <sup>13</sup>C NMR (125 MHz, CDCl<sub>3</sub>)**

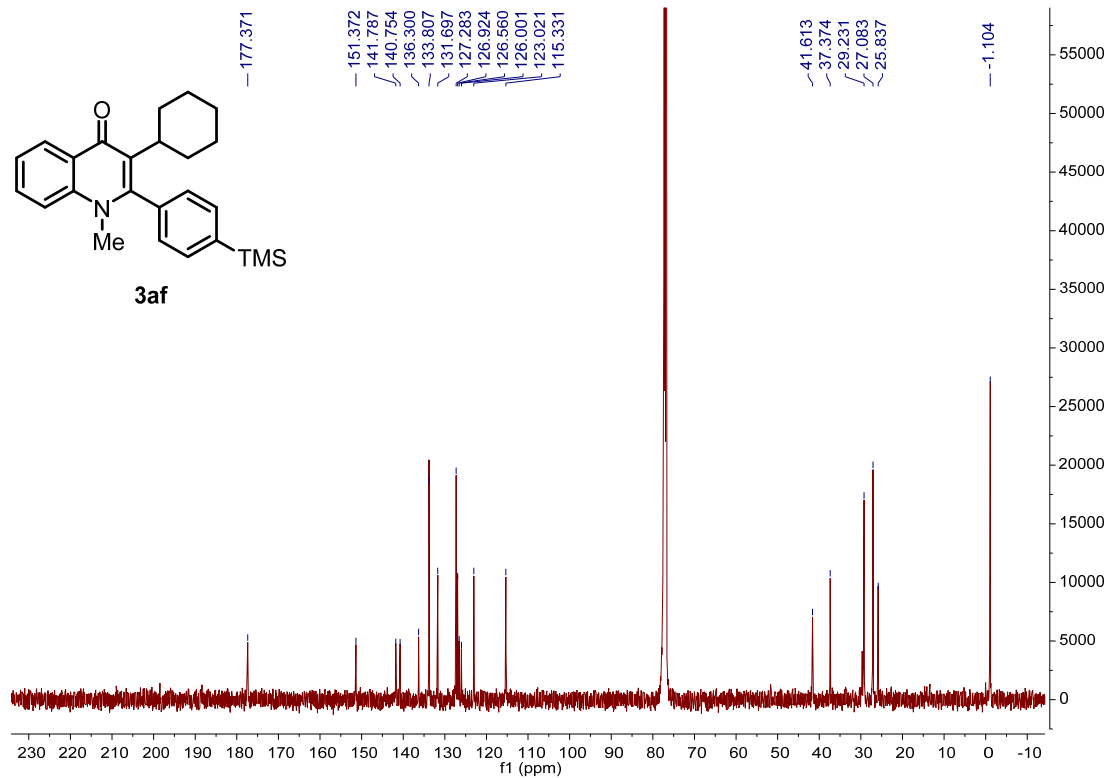

**1-methyl-2-(4-(trimethylsilyl)phenyl)quinolin-4(1H)-one (3ag). <sup>1</sup>H NMR (500 MHz, CDCl<sub>3</sub>)**

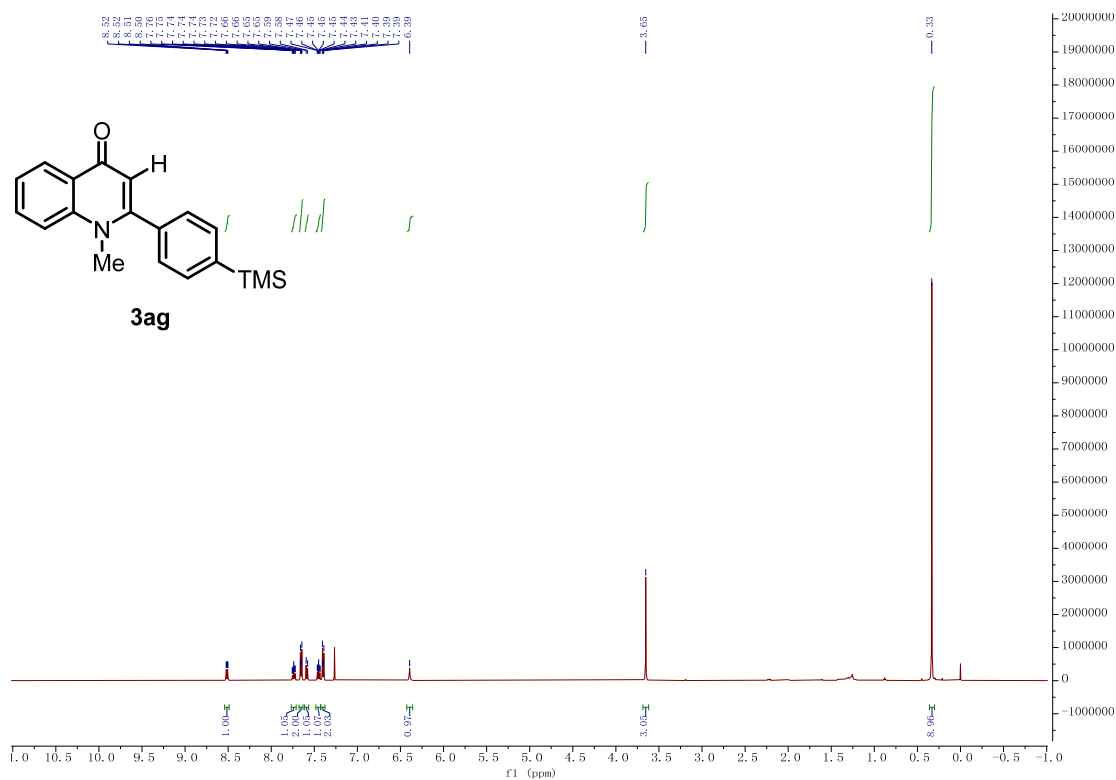

**1-methyl-2-(4-(trimethylsilyl)phenyl)quinolin-4(1H)-one (3ag). <sup>13</sup>C NMR (125 MHz, CDCl<sub>3</sub>)**

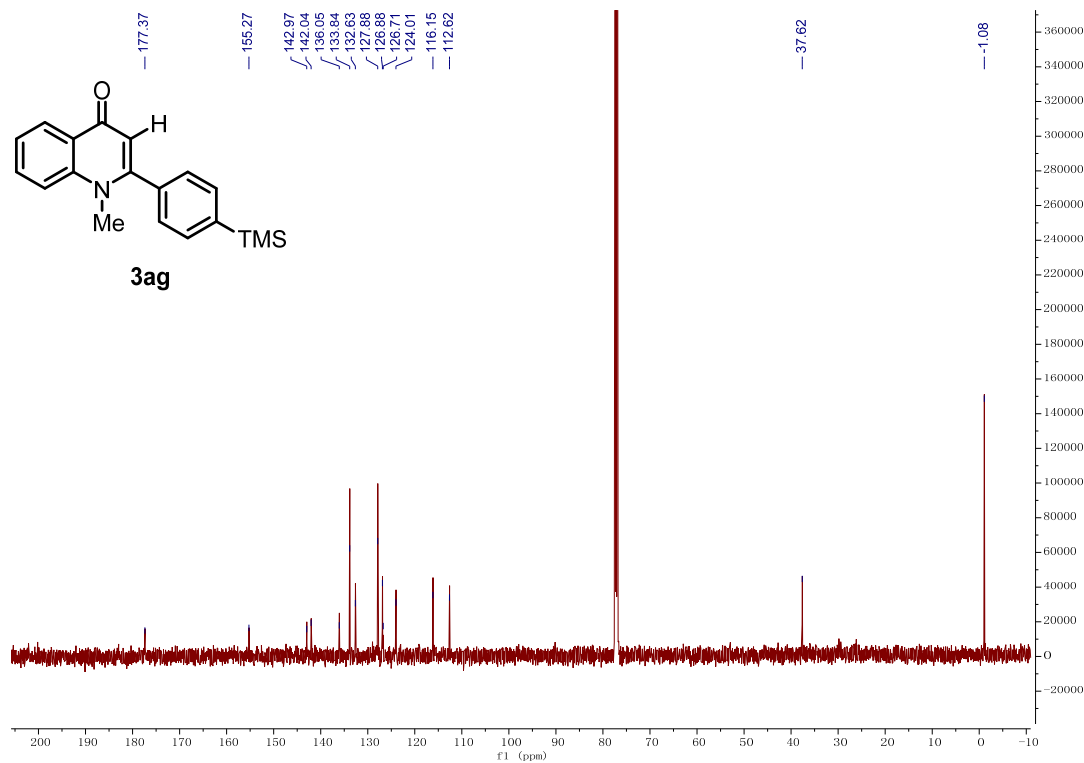



**Ethyl 1-methyl-4-oxo-2-(4-(trimethylsilyl)phenyl)-1,4-dihydroquinoline-3-carboxylate (3ah).**

<sup>1</sup>H NMR (500 MHz, CDCl<sub>3</sub>)

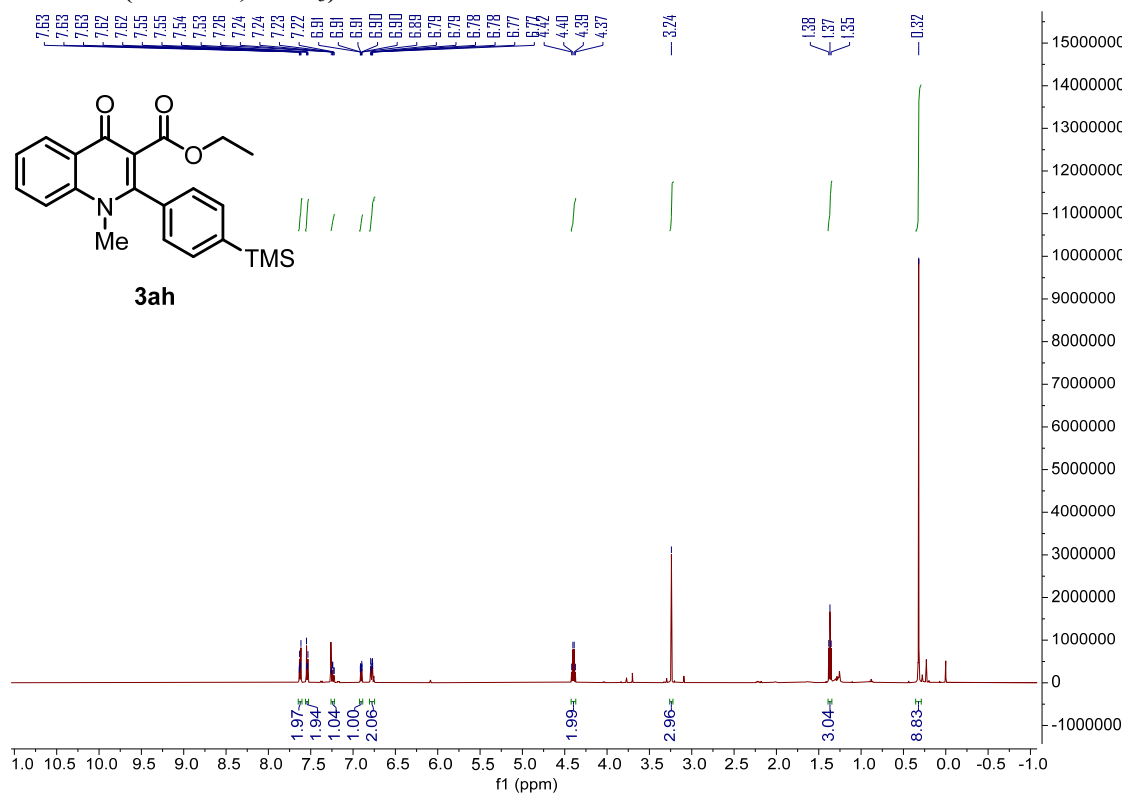

**Ethyl 1-methyl-4-oxo-2-(4-(trimethylsilyl)phenyl)-1,4-dihydroquinoline-3-carboxylate (3ah).**

<sup>13</sup>C NMR (125 MHz, CDCl<sub>3</sub>)

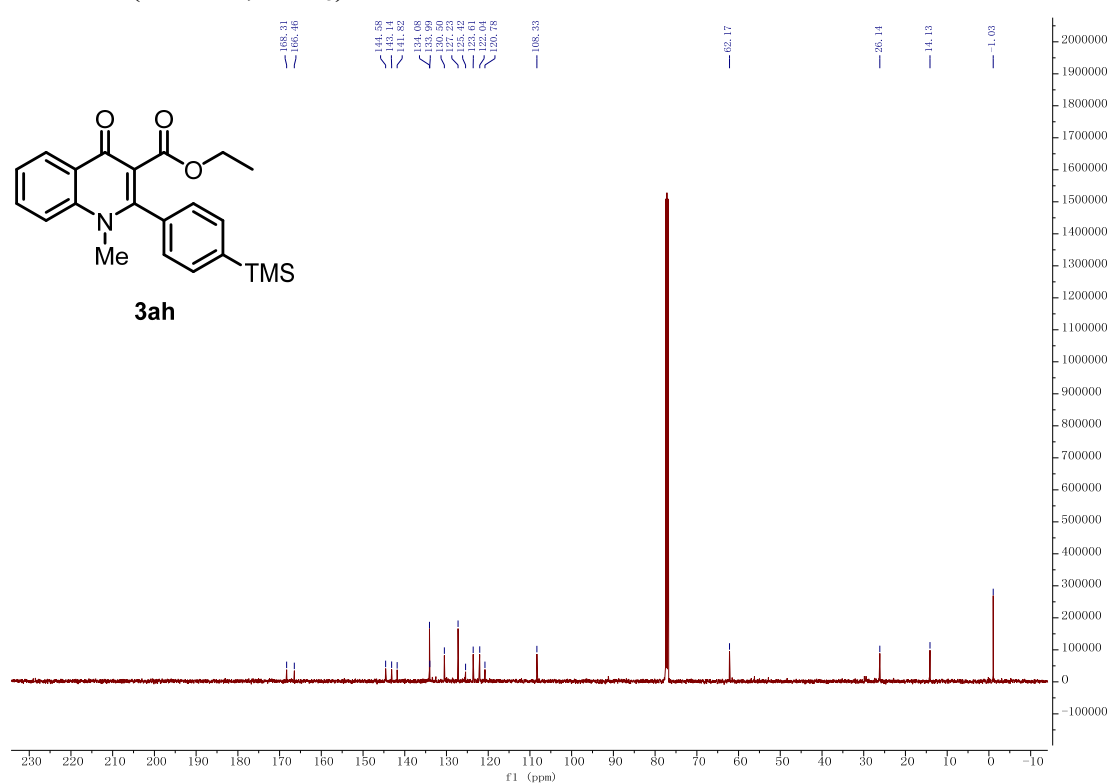



**3-methyl-1-phenyl-2-(4-(trimethylsilyl)phenyl)quinolin-4(1H)-one (3aj).**  $^1\text{H}$  NMR (500 MHz,  $\text{CDCl}_3$ )

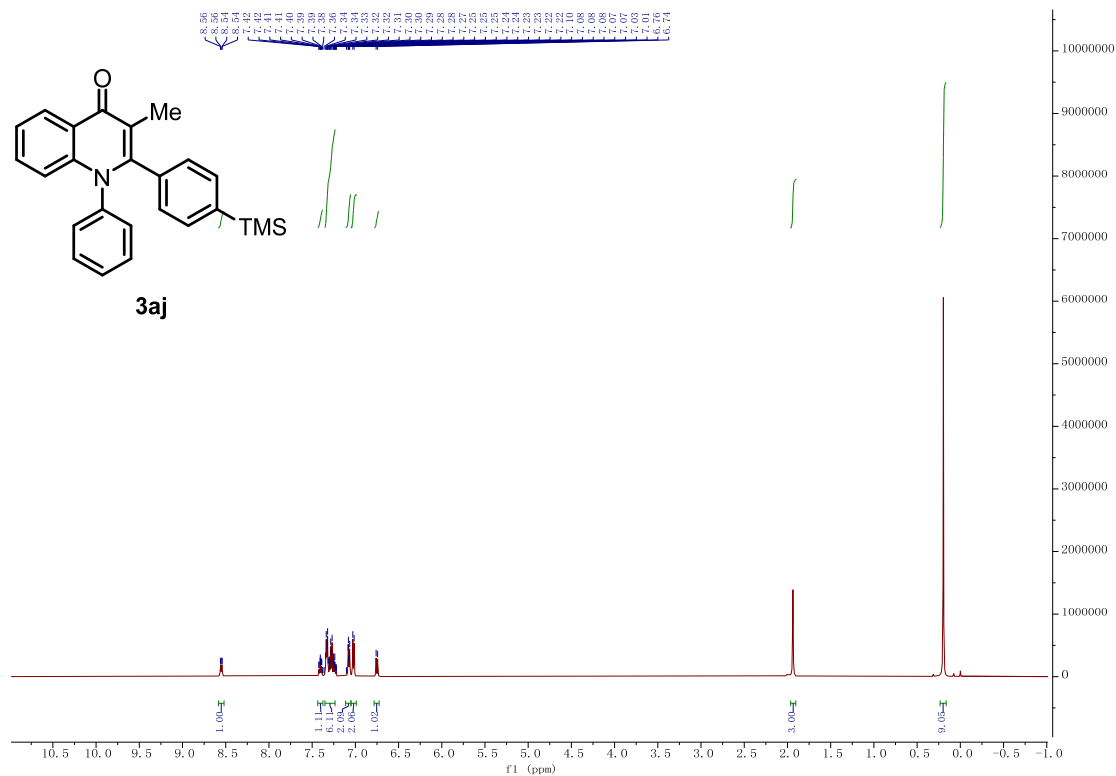

**3-methyl-1-phenyl-2-(4-(trimethylsilyl)phenyl)quinolin-4(1H)-one (3aj).**  $^{13}\text{C}$  NMR (125 MHz,  $\text{CDCl}_3$ )

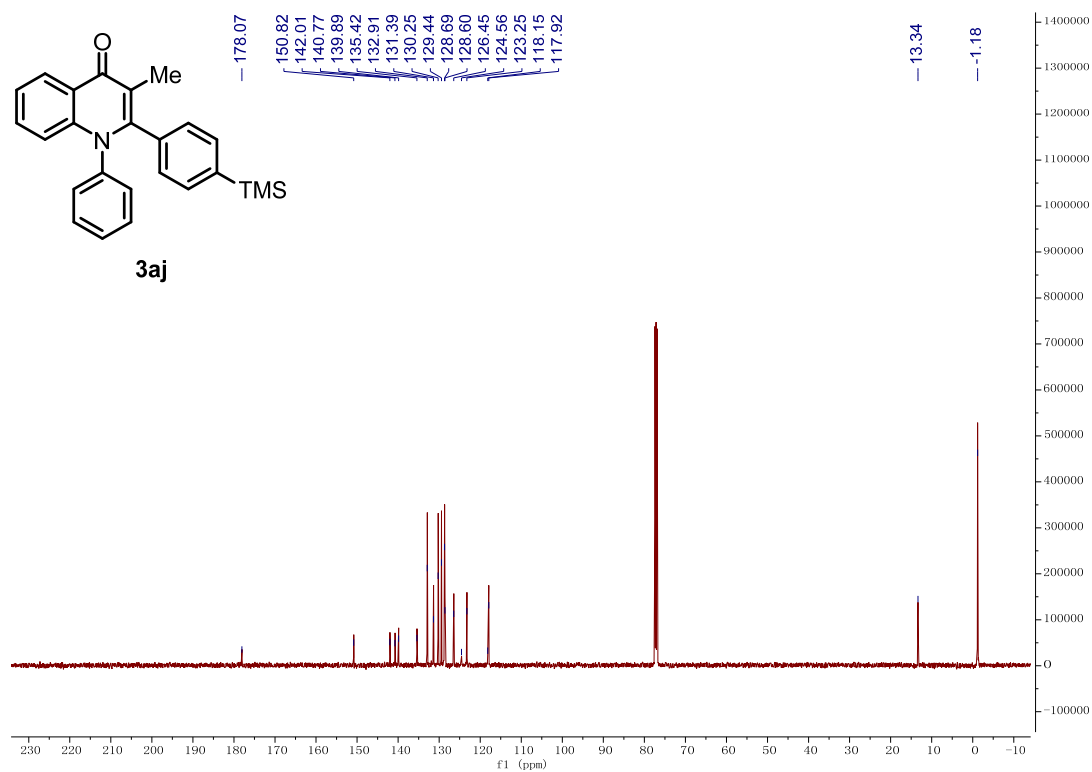

**N-(2-benzoylphenyl)-N-methylbenzamide (4). <sup>1</sup>H NMR (500 MHz, CDCl<sub>3</sub>)**

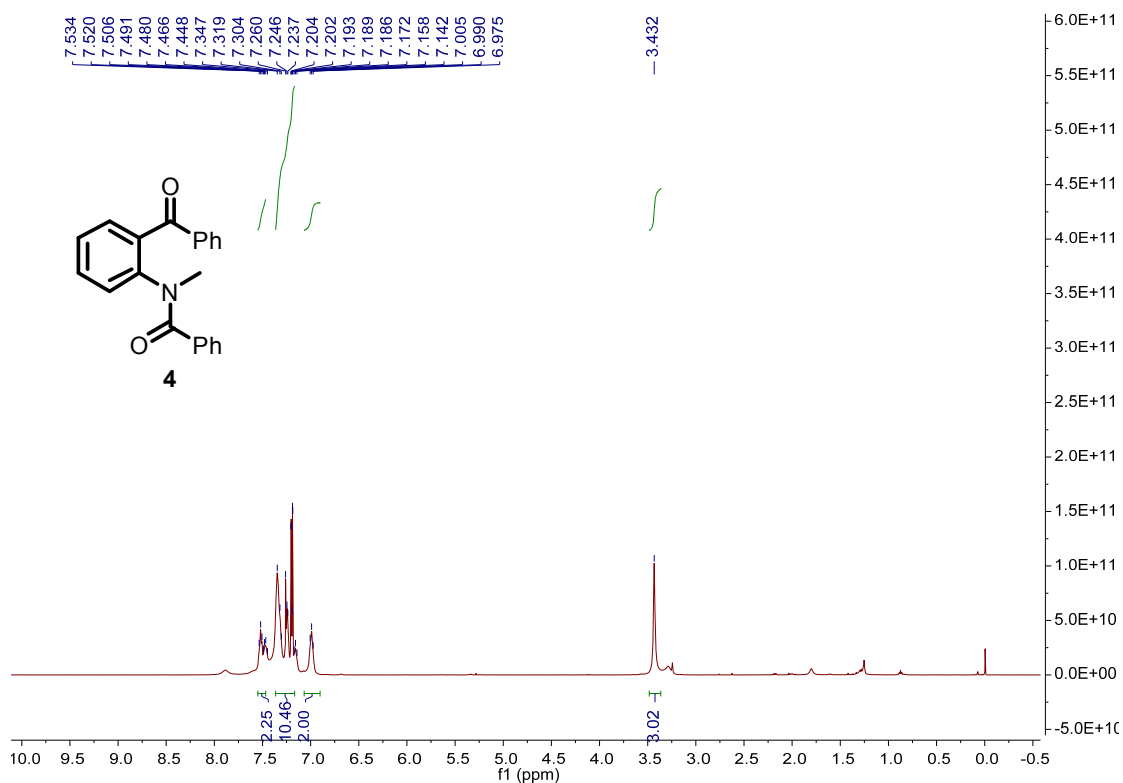

**N-(2-benzoylphenyl)-N-methylbenzamide (4). <sup>13</sup>C NMR (125 MHz, CDCl<sub>3</sub>)**

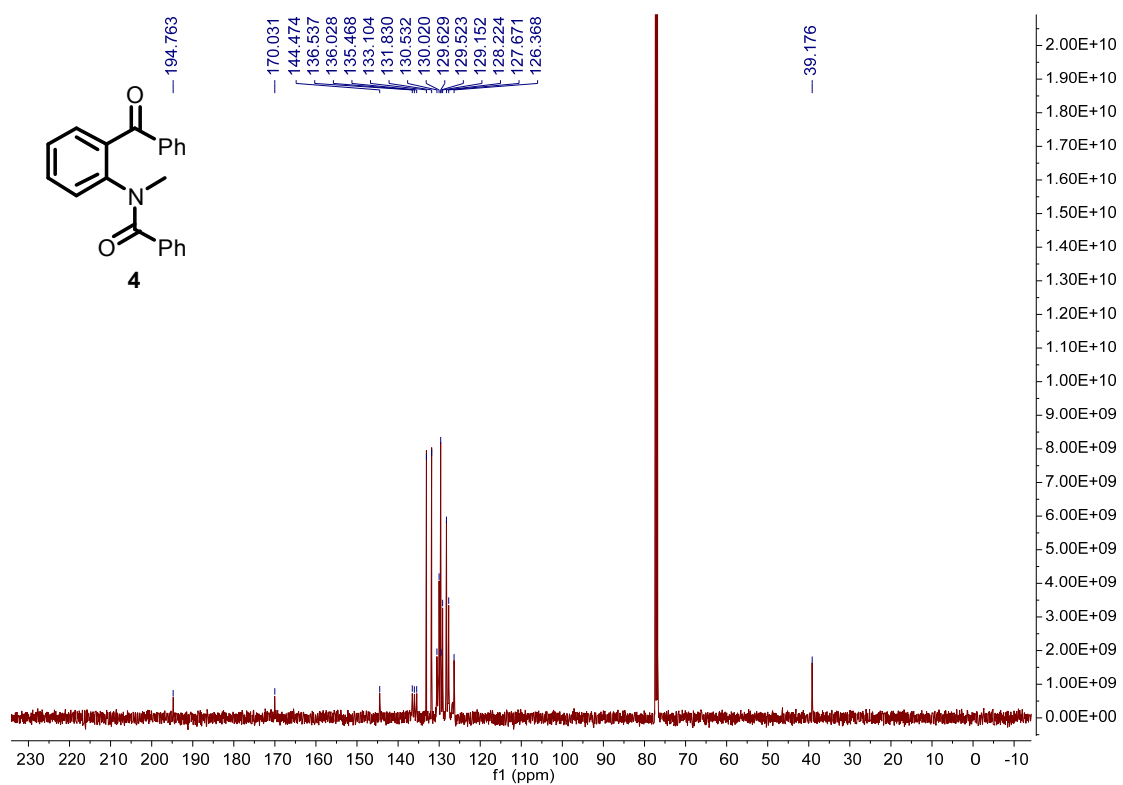

Supplement: d4cc05369a1.pdf [file d4cc05369a1.pdf]
